# Supplementary material
Source: PubMed Central journal article supplement (PMC7211974)
Supplement: pnas.1921225117.sapp.pdf [file pnas.1921225117.sapp.pdf]

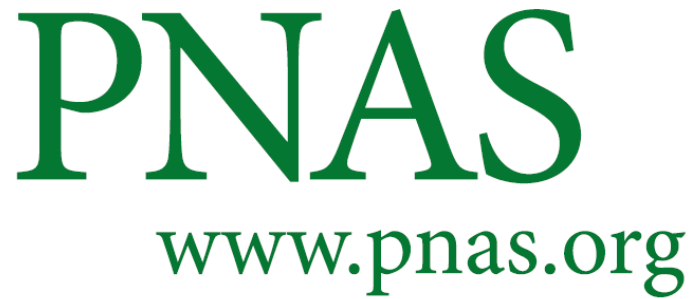

## Supplementary Information for

**Optimizing *Rhizobium*-legume symbioses by simultaneous measurement of rhizobial competitiveness and N<sub>2</sub> fixation in nodules**

**Marcela A. Mendoza-Suárez, Barney A. Geddes, Carmen Sánchez-Cañizares & Philip S. Poole\***

Department of Plant Sciences, University of Oxford, South Parks Road, Oxford, OX1 3RB, UK.

ORCID ID: MMS; 0000-0003-3419-1362, BAG; 0000-0001-8309-2083, CSC; 0000-0003-4620-5274, PSP; 0000-0001-5087-6455.

Classification: BIOLOGICAL SCIENCES: Microbiology.

\*Corresponding author: Philip Poole; Department of Plant Sciences, University of Oxford, South Parks Road, Oxford, OX1 3RB, UK. Telephone: +44 (0)1865 275023; E-mail: [philip.poole@plants.ox.ac.uk](mailto:philip.poole@plants.ox.ac.uk)

### **This PDF file includes:**

Supplementary text: SI Materials and Methods.  
Tables S1 to S16  
Figures S1 to S15  
Movies S1

## Supplementary Information Text

### SI Materials and Methods.

#### Designing PsnifH consensus promoter.

The sequence of *nifH* (pRL100162) and its upstream Inter Genic Region (IGR) from *R. leguminosarum* biovar *viciae* 3841 (Rlv3841), Rlv3841 *nifH*+IGR, was used as a template to find other genomes of the genus *Rhizobium* in the Integrated Microbial Genomes (IMG) system (1). As a result, 118 genomes (some of them as draft genomes) were collected. *BLASTn* (DNA vs. DNA E-value of  $1e^{-5}$ ) was run on the 118 genomes. Scaffolds were generated of each strain and those with an *E-value* of 0 were extracted. Each extraction was confirmed in the *National Centre for Biotechnology Information (NCBI)* (2) to verify they contained *nifH* (although some strains contained more than one copy of *nifH*). In these cases, only the copies with the complete *nifHDK* operons were considered for the design of the consensus *nifH* promoter. Following initial analysis, a new extraction was performed, this time only of the IGR-*nifH* and then aligned by ClustalW in the bioinformatics software Geneious® (Steps in Fig. S1). The final alignment of the consensus *nifH* IGR from 48 strains of the genus *Rhizobium* is 227 b (Rlv3841 *nifH* IGR is 717 bp long (Fig. S2a)). The features are: Bsal sites with GGAC and AATG overhangs for Golden Gate assembly as a PU module (nt 6 through 11 and nt 247 through 242), a UAS (nt 42 through 57), the RpoN-binding site (nt 144 through 157), and the RBS (nt 225 through 231), with a start codon ATG at nt 238 (Fig. S2b).

#### Plasmid ID as a Golden Gate T module

A Universal Primer binding site (5'-CGTTTTACAACGTCGTGACTGGG-3') was added between the 12-nt Golay barcode and T0. *In silico* analysis (with up to 5 mismatches) of the Universal Primer was performed on the full plasmid maps to ensure that it binds only to this specific region. The final construction was completed with addition of type IIS restriction enzyme recognition sites and the specific overhangs at either end of a Golden Gate T module. Plasmid IDs were designed as sense and antisense oligonucleotides (Table S3), so that they can be used directly in a Golden Gate reaction after annealing, without requiring Bsal digestion.

#### Plasmid construction by Golden Gate Cloning

Golden Gate Level 1 cloning reactions were performed with T4 DNA ligase and Bsal in a one-tube one-step reaction (3). Final plasmids were confirmed by EcoRI digestion and sequenced to confirm the vector/insert junctions (using primers in Table S2).

### **Plasmid ID library**

A total of 96 individual and unique reporter plasmids were built by Golden Gate Level 1 one-tube reaction (Bsal digestion and ligation) (3) with the following modules utilising a 'master-mix' method for 100 reactions: vector; pOGG026, PU module; *PsniifH* from pOGG043, SC module; sfGFP from pOGG037. The mix was distributed into a 96-well plate and the product from annealing the oligonucleotide Plasmid IDs was added (T module) (Fig. S5) according to the position designated in Table S7 to make individual clones (Fig. S6 and Fig. S7). Chemically competent *E. coli* ST18 cells were used for transformations with 5-aminolevulinic acid (ALA) added to all media (final concentration 50  $\mu\text{g mL}^{-1}$ ).

### **High-throughput conjugation from *E. coli* into rhizobial strains in 96-well microtiter plates**

Rhizobial strains to be conjugated (recipients) were inoculated into a 96-deep-well plate with 1.2 ml of media and relevant antibiotics, then covered with a sterile hydrophobic porous sealing film to reduce contamination. Strains were grown in a shaking incubator, 150 rpm at 28°C for 3 d. This plate was used for re-inoculation of 5 plates to allow concentration of a high number of cells. The day before the conjugation, *E. coli* ST18 (donor strain) was inoculated into 96-deep-well plate with 1.2 ml of media, relevant antibiotics and ALA, and covered with film. Strains were grown in a shaking incubator, 150 rpm at 37°C. On the day of the conjugation experiment, all plates were centrifuged at 4000 rpm for 15 min. The five rhizobial pellets were combined into a single plate to concentrate the bacterial cells. The final plate with rhizobial strains and that with *E. coli* ST18 were washed with fresh media three times to remove any traces of antibiotics. The final pellets were resuspended in 1.2 ml of TY media. In a PCR plate, 100  $\mu\text{l}$  donor was mixed with 100  $\mu\text{l}$  recipient and spun down at 4,000 rpm for 15 min. The supernatant was discarded, and pellet re-suspended in 30  $\mu\text{l}$  of TY-ALA media. The re-suspended mix was transferred to a microtiter plate with 150  $\mu\text{l}$  of TY-ALA agar and covered with film. The plate was incubated for 48 h at 28°C. 100  $\mu\text{l}$  TY was added to the bacteria microfilm growing on top of the agar and transferred to a 96-deep-well plate with 1.5 ml of TY media and relevant antibiotics. To have better aeration which results in an increase of bacterial growth, we prepared each 96-deep-well plate with a TY agar slope in each of the well. The 96-deep-well plate was incubated in a shaking incubator, 150 rpm at 28°C for 3 d. Serial dilutions were done and 100  $\mu\text{l}$  of each conjugation was plated onto TY agar (with relevant antibiotics) to get single colonies. Single colonies were re-grown in a 96-deep-well plate with TY liquid media with relevant antibiotics in a shaking incubator, 150 rpm at 28 °C for 3 d. OD<sub>600</sub> of a 200  $\mu\text{l}$  sample from each well was measured to confirm bacterial growth (where OD<sub>600</sub> 1.0 =  $1 \times 10^9$  cfu) using a FLUOStar Omega Microplate Reader (BMG). To eliminate possible spontaneous resistance to relevant antibiotics, positive plasmid acquisition was verified by colony PCR. Final conjugations shown in Fig. S13.

### **Primer design for multiplex Ion Torrent sequencing strategy**

We designed primers (Table S4) for a two-step polymerase chain reaction (PCR) (4) taking into account the following restrictions: 1) First-step PCR primers needed to add specific barcodes to our amplicon sequence with the aim of identifying column and row samples in a 96-well plate, 2) should insert 'landing pads' for the second-step PCR preventing hairpin formation or binding to our amplicon sequence, 3) Second-step forward primers should add Ion Xpress™ Barcodes for library identification, 4) Second-step reverse primer should introduce the trP1 sequencing adapter and 5) the final sequencing template should not exceed 200bp in length. The size of the First-step PCR forward primers was minimized to include only 18 nt from the original 29 nt of the 'landing pad' compatible with Second-step PCR Forward primers. A landing pad for synthetic sequences was designed based on the Illumina Nextera transposase sequence (5). All primers were analyzed *in silico* as individual units and as a complete sequence, and no hairpin formations were found with up to five mismatches.

### **Ion Torrent sequencing and analysis**

Sequencing results were analysed following the workflow in Fig. S8. Pre-processing steps were carried out with Trimmomatic-0.36 (6). We developed a Python script including the Biopython (7) and Pandas (8) libraries (Fig. S9) to separate and count the reads by amplicon (Plasmid ID) and sample-specific (primer barcodes). Script available in: [script available in: https://github.com/marcelamendoza/Plasmid-ID](https://github.com/marcelamendoza/Plasmid-ID).

Data manipulation was carried out in Microsoft Excel using PivotTables. After the high-quality filtering, where no mismatches were allowed, all samples identified with reads below 2% of the total number of unique sequences were removed to reduce false positive reads (9).

### **Extraction of DNA from nodules**

Protocol used was modified from that of (10). Nodules were crushed in Eppendorf tubes and alkaline PEG 200 added at 10× sample volume. Samples were incubated for 15 min at 60°C and vortexed. Plant tissue was precipitated at 1,000 rpm for 15 min. The supernatant was transferred to sterile PCR-tubes and used in a 20 - 50 µL PCR reaction.

### **General plant growth**

*P. sativum* cv. Aveola (Thompson and Morgan, UK), common bean (Tendergreen) (Thompson and Morgan, UK) white clover and soybean seeds were surface-sterilized by immersing in 95% ethanol for 30 sec, followed by washing with sterile water. Seeds were then immersed in 2% sodium hypochlorite for 5 min. After washing the seeds 5× with sterile water, they were placed onto 1% DWA plates and incubated in the dark at room temperature for 4-5 d. Alfalfa seeds were sterilized with 75% ethanol for 45 min with

continuous mixing, followed by washing with sterile water, and 2% sodium hypochlorite for 15 min with continuous mixing. After washing the seeds several times with sterile water, these were placed onto DWA plates and placed in the dark at room temperature for 2 d. Seedlings were placed in sterile 1 L pots with medium vermiculite and supplied with 400 ml nitrogen-free rooting solution (11). Common bean and soybean were grown in fine vermiculite and supplied with 400 ml of bean nitrogen-free rooting solution. The inoculation was approximately  $1 \times 10^7$  cfu of rhizobial strain per pot. Plants without inoculation were grown as a negative control (water control - WC). Plants were grown (random positioning of pots) in a controlled growth chamber at 21°C, 16-h/8-h day/night cycle. Alfalfa, white clover and pea plants were harvested at 21 dpi. Common bean and soybean plants were harvested at 42 dpi.

### **Competition assay: co-inoculation with two strains**

*Rhizobium* cultures to be used as inoculum were grown to early stationary phase ( $OD_{600} < 0.6 - 0.8$ ). Cultures were adjusted to 1000 cfu/ml. An inoculum mix was prepared with approx. 1000 cfu in total of three different inoculation ratios: 10:1, 1:1 and 1:10 strain A vs strain B. This mix was added to 75 ml 2.6× concentrated nitrogen-free rooting solution (11) and distributed homogeneously into 500 ml sterile pots with a mix of 50% silver sand/fine vermiculite. Similar sized 5-d old pea seedlings were transferred to pre-inoculated pots. Plants without inoculum were grown as a negative control (Water Control or WC). Plants were harvested at 21 dpi and were sequentially stained first with Magenta-glcA and then with X-gal after thermal treatment of 1 h at 70°C (12).

### **Assessment of Effectiveness at N<sub>2</sub>-fixation**

Full methodology described in (13). For measurement of shoot DW, pea plants were grown for 6 wk in 2-L pots. Shoots were cut, placed in paper envelopes and dried at 70 °C for 48 h. Dried shoots were weighed using an Acculab Sartorius Group scale model ALC-80-40.

### **Analysis of agricultural soil for competition assays**

Soil was dried at room temperature for 2 wk, then mixed thoroughly and removed stones with a 5 mm pore-diameter sieve. Soil samples were sent to James Hutton Limited (Aberdeen, Scotland) where they were stored at 4°C on receipt. A sub-sample was obtained and air dried (30°C) prior to sieving to pass a 2mm aperture. Determination of soil pH and elemental concentrations extracted with 0.43M acetic acid were obtained from the air-dry soil. Elemental concentrations were determined using inductively coupled plasma–optical emission spectroscopy (ICP-OES). Nitrate and ammonium concentrations were obtained using colourimetry after extraction of the field moist soil with 1 M KCl. The moisture content of both the air-dried (30°C) and field moist soil were determined at 105°C (Table S8).

### **Most probable number (MPN) of indigenous rhizobia from Yatesbury soil**

Full methodology described in (13). Surface-sterilized pea (Avolar) seeds were placed in boiling tubes filled with sterile fine vermiculite and 20 ml nitrogen-free rooting solution (4 biological replicates) (11). WC for each dilution was placed randomly amongst the inoculated plants. Pea plants were harvested at 21 dpi and assessed for the presence (nodulation-positive) or absence (nodulation-negative) of nodules.

### **Image acquisition for green and red fluorescence expression**

Samples were exposed for 1 s with filters for GFP (excitation 475/20 nm and emission 520/10 nm) and mCherry (excitation 550/10 nm and emission 620/10 nm). All images were analyzed with the software IndiGO (Berthold Technologies).

### **Image acquisition for a full root system (peas)**

For a full root system, a blue-light transilluminator (VWR) together with a Kodak Wratten Gelatine Filter no 49 were used. All images were analysed with the software IndiGO (Berthold Technologies). To assess root systems that had nodules formed by indigenous rhizobia and nodules formed by tagged-strains expressing GFP, roots were exposed to a blue-light transilluminator. A mobile phone camera with an orange filter was used to photograph fluorescent nodules. Nodules were counted using open-source image analysis Fiji (14).

### **Confocal microscopy for bacteroids analysis**

Pea nodules (42 dpi) were crushed and resuspended in 200 µl of water. 20 µl was placed on a microscope slide to analyse individual bacteroids. A GFP TIF image stack was loaded into MorphoGraphX (15), filtered using a Gaussian Blur Filter with a radius of 0.1 µm, and converted into a binary stack (threshold: 800). Meshes were generated using the Marching Cubes Algorithm at a cube spacing of 0.1 µm (3x smoothing) to obtain the volume of individual bacteroids. Individual bacteroids were color-identified according to volume.

## SUPPORTING INFORMATION

Table S1. Strains and plasmids used in this study.

| Strain                        | Details                                                                                                                                    | Source        |
|-------------------------------|--------------------------------------------------------------------------------------------------------------------------------------------|---------------|
| <b><i>E. coli</i> strains</b> |                                                                                                                                            |               |
| <b>α-Select Gold</b>          | Competent cells. Genotype: F - <i>deoR endA1 recA1 relA1 gyrA96 hsdR17(rk -, mk +) supE44 thi-1 phoA Δ(lacZYA argF)U169 Φ80lacZΔM15λ</i> - | Bioline       |
| <b>DH5α</b>                   | Competent cells. Genotype: F- <i>Φ80lacZΔM15 Δ(lacZYA-argF) U169 recA1 endA1 hsdR17(rk-, mk+) phoA supE44 thi-1 gyrA96 relA1 λ-</i>        | Invitrogen    |
| <b>ST18</b>                   | S17 <i>Δpir Δhema</i>                                                                                                                      | (16)          |
| <b>Rhizobial strains</b>      |                                                                                                                                            |               |
| <b>Rlv3841</b>                | <i>Rhizobium leguminosarum</i> bv. <i>viciae</i> , derivative of strain 300, Str <sup>r</sup>                                              | (17)          |
| <b>RlvA34</b>                 | <i>R. leguminosarum</i> bv. <i>viciae</i> , Str <sup>r</sup>                                                                               | (18)          |
| <b>CFN42</b>                  | <i>Rhizobium etli</i>                                                                                                                      | (19)          |
| <b>CIAT899</b>                | <i>Rhizobium tropici</i> , Rf <sup>r</sup>                                                                                                 | (20)          |
| <b>4292</b>                   | <i>R. leguminosarum</i> bv. <i>phaseoli</i> , Rf <sup>r</sup>                                                                              | (18)          |
| <b>WSM1325</b>                | <i>R. leguminosarum</i> bv. <i>trifolii</i>                                                                                                | (21)          |
| <b>WSM419</b>                 | <i>Sinorhizobium medicae</i>                                                                                                               | (22)          |
| <b>HH103</b>                  | <i>Sinorhizobium fredii</i>                                                                                                                | (23)          |
| <b>WSM1521</b>                | Host of origin: <i>Lathyrus</i> . Effectiveness class in pea: high, Nit <sup>r</sup>                                                       | John Howieson |
| <b>54 n4</b>                  | Host of origin: <i>P. sativum</i> . Effectiveness class in pea: high, Nit <sup>r</sup>                                                     | John Howieson |
| <b>60 n1</b>                  | Host of origin: <i>P. sativum</i> . Effectiveness class in pea: medium, Nit <sup>r</sup>                                                   | John Howieson |
| <b>71 n4</b>                  | Host of origin: <i>P. sativum</i> . Effectiveness class in pea: medium, Nit <sup>r</sup>                                                   | John Howieson |
| <b>SARDI 962</b>              | Host of origin: <i>P. sativum</i> . Effectiveness class in pea: low, Nit <sup>r</sup>                                                      | John Howieson |
| <b>SU303</b>                  | Host of origin: unknown. Effectiveness class in pea: high, Nit <sup>r</sup>                                                                | John Howieson |
| <b>WSM1455</b>                | Host of origin: <i>V. faba</i> . Effectiveness class in pea: medium, Nit <sup>r</sup>                                                      | John Howieson |
| <b>WSM1475</b>                | Host of origin: <i>V. faba</i> . Effectiveness class in pea: medium, Nit <sup>r</sup>                                                      | John Howieson |
| <b>WSM1480</b>                | Host of origin: <i>V. faba</i> . Effectiveness class in pea: medium, Nit <sup>r</sup>                                                      | John Howieson |
| <b>WSM1481</b>                | Host of origin: <i>Vicia</i> spp. Effectiveness class in pea: low, Nit <sup>r</sup>                                                        | John Howieson |
| <b>WSM1488</b>                | Host of origin: <i>V. faba</i> . Effectiveness class in pea: low, Nit <sup>r</sup>                                                         | John Howieson |
| <b>WSM1529</b>                | Host of origin: <i>V. faba</i> . Effectiveness class in pea: high, Nit <sup>r</sup>                                                        | John Howieson |
| <b>WSM4458</b>                | Host of origin: <i>P. sativum</i> . Effectiveness class in pea: low, Nit <sup>r</sup>                                                      | John Howieson |
| <b>WSM4459</b>                | Host of origin: <i>P. sativum</i> . Effectiveness class in pea: low, Nit <sup>r</sup>                                                      | John Howieson |

|                          |                                                                                          |               |
|--------------------------|------------------------------------------------------------------------------------------|---------------|
| <b>WSM4460</b>           | Host of origin: <i>P. sativum</i> . Effectiveness class in pea: medium, Nit <sup>f</sup> | John Howieson |
| <b>WSM4461</b>           | Host of origin: <i>P. sativum</i> . Effectiveness class in pea: high, Nit <sup>f</sup>   | John Howieson |
| <b>WSM4462</b>           | Host of origin: <i>P. sativum</i> . Effectiveness class in pea: low, Nit <sup>f</sup>    | John Howieson |
| <b>WSM4645</b>           | Host of origin: <i>P. sativum</i> . Effectiveness class in pea: high, Nit <sup>f</sup>   | John Howieson |
| <b>WSM937</b>            | Effectiveness class in pea: high, Nit <sup>f</sup>                                       | John Howieson |
| <b>3841<i>celB</i></b>   | <i>R. leguminosarum</i> bv. <i>viciae</i> , Str <sup>f</sup>                             | (24)          |
| <b>UPM791<i>gusA</i></b> | <i>R. leguminosarum</i> bv. <i>viciae</i> , Str <sup>f</sup>                             | (24)          |
| <b>UPM791</b>            | <i>R. leguminosarum</i> bv. <i>viciae</i> , Str <sup>f</sup>                             | (24)          |
| <b>VSX1</b>              | <i>R. leguminosarum</i> bv. <i>viciae</i> , Nit <sup>f</sup>                             | (25)          |
| <b>VXS7</b>              | <i>R. leguminosarum</i> bv. <i>viciae</i> , Nit <sup>f</sup>                             | (25)          |
| <b>VSX10</b>             | <i>R. leguminosarum</i> bv. <i>viciae</i> , Nit <sup>f</sup>                             | (25)          |
| <b>VSX11</b>             | <i>R. leguminosarum</i> bv. <i>viciae</i> , Nit <sup>f</sup>                             | (25)          |
| <b>VSX16</b>             | <i>R. leguminosarum</i> bv. <i>viciae</i> , Nit <sup>f</sup>                             | (25)          |
| <b>VSX28</b>             | <i>R. leguminosarum</i> bv. <i>viciae</i> , Nit <sup>f</sup>                             | (25)          |
| <b>VSX32</b>             | <i>R. leguminosarum</i> bv. <i>viciae</i> , Nit <sup>f</sup>                             | (25)          |
| <b>13</b>                | <i>Rhizobium</i> sp., Nit <sup>f</sup>                                                   | Euan James    |
| <b>23_1</b>              | <i>Rhizobium</i> sp., Nit <sup>f</sup>                                                   | Euan James    |
| <b>24</b>                | <i>Rhizobium</i> sp., Nit <sup>f</sup>                                                   | Euan James    |
| <b>263</b>               | <i>Rhizobium</i> sp., Nit <sup>f</sup>                                                   | Euan James    |
| <b>2B-1</b>              | <i>Rhizobium</i> sp., Nit <sup>f</sup>                                                   | Euan James    |
| <b>364</b>               | <i>Rhizobium</i> sp., Nit <sup>f</sup>                                                   | Euan James    |
| <b>367</b>               | <i>Rhizobium</i> sp., Nit <sup>f</sup>                                                   | Euan James    |
| <b>370</b>               | <i>Rhizobium</i> sp., Nit <sup>f</sup>                                                   | Euan James    |
| <b>387</b>               | <i>Rhizobium</i> sp., Nit <sup>f</sup>                                                   | Euan James    |
| <b>388</b>               | <i>Rhizobium</i> sp., Nit <sup>f</sup>                                                   | Euan James    |
| <b>42</b>                | <i>Rhizobium</i> sp., Nit <sup>f</sup>                                                   | Euan James    |
| <b>535</b>               | <i>Rhizobium</i> sp., Nit <sup>f</sup>                                                   | Euan James    |
| <b>536</b>               | <i>Rhizobium</i> sp., Nit <sup>f</sup>                                                   | Euan James    |
| <b>585</b>               | <i>Rhizobium</i> sp., Nit <sup>f</sup>                                                   | Euan James    |
| <b>CellTech</b>          | <i>Rhizobium</i> sp., Nit <sup>f</sup>                                                   | Euan James    |
| <b>Corus 1+2 1-1</b>     | <i>Rhizobium</i> sp., Nit <sup>f</sup>                                                   | Euan James    |
| <b>Corus 16 2-2</b>      | <i>Rhizobium</i> sp., Nit <sup>f</sup>                                                   | Euan James    |
| <b>E2-1A</b>             | <i>Rhizobium</i> sp., Nit <sup>f</sup>                                                   | Euan James    |
| <b>E2-1B</b>             | <i>Rhizobium</i> sp., Nit <sup>f</sup>                                                   | Euan James    |
| <b>JED2</b>              | <i>Rhizobium</i> sp., Nit <sup>f</sup>                                                   | Euan James    |
| <b>LA-2A</b>             | <i>Rhizobium</i> sp., Nit <sup>f</sup>                                                   | Euan James    |
| <b>LegTech</b>           | <i>Rhizobium</i> sp., Nit <sup>f</sup>                                                   | Euan James    |
| <b>Magnus 1+2 (2)</b>    | <i>Rhizobium</i> sp., Nit <sup>f</sup>                                                   | Euan James    |
| <b>Magnus 16 (2)</b>     | <i>Rhizobium</i> sp., Nit <sup>f</sup>                                                   | Euan James    |
| <b>PB3-3</b>             | <i>Rhizobium</i> sp., Nit <sup>f</sup>                                                   | Euan James    |
| <b>PB6-3B</b>            | <i>Rhizobium</i> sp., Nit <sup>f</sup>                                                   | Euan James    |
| <b>PEA NW</b>            | <i>Rhizobium</i> sp., Nit <sup>f</sup>                                                   | Euan James    |



|             |                                                                    |            |
|-------------|--------------------------------------------------------------------|------------|
| <b>VF2</b>  | <i>Rhizobium</i> sp., Nit <sup>r</sup>                             | Euan James |
| <b>VF5</b>  | <i>Rhizobium</i> sp., Nit <sup>r</sup>                             | Euan James |
| <b>G004</b> | Isolated using legume host: <i>P. sativum</i> , Nit <sup>r</sup>   | (26)       |
| <b>G007</b> | Isolated using legume host: <i>P. sativum</i> , Nit <sup>r</sup>   | (26)       |
| <b>G008</b> | Isolated using legume host: <i>P. sativum</i> , Nit <sup>r</sup>   | (26)       |
| <b>G011</b> | Isolated using legume host: <i>P. sativum</i> , Nit <sup>r</sup>   | (26)       |
| <b>G016</b> | Isolated using legume host: <i>P. sativum</i> , Nit <sup>r</sup>   | (26)       |
| <b>G028</b> | Isolated using legume host: <i>P. sativum</i> , Nit <sup>r</sup>   | (26)       |
| <b>G051</b> | Isolated using legume host: <i>P. sativum</i> , Nit <sup>r</sup>   | (26)       |
| <b>G067</b> | Isolated using legume host: <i>P. sativum</i> , Nit <sup>r</sup>   | (26)       |
| <b>G073</b> | Isolated using legume host: <i>P. sativum</i> , Nit <sup>r</sup>   | (26)       |
| <b>G077</b> | Isolated using legume host: <i>P. sativum</i> , Nit <sup>r</sup>   | (26)       |
| <b>G083</b> | Isolated using legume host: <i>P. sativum</i> , Nit <sup>r</sup>   | (26)       |
| <b>G088</b> | Isolated using legume host: <i>P. sativum</i> , Nit <sup>r</sup>   | (26)       |
| <b>G093</b> | Isolated using legume host: <i>P. sativum</i> , Nit <sup>r</sup>   | (26)       |
| <b>G094</b> | Isolated using legume host: <i>P. sativum</i> , Nit <sup>r</sup>   | (26)       |
| <b>G099</b> | Isolated using legume host: <i>P. sativum</i> , Nit <sup>r</sup>   | (26)       |
| <b>G108</b> | Isolated using legume host: <i>P. sativum</i> , Nit <sup>r</sup>   | (26)       |
| <b>G109</b> | Isolated using legume host: <i>P. sativum</i> , Nit <sup>r</sup>   | (26)       |
| <b>H005</b> | Isolated using legume host: <i>V. faba</i> , Nit <sup>r</sup>      | (26)       |
| <b>H009</b> | Isolated using legume host: <i>V. faba</i> , Nit <sup>r</sup>      | (26)       |
| <b>H011</b> | Isolated using legume host: <i>V. faba</i> , Nit <sup>r</sup>      | (26)       |
| <b>H012</b> | Isolated using legume host: <i>V. faba</i> , Nit <sup>r</sup>      | (26)       |
| <b>H031</b> | Isolated using legume host: <i>V. faba</i> , Nit <sup>r</sup>      | (26)       |
| <b>H082</b> | Isolated using legume host: <i>V. faba</i> , Nit <sup>r</sup>      | (26)       |
| <b>H127</b> | Isolated using legume host: <i>V. faba</i> , Nit <sup>r</sup>      | (26)       |
| <b>H130</b> | Isolated using legume host: <i>V. faba</i> , Nit <sup>r</sup>      | (26)       |
| <b>H174</b> | Isolated using legume host: <i>V. faba</i> , Nit <sup>r</sup>      | (26)       |
| <b>H178</b> | Isolated using legume host: <i>V. faba</i> , Nit <sup>r</sup>      | (26)       |
| <b>L002</b> | Isolated using legume host: <i>L. culinaris</i> , Nit <sup>r</sup> | (26)       |
| <b>L008</b> | Isolated using legume host: <i>L. culinaris</i> , Nit <sup>r</sup> | (26)       |
| <b>L010</b> | Isolated using legume host: <i>L. culinaris</i> , Nit <sup>r</sup> | (26)       |
| <b>L018</b> | Isolated using legume host: <i>L. culinaris</i> , Nit <sup>r</sup> | (26)       |
| <b>L019</b> | Isolated using legume host: <i>L. culinaris</i> , Nit <sup>r</sup> | (26)       |
| <b>L070</b> | Isolated using legume host: <i>L. culinaris</i> , Nit <sup>r</sup> | (26)       |
| <b>L074</b> | Isolated using legume host: <i>L. culinaris</i> , Nit <sup>r</sup> | (26)       |
| <b>L079</b> | Isolated using legume host: <i>L. culinaris</i> , Nit <sup>r</sup> | (26)       |
| <b>L082</b> | Isolated using legume host: <i>L. culinaris</i> , Nit <sup>r</sup> | (26)       |
| <b>L102</b> | Isolated using legume host: <i>L. culinaris</i> , Nit <sup>r</sup> | (26)       |
| <b>L104</b> | Isolated using legume host: <i>L. culinaris</i> , Nit <sup>r</sup> | (26)       |
| <b>L111</b> | Isolated using legume host: <i>L. culinaris</i> , Nit <sup>r</sup> | (26)       |
| <b>L117</b> | Isolated using legume host: <i>L. culinaris</i> , Nit <sup>r</sup> | (26)       |
| <b>V002</b> | Isolated using legume host: <i>V. sativa</i> , Nit <sup>r</sup>    | (26)       |
| <b>V004</b> | Isolated using legume host: <i>V. sativa</i> , Nit <sup>r</sup>    | (26)       |
| <b>V006</b> | Isolated using legume host: <i>V. sativa</i> , Nit <sup>r</sup>    | (26)       |

|                |                                                                                            |           |
|----------------|--------------------------------------------------------------------------------------------|-----------|
| <b>V008</b>    | Isolated using legume host: <i>V. sativa</i> , Nit <sup>r</sup>                            | (26)      |
| <b>V010</b>    | Isolated using legume host: <i>V. sativa</i> , Nit <sup>r</sup>                            | (26)      |
| <b>V014</b>    | Isolated using legume host: <i>V. sativa</i> , Nit <sup>r</sup>                            | (26)      |
| <b>V030</b>    | Isolated using legume host: <i>V. sativa</i> , Nit <sup>r</sup>                            | (26)      |
| <b>V043</b>    | Isolated using legume host: <i>V. sativa</i> , Nit <sup>r</sup>                            | (26)      |
| <b>V050</b>    | Isolated using legume host: <i>V. sativa</i> , Nit <sup>r</sup>                            | (26)      |
| <b>V057</b>    | Isolated using legume host: <i>V. sativa</i> , Nit <sup>r</sup>                            | (26)      |
| <b>V060</b>    | Isolated using legume host: <i>V. sativa</i> , Nit <sup>r</sup>                            | (26)      |
| <b>V067</b>    | Isolated using legume host: <i>V. sativa</i> , Nit <sup>r</sup>                            | (26)      |
| <b>V068</b>    | Isolated using legume host: <i>V. sativa</i> , Nit <sup>r</sup>                            | (26)      |
| <b>V069</b>    | Isolated using legume host: <i>V. sativa</i> , Nit <sup>r</sup>                            | (26)      |
| <b>V074</b>    | Isolated using legume host: <i>V. sativa</i> , Nit <sup>r</sup>                            | (26)      |
| <b>V100</b>    | Isolated using legume host: <i>V. sativa</i> , Nit <sup>r</sup>                            | (26)      |
| <b>V116</b>    | Isolated using legume host: <i>V. sativa</i> , Nit <sup>r</sup>                            | (26)      |
| <b>OPS0657</b> | Rlv3841[pOPS0253], Kan <sup>r</sup> /Nm <sup>r</sup> , Str <sup>r</sup>                    | This work |
| <b>OPS0658</b> | Rlv3841[pOPS0254], Kan <sup>r</sup> /Nm <sup>r</sup> , Str <sup>r</sup>                    | This work |
| <b>OPS0660</b> | Rlv3841[pOPS0263], Kan <sup>r</sup> /Nm <sup>r</sup> , Str <sup>r</sup>                    | This work |
| <b>OPS0717</b> | HH103[pOPS0262], Kan <sup>r</sup> /Nm <sup>r</sup> , Nit <sup>r</sup>                      | This work |
| <b>OPS0718</b> | HH103[pOPS0263], Kan <sup>r</sup> /Nm <sup>r</sup> , Nit <sup>r</sup>                      | This work |
| <b>OPS0719</b> | CFN42[pOPS0262], Kan <sup>r</sup> /Nm <sup>r</sup> , Nit <sup>r</sup>                      | This work |
| <b>OPS0720</b> | CFN42[pOPS0263], Kan <sup>r</sup> /Nm <sup>r</sup> , Nit <sup>r</sup>                      | This work |
| <b>OPS0721</b> | WSM419[pOPS0262], Kan <sup>r</sup> /Nm <sup>r</sup> , Chl <sup>r</sup>                     | This work |
| <b>OPS0722</b> | WSM419[pOPS0263], Kan <sup>r</sup> /Nm <sup>r</sup> , Chl <sup>r</sup>                     | This work |
| <b>OPS0723</b> | Sm1022[pOPS0262], Kan <sup>r</sup> /Nm <sup>r</sup> , Chl <sup>r</sup>                     | This work |
| <b>OPS0724</b> | Sm1022[pOPS0263], Kan <sup>r</sup> /Nm <sup>r</sup> , Chl <sup>r</sup>                     | This work |
| <b>OPS0725</b> | Sm1021[pOPS0262], Kan <sup>r</sup> /Nm <sup>r</sup> , Str <sup>r</sup>                     | This work |
| <b>OPS0726</b> | Sm1021[pOPS0263], Kan <sup>r</sup> /Nm <sup>r</sup> , Str <sup>r</sup>                     | This work |
| <b>OPS0729</b> | RlvA34[pOPS0262], Kan <sup>r</sup> /Nm <sup>r</sup> , Str <sup>r</sup>                     | This work |
| <b>OPS0730</b> | RlvA34[pOPS0263], Kan <sup>r</sup> /Nm <sup>r</sup> , Str <sup>r</sup>                     | This work |
| <b>OPS0731</b> | RI bv. <i>phaseoli</i> 4292[pOPS0262], Kan <sup>r</sup> /Nm <sup>r</sup> , Rf <sup>r</sup> | This work |
| <b>OPS0732</b> | RI bv. <i>phaseoli</i> 4292[pOPS0263], Kan <sup>r</sup> /Nm <sup>r</sup> , Rf <sup>r</sup> | This work |
| <b>OPS0733</b> | CIAT899[pOPS0262], Kan <sup>r</sup> /Nm <sup>r</sup> , Rf <sup>r</sup>                     | This work |
| <b>OPS0734</b> | CIAT899[pOPS0263], Kan <sup>r</sup> /Nm <sup>r</sup> , Rf <sup>r</sup>                     | This work |
| <b>OPS0736</b> | WSM1325[pOPS0262], Kan <sup>r</sup> /Nm <sup>r</sup> , Nit <sup>r</sup>                    | This work |
| <b>OPS0737</b> | WSM1325[pOPS0263], Kan <sup>r</sup> /Nm <sup>r</sup> , Nit <sup>r</sup>                    | This work |
| <b>OPS0738</b> | Rlv3841[pOPS0262], Kan <sup>r</sup> /Nm <sup>r</sup> , Str <sup>r</sup>                    | This work |
| <b>OPS0816</b> | Rlv3841[pOPS0314], Kan <sup>r</sup> /Nm <sup>r</sup> , Str <sup>r</sup>                    | This work |
| <b>OPS0842</b> | WSM1488[pLMB640], Tet <sup>r</sup> , Nit <sup>r</sup>                                      | This work |
| <b>OPS0845</b> | WSM1481[pLMB640], Tet <sup>r</sup> , Nit <sup>r</sup>                                      | This work |
| <b>OPS0852</b> | UPM791[pLMB640], Tet <sup>r</sup> , Str <sup>r</sup>                                       | This work |
| <b>OPS0898</b> | Rlv3841[pOPS0384], Kan <sup>r</sup> /Nm <sup>r</sup> , Str <sup>r</sup>                    | This work |
| <b>OPS0899</b> | Rlv3841[pOPS0378], Kan <sup>r</sup> /Nm <sup>r</sup> , Str <sup>r</sup>                    | This work |
| <b>OPS0900</b> | Rlv3841[pOPS0380], Kan <sup>r</sup> /Nm <sup>r</sup> , Str <sup>r</sup>                    | This work |
| <b>OPS0901</b> | Rlv3841[pOPS0382], Kan <sup>r</sup> /Nm <sup>r</sup> , Str <sup>r</sup>                    | This work |
| <b>OPS0902</b> | Rlv3841[pOPS0383], Kan <sup>r</sup> /Nm <sup>r</sup> , Str <sup>r</sup>                    | This work |

|                      |                                                                                 |           |
|----------------------|---------------------------------------------------------------------------------|-----------|
| <b>OPS0903</b>       | Rlv3841[pOPS0377], Kan <sup>r</sup> /Nm <sup>r</sup> , Str <sup>r</sup>         | This work |
| <b>OPS0904</b>       | Rlv3841[pOPS0379], Kan <sup>r</sup> /Nm <sup>r</sup> , Str <sup>r</sup>         | This work |
| <b>OPS0905</b>       | Rlv3841[pOPS0381], Kan <sup>r</sup> /Nm <sup>r</sup> , Str <sup>r</sup>         | This work |
| <b>OPS1086</b>       | Rlv3841[pOPS0750], Kan <sup>r</sup> /Nm <sup>r</sup> , Str <sup>r</sup>         | This work |
| <b>OPS1087</b>       | UPM791[pOPS0750], Kan <sup>r</sup> /Nm <sup>r</sup> , Str <sup>r</sup>          | This work |
| <b>OPS1511</b>       | Rlv3841[pOPS0385], Kan <sup>r</sup> /Nm <sup>r</sup> , Str <sup>r</sup>         | This work |
| <b>OPS1511</b>       | Rlv3841[pOPS0385], Kan <sup>r</sup> /Nm <sup>r</sup> , Str <sup>r</sup>         | This work |
| <b>OPS1512</b>       | Rlv3841[pOPS0387], Kan <sup>r</sup> /Nm <sup>r</sup> , Str <sup>r</sup>         | This work |
| <b>OPS1513</b>       | Rlv3841[pOPS0386], Kan <sup>r</sup> /Nm <sup>r</sup> , Str <sup>r</sup>         | This work |
| <b>OPS1514</b>       | UPM791gusA[pOPS0548], Kan <sup>r</sup> /Nm <sup>r</sup> , Str <sup>r</sup>      | This work |
| <b>OPS1515</b>       | Rlv3841celB[pOPS0564], Kan <sup>r</sup> /Nm <sup>r</sup> , Str <sup>r</sup>     | This work |
| <b>OPS1516</b>       | Rlv3841[pOPS0491], Kan <sup>r</sup> /Nm <sup>r</sup> , Str <sup>r</sup>         | This work |
| <b>OPS1517</b>       | Rlv3841[pOPS0503], Kan <sup>r</sup> /Nm <sup>r</sup> , Str <sup>r</sup>         | This work |
| <b>OPS1518</b>       | UPM791[pOPS0491], Kan <sup>r</sup> /Nm <sup>r</sup> , Str <sup>r</sup>          | This work |
| <b>OPS1519</b>       | UPM791[pOPS0503], Kan <sup>r</sup> /Nm <sup>r</sup> , Str <sup>r</sup>          | This work |
| <b>OPS1520</b>       | WSM1521[pOPS0383], Kan <sup>r</sup> /Nm <sup>r</sup> , Str <sup>r</sup>         | This work |
| <b>OPS1521</b>       | WSM1481[pOPS0383], Kan <sup>r</sup> /Nm <sup>r</sup> , Str <sup>r</sup>         | This work |
| <b>OPS1522</b>       | WSM1475[pOPS0515], Kan <sup>r</sup> /Nm <sup>r</sup> , Str <sup>r</sup>         | This work |
| <b>OPS1523</b>       | WSM1529[pOPS0539], Kan <sup>r</sup> /Nm <sup>r</sup> , Str <sup>r</sup>         | This work |
| <b>OPS1524</b>       | WSM1521[pOPS0504], Kan <sup>r</sup> /Nm <sup>r</sup> , Str <sup>r</sup>         | This work |
| <b>OPS1525</b>       | WSM1481[pOPS0527], Kan <sup>r</sup> /Nm <sup>r</sup> , Str <sup>r</sup>         | This work |
| <b>OPS1526</b>       | Rlv SU303[pOPS0383], Kan <sup>r</sup> /Nm <sup>r</sup> , Str <sup>r</sup>       | This work |
| <b>13 [pOPS0515]</b> | LB-ID 13[pOPS0515], Kan <sup>r</sup> /Nm <sup>r</sup> , Nit <sup>r</sup>        | This work |
| <b>23--1</b>         | LB-ID 23--1[pOPS0522], Kan <sup>r</sup> /Nm <sup>r</sup> , Nit <sup>r</sup>     | This work |
| <b>[pOPS0522]</b>    |                                                                                 |           |
| <b>24 [pOPS0539]</b> | LB-ID 24[pOPS0539], Kan <sup>r</sup> /Nm <sup>r</sup> , Nit <sup>r</sup>        | This work |
| <b>2B-1</b>          | LB-ID 2B-1[pOPS0570], Kan <sup>r</sup> /Nm <sup>r</sup> , Nit <sup>r</sup>      | This work |
| <b>[pOPS0570]</b>    |                                                                                 |           |
| <b>364</b>           | LB-ID 364[pOPS0505], Kan <sup>r</sup> /Nm <sup>r</sup> , Nit <sup>r</sup>       | This work |
| <b>[pOPS0505]</b>    |                                                                                 |           |
| <b>367</b>           | LB-ID 367[pOPS0545], Kan <sup>r</sup> /Nm <sup>r</sup> , Nit <sup>r</sup>       | This work |
| <b>[pOPS0545]</b>    |                                                                                 |           |
| <b>387</b>           | LB-ID 387[pOPS0534], Kan <sup>r</sup> /Nm <sup>r</sup> , Nit <sup>r</sup>       | This work |
| <b>[pOPS0534]</b>    |                                                                                 |           |
| <b>536</b>           | LB-ID 536[pOPS0542], Kan <sup>r</sup> /Nm <sup>r</sup> , Nit <sup>r</sup>       | This work |
| <b>[pOPS0542]</b>    |                                                                                 |           |
| <b>CellTech</b>      | LB-ID CellTech[pOPS0503], Kan <sup>r</sup> /Nm <sup>r</sup> , Nit <sup>r</sup>  | This work |
| <b>[pOPS0503]</b>    |                                                                                 |           |
| <b>CORUS 1+2</b>     | LB-ID CORUS 1+2[pOPS0509], Kan <sup>r</sup> /Nm <sup>r</sup> , Nit <sup>r</sup> | This work |
| <b>[pOPS0509]</b>    |                                                                                 |           |
| <b>CORUS 16</b>      | LB-ID CORUS 16[pOPS0508], Kan <sup>r</sup> /Nm <sup>r</sup> , Nit <sup>r</sup>  | This work |
| <b>[pOPS0508]</b>    |                                                                                 |           |
| <b>E2-1A</b>         | LB-ID E2-1A[pOPS0582], Kan <sup>r</sup> /Nm <sup>r</sup> , Nit <sup>r</sup>     | This work |
| <b>[pOPS0582]</b>    |                                                                                 |           |
| <b>E2-1B</b>         | LB-ID E2-1B[pOPS0540], Kan <sup>r</sup> /Nm <sup>r</sup> , Nit <sup>r</sup>     | This work |
| <b>[pOPS0540]</b>    |                                                                                 |           |
| <b>G004</b>          | LB-ID G004 pOPS0519], Kan <sup>r</sup> /Nm <sup>r</sup> , Nit <sup>r</sup>      | This work |
| <b>[pOPS0519]</b>    |                                                                                 |           |
| <b>G007</b>          | LB-ID G007[pOPS0529], Kan <sup>r</sup> /Nm <sup>r</sup> , Nit <sup>r</sup>      | This work |
| <b>[pOPS0529]</b>    |                                                                                 |           |

|                   |                                                                            |           |
|-------------------|----------------------------------------------------------------------------|-----------|
| <b>G008</b>       | LB-ID G008[pOPS0532], Kan <sup>r</sup> /Nm <sup>r</sup> , Nit <sup>r</sup> | This work |
| <b>[pOPS0532]</b> |                                                                            |           |
| <b>G011</b>       | LB-ID G011[pOPS0501], Kan <sup>r</sup> /Nm <sup>r</sup> , Nit <sup>r</sup> | This work |
| <b>[pOPS0501]</b> |                                                                            |           |
| <b>G016</b>       | LB-ID G016[pOPS0571], Kan <sup>r</sup> /Nm <sup>r</sup> , Nit <sup>r</sup> | This work |
| <b>[pOPS0571]</b> |                                                                            |           |
| <b>G028</b>       | LB-ID G028[pOPS0566], Kan <sup>r</sup> /Nm <sup>r</sup> , Nit <sup>r</sup> | This work |
| <b>[pOPS0566]</b> |                                                                            |           |
| <b>G051</b>       | LB-ID G051[pOPS0530], Kan <sup>r</sup> /Nm <sup>r</sup> , Nit <sup>r</sup> | This work |
| <b>[pOPS0530]</b> |                                                                            |           |
| <b>G067</b>       | LB-ID G067[pOPS0567], Kan <sup>r</sup> /Nm <sup>r</sup> , Nit <sup>r</sup> | This work |
| <b>[pOPS0567]</b> |                                                                            |           |
| <b>G073</b>       | LB-ID G073[pOPS0521], Kan <sup>r</sup> /Nm <sup>r</sup> , Nit <sup>r</sup> | This work |
| <b>[pOPS0521]</b> |                                                                            |           |
| <b>G077</b>       | LB-ID G077[pOPS0520], Kan <sup>r</sup> /Nm <sup>r</sup> , Nit <sup>r</sup> | This work |
| <b>[pOPS0520]</b> |                                                                            |           |
| <b>G083</b>       | LB-ID G083[pOPS0553], Kan <sup>r</sup> /Nm <sup>r</sup> , Nit <sup>r</sup> | This work |
| <b>[pOPS0553]</b> |                                                                            |           |
| <b>G088</b>       | LB-ID G088[pOPS0568], Kan <sup>r</sup> /Nm <sup>r</sup> , Nit <sup>r</sup> | This work |
| <b>[pOPS0568]</b> |                                                                            |           |
| <b>G093</b>       | LB-ID G093[pOPS0551], Kan <sup>r</sup> /Nm <sup>r</sup> , Nit <sup>r</sup> | This work |
| <b>[pOPS0551]</b> |                                                                            |           |
| <b>G094</b>       | LB-ID G094[pOPS0556], Kan <sup>r</sup> /Nm <sup>r</sup> , Nit <sup>r</sup> | This work |
| <b>[pOPS0556]</b> |                                                                            |           |
| <b>G099</b>       | LB-ID G099[pOPS0552], Kan <sup>r</sup> /Nm <sup>r</sup> , Nit <sup>r</sup> | This work |
| <b>[pOPS0552]</b> |                                                                            |           |
| <b>G108</b>       | LB-ID G108[pOPS0555], Kan <sup>r</sup> /Nm <sup>r</sup> , Nit <sup>r</sup> | This work |
| <b>[pOPS0555]</b> |                                                                            |           |
| <b>G109</b>       | LB-ID G109[pOPS0554], Kan <sup>r</sup> /Nm <sup>r</sup> , Nit <sup>r</sup> | This work |
| <b>[pOPS0554]</b> |                                                                            |           |
| <b>H009</b>       | LB-ID H009[pOPS0536], Kan <sup>r</sup> /Nm <sup>r</sup> , Nit <sup>r</sup> | This work |
| <b>[pOPS0536]</b> |                                                                            |           |
| <b>H012</b>       | LB-ID H012[pOPS0524], Kan <sup>r</sup> /Nm <sup>r</sup> , Nit <sup>r</sup> | This work |
| <b>[pOPS0524]</b> |                                                                            |           |
| <b>H031</b>       | LB-ID H031[pOPS0584], Kan <sup>r</sup> /Nm <sup>r</sup> , Nit <sup>r</sup> | This work |
| <b>[pOPS0584]</b> |                                                                            |           |
| <b>H082</b>       | LB-ID H082[pOPS0564], Kan <sup>r</sup> /Nm <sup>r</sup> , Nit <sup>r</sup> | This work |
| <b>[pOPS0564]</b> |                                                                            |           |
| <b>H127</b>       | LB-ID H127[pOPS0548], Kan <sup>r</sup> /Nm <sup>r</sup> , Nit <sup>r</sup> | This work |
| <b>[pOPS0548]</b> |                                                                            |           |
| <b>H130</b>       | LB-ID H130[pOPS0560], Kan <sup>r</sup> /Nm <sup>r</sup> , Nit <sup>r</sup> | This work |
| <b>[pOPS0560]</b> |                                                                            |           |
| <b>H174</b>       | LB-ID H174[pOPS0565], Kan <sup>r</sup> /Nm <sup>r</sup> , Nit <sup>r</sup> | This work |
| <b>[pOPS0565]</b> |                                                                            |           |
| <b>H178</b>       | LB-ID H178[pOPS0572], Kan <sup>r</sup> /Nm <sup>r</sup> , Nit <sup>r</sup> | This work |
| <b>[pOPS0572]</b> |                                                                            |           |
| <b>JED2</b>       | LB-ID JED2[pOPS0504], Kan <sup>r</sup> /Nm <sup>r</sup> , Nit <sup>r</sup> | This work |
| <b>[pOPS0504]</b> |                                                                            |           |
| <b>L008</b>       | LB-ID L008[pOPS0557], Kan <sup>r</sup> /Nm <sup>r</sup> , Nit <sup>r</sup> | This work |
| <b>[pOPS0557]</b> |                                                                            |           |
| <b>L010</b>       | LB-ID L010[pOPS0575], Kan <sup>r</sup> /Nm <sup>r</sup> , Nit <sup>r</sup> | This work |
| <b>[pOPS0575]</b> |                                                                            |           |
| <b>L018</b>       | LB-ID L018[pOPS0576], Kan <sup>r</sup> /Nm <sup>r</sup> , Nit <sup>r</sup> | This work |
| <b>[pOPS0576]</b> |                                                                            |           |
| <b>L019</b>       | LB-ID L019[pOPS0558], Kan <sup>r</sup> /Nm <sup>r</sup> , Nit <sup>r</sup> | This work |
| <b>[pOPS0558]</b> |                                                                            |           |

|                   |                                                                               |           |
|-------------------|-------------------------------------------------------------------------------|-----------|
| <b>L070</b>       | LB-ID L070[pOPS0577], Kan <sup>r</sup> /Nm <sup>r</sup> , Nit <sup>r</sup>    | This work |
| <b>[pOPS0577]</b> |                                                                               |           |
| <b>L074</b>       | LB-ID L074[pOPS0578], Kan <sup>r</sup> /Nm <sup>r</sup> , Nit <sup>r</sup>    | This work |
| <b>[pOPS0578]</b> |                                                                               |           |
| <b>L079</b>       | LB-ID L079[pOPS0579], Kan <sup>r</sup> /Nm <sup>r</sup> , Nit <sup>r</sup>    | This work |
| <b>[pOPS0579]</b> |                                                                               |           |
| <b>L082</b>       | LB-ID L082[pOPS0580], Kan <sup>r</sup> /Nm <sup>r</sup> , Nit <sup>r</sup>    | This work |
| <b>[pOPS0580]</b> |                                                                               |           |
| <b>L102</b>       | LB-ID L102[pOPS0527], Kan <sup>r</sup> /Nm <sup>r</sup> , Nit <sup>r</sup>    | This work |
| <b>[pOPS0527]</b> |                                                                               |           |
| <b>L104</b>       | LB-ID L104[pOPS0528], Kan <sup>r</sup> /Nm <sup>r</sup> , Nit <sup>r</sup>    | This work |
| <b>[pOPS0528]</b> |                                                                               |           |
| <b>LegTech</b>    | LB-ID LegTech[pOPS0518], Kan <sup>r</sup> /Nm <sup>r</sup> , Nit <sup>r</sup> | This work |
| <b>[pOPS0518]</b> |                                                                               |           |
| <b>PB3-3</b>      | LB-ID PB3-3[pOPS0541], Kan <sup>r</sup> /Nm <sup>r</sup> , Nit <sup>r</sup>   | This work |
| <b>[pOPS0541]</b> |                                                                               |           |
| <b>PB6-3B</b>     | LB-ID PB6-3B[pOPS0506], Kan <sup>r</sup> /Nm <sup>r</sup> , Nit <sup>r</sup>  | This work |
| <b>[pOPS0506]</b> |                                                                               |           |
| <b>PeanNW</b>     | LB-ID PeanNW[pOPS0544], Kan <sup>r</sup> /Nm <sup>r</sup> , Nit <sup>r</sup>  | This work |
| <b>[pOPS0544]</b> |                                                                               |           |
| <b>Rlv3841</b>    | LB-ID Rlv3841[pOPS0492], Kan <sup>r</sup> /Nm <sup>r</sup> , Nit <sup>r</sup> | This work |
| <b>[pOPS0492]</b> |                                                                               |           |
| <b>SU303</b>      | LB-ID SU303[pOPS0517], Kan <sup>r</sup> /Nm <sup>r</sup> , Nit <sup>r</sup>   | This work |
| <b>[pOPS0517]</b> |                                                                               |           |
| <b>UPM791</b>     | LB-ID UPM791[pOPS0491], Kan <sup>r</sup> /Nm <sup>r</sup> , Str <sup>r</sup>  | This work |
| <b>[pOPS0491]</b> |                                                                               |           |
| <b>V002</b>       | LB-ID V002[pOPS0513], Kan <sup>r</sup> /Nm <sup>r</sup> , Nit <sup>r</sup>    | This work |
| <b>[pOPS0513]</b> |                                                                               |           |
| <b>V004</b>       | LB-ID V004[pOPS0525], Kan <sup>r</sup> /Nm <sup>r</sup> , Nit <sup>r</sup>    | This work |
| <b>[pOPS0525]</b> |                                                                               |           |
| <b>V006</b>       | LB-ID V006[pOPS0533], Kan <sup>r</sup> /Nm <sup>r</sup> , Nit <sup>r</sup>    | This work |
| <b>[pOPS0533]</b> |                                                                               |           |
| <b>V008</b>       | LB-ID V008[pOPS0537], Kan <sup>r</sup> /Nm <sup>r</sup> , Nit <sup>r</sup>    | This work |
| <b>[pOPS0537]</b> |                                                                               |           |
| <b>V010</b>       | LB-ID V010[pOPS0549], Kan <sup>r</sup> /Nm <sup>r</sup> , Nit <sup>r</sup>    | This work |
| <b>[pOPS0549]</b> |                                                                               |           |
| <b>V014</b>       | LB-ID V014[pOPS0500], Kan <sup>r</sup> /Nm <sup>r</sup> , Nit <sup>r</sup>    | This work |
| <b>[pOPS0500]</b> |                                                                               |           |
| <b>V030</b>       | LB-ID V030[pOPS0561], Kan <sup>r</sup> /Nm <sup>r</sup> , Nit <sup>r</sup>    | This work |
| <b>[pOPS0561]</b> |                                                                               |           |
| <b>V050</b>       | LB-ID V050[pOPS0573], Kan <sup>r</sup> /Nm <sup>r</sup> , Nit <sup>r</sup>    | This work |
| <b>[pOPS0573]</b> |                                                                               |           |
| <b>V057</b>       | LB-ID V057[pOPS0585], Kan <sup>r</sup> /Nm <sup>r</sup> , Nit <sup>r</sup>    | This work |
| <b>[pOPS0585]</b> |                                                                               |           |
| <b>V060</b>       | LB-ID V060[pOPS0499], Kan <sup>r</sup> /Nm <sup>r</sup> , Nit <sup>r</sup>    | This work |
| <b>[pOPS0499]</b> |                                                                               |           |
| <b>V067</b>       | LB-ID V067[pOPS0523], Kan <sup>r</sup> /Nm <sup>r</sup> , Nit <sup>r</sup>    | This work |
| <b>[pOPS0523]</b> |                                                                               |           |
| <b>V068</b>       | LB-ID V068[pOPS0511], Kan <sup>r</sup> /Nm <sup>r</sup> , Nit <sup>r</sup>    | This work |
| <b>[pOPS0511]</b> |                                                                               |           |
| <b>V069</b>       | LB-ID V069[pOPS0535], Kan <sup>r</sup> /Nm <sup>r</sup> , Nit <sup>r</sup>    | This work |
| <b>[pOPS0535]</b> |                                                                               |           |
| <b>V074</b>       | LB-ID V074[pOPS0547], Kan <sup>r</sup> /Nm <sup>r</sup> , Nit <sup>r</sup>    | This work |
| <b>[pOPS0547]</b> |                                                                               |           |
| <b>V100</b>       | LB-ID V100[pOPS0559], Kan <sup>r</sup> /Nm <sup>r</sup> , Nit <sup>r</sup>    | This work |
| <b>[pOPS0559]</b> |                                                                               |           |

|                       |                                                                               |           |
|-----------------------|-------------------------------------------------------------------------------|-----------|
| V116<br>[pOPS0531]    | LB-ID V116[pOPS0531], Kan <sup>r</sup> /Nm <sup>r</sup> , Nit <sup>r</sup>    | This work |
| VF2<br>[pOPS0507]     | LB-ID VF2[pOPS0507], Kan <sup>r</sup> /Nm <sup>r</sup> , Nit <sup>r</sup>     | This work |
| VF5<br>[pOPS0516]     | LB-ID VF5[pOPS0516], Kan <sup>r</sup> /Nm <sup>r</sup> , Nit <sup>r</sup>     | This work |
| VSX1<br>[pOPS0502]    | LB-ID VSX1[pOPS0502], Kan <sup>r</sup> /Nm <sup>r</sup> , Nit <sup>r</sup>    | This work |
| VSX10<br>[pOPS0526]   | LB-ID VSX10[pOPS0526], Kan <sup>r</sup> /Nm <sup>r</sup> , Nit <sup>r</sup>   | This work |
| VSX11<br>[pOPS0538]   | LB-ID VSX11[pOPS0538], Kan <sup>r</sup> /Nm <sup>r</sup> , Nit <sup>r</sup>   | This work |
| VSX16<br>[pOPS0550]   | LB-ID VSX16[pOPS0550], Kan <sup>r</sup> /Nm <sup>r</sup> , Nit <sup>r</sup>   | This work |
| VSX28<br>[pOPS0574]   | LB-ID VSX28[pOPS0574], Kan <sup>r</sup> /Nm <sup>r</sup> , Nit <sup>r</sup>   | This work |
| VSX32<br>[pOPS0586]   | LB-ID VSX32[pOPS0586], Kan <sup>r</sup> /Nm <sup>r</sup> , Nit <sup>r</sup>   | This work |
| VSX7<br>[pOPS0514]    | LB-ID VSX7[pOPS0514], Kan <sup>r</sup> /Nm <sup>r</sup> , Nit <sup>r</sup>    | This work |
| WSM1475<br>[pOPS0493] | LB-ID WSM1475[pOPS0493], Kan <sup>r</sup> /Nm <sup>r</sup> , Nit <sup>r</sup> | This work |
| WSM1481<br>[pOPS0494] | LB-ID WSM1481[pOPS0494], Kan <sup>r</sup> /Nm <sup>r</sup> , Nit <sup>r</sup> | This work |
| WSM1488<br>[pOPS0496] | LB-ID WSM1488[pOPS0496], Kan <sup>r</sup> /Nm <sup>r</sup> , Nit <sup>r</sup> | This work |

| Plasmid |                                                                                                                                                          | Source     | Addgene ID |
|---------|----------------------------------------------------------------------------------------------------------------------------------------------------------|------------|------------|
| EC15071 | pL0M-SC-mCherry. Level 0 SC module cloned in pMS, Sp <sup>r</sup>                                                                                        | ENSA       |            |
| pOGG003 | pL0M-T-pharma. Level 0 T module cloned in pMS, Sp <sup>r</sup>                                                                                           | Invitrogen |            |
| pOGG004 | pLVC-P1-Lv1 (Golden Gate Level 1 cloning site with cloned <i>lacZ</i> ) position 1 module for vector construction cloned in pMS, Sp <sup>r</sup>         | (27)       | 113979     |
| pOGG008 | pLVC-P2-neo, neomycin-resistance gene, position 2 module for vector construction cloned in pMS, Sp <sup>r</sup> , Nm <sup>r</sup> /Kan <sup>r</sup>      | (27)       | 113982     |
| pOGG010 | pLVC-P3-RK2, RK2 origin of replication and <i>oriT</i> from <i>E. coli</i> , position 3 module for vector construction cloned in pMS, Sp <sup>r</sup>    | (27)       | 113984     |
| pOGG012 | pLVC-P4-par, partition genes ( <i>parABCDE</i> from pMS) for plasmid stability, position 4 module for vector construction cloned in pMS, Sp <sup>r</sup> | (27)       | 113986     |
| pOGG014 | pLVC-ELT-4, connecting position 4 to position 1 to circularise vector, endlinker module for vector construction cloned in pMS, Sp <sup>r</sup>           | (27)       | 113988     |
| pOGG026 | pL1V-Lv1-neo-RK2-par-ELT4, 6.6 kb, low copy, environmentally-stable, broad-host range Level 1 cloning vector, Nm <sup>r</sup> /Kan <sup>r</sup>          | (27)       | 113992     |
| pOGG037 | pL0M-SC-sfGFP, pMS Level 0 SC module cloned in pMS, Sp <sup>r</sup>                                                                                      | (27)       | 113995     |
| pOGG043 | pL0M-PU-psNifH. Synthetic consensus promoter to drive nodule-specific expression in biovars and strains of <i>R.</i>                                     | This work  | 133123     |

|                 |                                                                                                                                                                                                                                                                             |           |        |
|-----------------|-----------------------------------------------------------------------------------------------------------------------------------------------------------------------------------------------------------------------------------------------------------------------------|-----------|--------|
|                 | <i>leguminosarum</i> . Level 0 PU module synthesised as a fragment, Sp <sup>r</sup>                                                                                                                                                                                         |           |        |
| <b>pOGG050</b>  | pL0M-SC- <i>celB</i> . Level 0 SC module cloned in pMS, Sp <sup>r</sup> , Spc <sup>r</sup>                                                                                                                                                                                  | (27)      | 113999 |
| <b>pOGG054</b>  | Destination vector for pL1V-F2, Amp <sup>r</sup>                                                                                                                                                                                                                            | (28)      |        |
| <b>pOGG068</b>  | Destination vector for pL0V-PU, Sp <sup>r</sup>                                                                                                                                                                                                                             | (28)      |        |
| <b>pOGG072</b>  | Destination vector for pL0V-SC, Sp <sup>r</sup>                                                                                                                                                                                                                             | (28)      |        |
| <b>pOGG082</b>  | pL0M-PU-pNifH, promoter 714 bp upstream of the ATG of <i>nifH</i> for nodule-specific gene expression in <i>R. leguminosarum</i> . Made by PCR using <i>oxp0474</i> and <i>oxp0475</i> primers and cloned in destination vector pOGG068, Sp <sup>r</sup> , Spc <sup>r</sup> | (27)      | 114000 |
| <b>pOGG083</b>  | pL0M-SC- <i>gusA</i> , <i>gusA</i> from pJP2. Made by PCR using <i>oxp0376</i> and <i>oxp0377</i> primers and cloned in destination vector pOGG072, Sp <sup>r</sup> , Spc <sup>r</sup>                                                                                      | (27)      | 114001 |
| <b>pOPS0253</b> | Reporter plasmid for <i>R. leguminosarum</i> constructed with Rlv3841pNifH (pOGG082), <i>gusA</i> (pOGG083) and T-pharma (pOGG003) assembled in pOGG026, Nm <sup>r</sup> /Kan <sup>r</sup>                                                                                  | (27)      | 115505 |
| <b>pOPS0254</b> | Reporter plasmid for <i>R. leguminosarum</i> constructed with Rlv3841pNifH (pOGG082), <i>celB</i> (pOGG050) and T-pharma (pOGG003) assembled in pOGG026, Nm <sup>r</sup> /Kan <sup>r</sup>                                                                                  | (27)      | 115506 |
| <b>pOPS0262</b> | Reporter plasmid for <i>R. leguminosarum</i> constructed with psNifH (pOGG043), <i>celB</i> (pOGG050) and T-pharma (pOGG003) assembled in pOGG026, Nm <sup>r</sup> /Kan <sup>r</sup>                                                                                        | This work | 133227 |
| <b>pOPS0263</b> | Reporter plasmid for <i>R. leguminosarum</i> constructed with psNifH (pOGG043), <i>gusA</i> (pOGG083) and T-pharma (pOGG003) assembled in pOGG026, Nm <sup>r</sup> /Kan <sup>r</sup>                                                                                        | This work | 133228 |
| <b>pOPS0314</b> | Reporter plasmid for <i>R. leguminosarum</i> constructed with constitutive promoter pNeo (pOGG001), <i>celB</i> (pOGG050) and T-pharma (pOGG003) assembled in pOGG026, Nm <sup>r</sup> /Kan <sup>r</sup>                                                                    | (27)      | 115507 |
| <b>pOPS0377</b> | Reporter plasmid for <i>R. leguminosarum</i> constructed with constitutive promoter pNeo (pOGG001), sfGFP (pOGG037) and T-pharma (pOGG003) assembled in pOGG026, Nm <sup>r</sup> /Kan <sup>r</sup>                                                                          | (27)      | 115509 |
| <b>pOPS0378</b> | Reporter plasmid for <i>R. leguminosarum</i> constructed with constitutive promoter pNeo (pOGG001), mCherry (EC15071) and T-pharma (pOGG003) assembled in pOGG026, Nm <sup>r</sup> /Kan <sup>r</sup>                                                                        | This work | 133229 |
| <b>pOPS0379</b> | Reporter plasmid for <i>R. leguminosarum</i> constructed with constitutive promoter Rlv3841pNifH (pOGG082), sfGFP (pOGG037) and T-pharma (pOGG003) assembled in pOGG026, Nm <sup>r</sup> /Kan <sup>r</sup>                                                                  | (27)      | 115510 |
| <b>pOPS0380</b> | Reporter plasmid for <i>R. leguminosarum</i> constructed with constitutive promoter Rlv3841pnifH (pOGG082), mCherry (EC15071) and T-pharma (pOGG003) assembled in pOGG026, Nm <sup>r</sup> /Kan <sup>r</sup>                                                                | This work | 133230 |
| <b>pOPS0381</b> | Reporter plasmid for <i>R. leguminosarum</i> constructed with constitutive promoter psNifH (pOGG043), sfGFP (pOGG037) and T-pharma (pOGG003) assembled in pOGG026, Nm <sup>r</sup> /Kan <sup>r</sup>                                                                        | This work | 133231 |
| <b>pOPS0382</b> | Reporter plasmid for <i>R. leguminosarum</i> constructed with constitutive promoter psNifH (pOGG043), mCherry (EC15071) and T-pharma (pOGG003) assembled in pOGG026, Nm <sup>r</sup> /Kan <sup>r</sup>                                                                      | This work | 133232 |

|                 |                                                                                                                                                                                                 |           |        |
|-----------------|-------------------------------------------------------------------------------------------------------------------------------------------------------------------------------------------------|-----------|--------|
| <b>pOPS0383</b> | Reporter plasmid for <i>R. leguminosarum</i> constructed with NoP (pOGG113), sfGFP (pOGG037) and T-pharma (pOGG003) assembled in pOGG026, Nm <sup>r</sup> /Kan <sup>r</sup>                     | This work | 133233 |
| <b>pOPS0384</b> | Reporter plasmid for <i>R. leguminosarum</i> constructed with NoP (pOGG113), mCherry (EC15071) and T-pharma (pOGG003) assembled in pOGG026, Nm <sup>r</sup> /Kan <sup>r</sup>                   | This work | 133234 |
| <b>pOPS0385</b> | Reporter plasmid for <i>R. leguminosarum</i> constructed with NoP (pOGG113), <i>gusA</i> (pOGG083) and T-pharma (pOGG003) assembled in pOGG026, Nm <sup>r</sup> /Kan <sup>r</sup>               | This work | 133235 |
| <b>pOPS0386</b> | Reporter plasmid for <i>R. leguminosarum</i> constructed with NoP (pOGG113), <i>celB</i> (pOGG050) and T-pharma (pOGG003) assembled in pOGG026, Nm <sup>r</sup> /Kan <sup>r</sup>               | This work | 133236 |
| <b>pOPS0491</b> | psNifH-sfGFP-A1 in pOGG026 Plasmid constructed by GG with universal primer binding site. Confirmed BC sequence: TCCCTTGTCTCC Golay reference name:806rcbc0. Nm <sup>r</sup> /Kan <sup>r</sup>   | This work | 133132 |
| <b>pOPS0492</b> | psNifH-sfGFP-A2 in pOGG026 Plasmid constructed by GG with universal primer binding site. Confirmed BC sequence: ACGAGACTGATT Golay reference name:806rcbc1. Nm <sup>r</sup> /Kan <sup>r</sup>   | This work | 133133 |
| <b>pOPS0493</b> | psNifH-sfGFP-A3 in pOGG026 Plasmid constructed by GG with universal primer binding site. Confirmed BC sequence: GCTGTACGGATT Golay reference name:806rcbc2. Nm <sup>r</sup> /Kan <sup>r</sup>   | This work | 133134 |
| <b>pOPS0494</b> | psNifH-sfGFP-A4 in pOGG026 Plasmid constructed by GG with universal primer binding site. Confirmed BC sequence: ATCACCAGGTGT Golay reference name:806rcbc3. Nm <sup>r</sup> /Kan <sup>r</sup>   | This work | 133135 |
| <b>pOPS0495</b> | psNifH-sfGFP-A5 in pOGG026 Plasmid constructed by GG with universal primer binding site. Confirmed BC sequence: TGGTCAACGATA Golay reference name:806rcbc4. Nm <sup>r</sup> /Kan <sup>r</sup>   | This work | 133136 |
| <b>pOPS0496</b> | psNifH-sfGFP-A6 in pOGG026 Plasmid constructed by GG with universal primer binding site. Confirmed BC sequence: ATCGCACAGTAA Golay reference name:806rcbc5. Nm <sup>r</sup> /Kan <sup>r</sup>   | This work | 133137 |
| <b>pOPS0497</b> | psNifH-sfGFP-A7 in pOGG026 Plasmid constructed by GG with universal primer binding site. Confirmed BC sequence: GTCGTGTAGCCT Golay reference name:806rcbc6. Nm <sup>r</sup> /Kan <sup>r</sup>   | This work | 133138 |
| <b>pOPS0498</b> | psNifH-sfGFP-A8 in pOGG026 Plasmid constructed by GG with universal primer binding site. Confirmed BC sequence: AGCGGAGGTTAG Golay reference name:806rcbc7. Nm <sup>r</sup> /Kan <sup>r</sup>   | This work | 133139 |
| <b>pOPS0499</b> | psNifH-sfGFP-A9 in pOGG026 Plasmid constructed by GG with universal primer binding site. Confirmed BC sequence: ATCCTTTGGTTC Golay reference name:806rcbc8. Nm <sup>r</sup> /Kan <sup>r</sup>   | This work | 133140 |
| <b>pOPS0500</b> | psNifH-sfGFP-A10 in pOGG026 Plasmid constructed by GG with universal primer binding site. Confirmed BC sequence: TACAGCGCATAC Golay reference name:806rcbc9. Nm <sup>r</sup> /Kan <sup>r</sup>  | This work | 133141 |
| <b>pOPS0501</b> | psNifH-sfGFP-A11 in pOGG026 Plasmid constructed by GG with universal primer binding site. Confirmed BC sequence: ACCGGTATGTAC Golay reference name:806rcbc10. Nm <sup>r</sup> /Kan <sup>r</sup> | This work | 133142 |



|                 |                                                                                                                                                                                                 |           |        |
|-----------------|-------------------------------------------------------------------------------------------------------------------------------------------------------------------------------------------------|-----------|--------|
| <b>pOPS0502</b> | psNifH-sfGFP-A12 in pOGG026 Plasmid constructed by GG with universal primer binding site. Confirmed BC sequence: AATTGTGTCGGA Golay reference name:806rcbc11. Nm <sup>r</sup> /Kan <sup>r</sup> | This work | 133143 |
| <b>pOPS0503</b> | psNifH-sfGFP-B1 in pOGG026 Plasmid constructed by GG with universal primer binding site. Confirmed BC sequence: TGCATACACTGG Golay reference name:806rcbc12. Nm <sup>r</sup> /Kan <sup>r</sup>  | This work | 133144 |
| <b>pOPS0504</b> | psNifH-sfGFP-B2 in pOGG026 Plasmid constructed by GG with universal primer binding site. Confirmed BC sequence: AGTCGAACGAGG Golay reference name:806rcbc13. Nm <sup>r</sup> /Kan <sup>r</sup>  | This work | 133145 |
| <b>pOPS0505</b> | psNifH-sfGFP-B3 in pOGG026 Plasmid constructed by GG with universal primer binding site. Confirmed BC sequence: ACCAGTGACTCA Golay reference name:806rcbc14. Nm <sup>r</sup> /Kan <sup>r</sup>  | This work | 133146 |
| <b>pOPS0506</b> | psNifH-sfGFP-B4 in pOGG026 Plasmid constructed by GG with universal primer binding site. Confirmed BC sequence: GAATACCAAGTC Golay reference name:806rcbc15. Nm <sup>r</sup> /Kan <sup>r</sup>  | This work | 133147 |
| <b>pOPS0507</b> | psNifH-sfGFP-B5 in pOGG026 Plasmid constructed by GG with universal primer binding site. Confirmed BC sequence: GTAGATCGTGTA Golay reference name:806rcbc16. Nm <sup>r</sup> /Kan <sup>r</sup>  | This work | 133148 |
| <b>pOPS0508</b> | psNifH-sfGFP-B6 in pOGG026 Plasmid constructed by GG with universal primer binding site. Confirmed BC sequence: TAACGTGTGTGC Golay reference name:806rcbc17. Nm <sup>r</sup> /Kan <sup>r</sup>  | This work | 133149 |
| <b>pOPS0509</b> | psNifH-sfGFP-B7 in pOGG026 Plasmid constructed by GG with universal primer binding site. Confirmed BC sequence: CATTATGGCGTG Golay reference name:806rcbc18. Nm <sup>r</sup> /Kan <sup>r</sup>  | This work | 133150 |
| <b>pOPS0510</b> | psNifH-sfGFP-B8 in pOGG026 Plasmid constructed by GG with universal primer binding site. Confirmed BC sequence: CCAATACGCCTG Golay reference name:806rcbc19. Nm <sup>r</sup> /Kan <sup>r</sup>  | This work | 133151 |
| <b>pOPS0511</b> | psNifH-sfGFP-B9 in pOGG026 Plasmid constructed by GG with universal primer binding site. Confirmed BC sequence: GATCTGCGATCC Golay reference name:806rcbc20. Nm <sup>r</sup> /Kan <sup>r</sup>  | This work | 133152 |
| <b>pOPS0512</b> | psNifH-sfGFP-B10 in pOGG026 Plasmid constructed by GG with universal primer binding site. Confirmed BC sequence: CAGCTCATCAGC Golay reference name:806rcbc21. Nm <sup>r</sup> /Kan <sup>r</sup> | This work | 133153 |
| <b>pOPS0513</b> | psNifH-sfGFP-B11 in pOGG026 Plasmid constructed by GG with universal primer binding site. Confirmed BC sequence: CAAACAACAGCT Golay reference name:806rcbc22. Nm <sup>r</sup> /Kan <sup>r</sup> | This work | 133154 |
| <b>pOPS0514</b> | psNifH-sfGFP-B12 in pOGG026 Plasmid constructed by GG with universal primer binding site. Confirmed BC sequence: GCAACACCATCC Golay reference name:806rcbc23. Nm <sup>r</sup> /Kan <sup>r</sup> | This work | 133155 |
| <b>pOPS0515</b> | psNifH-sfGFP-C1 in pOGG026 Plasmid constructed by GG with universal primer binding site. Confirmed BC sequence: GCGATATATCGC Golay reference name:806rcbc24. Nm <sup>r</sup> /Kan <sup>r</sup>  | This work | 133156 |

|                 |                                                                                                                                                                                                 |           |        |
|-----------------|-------------------------------------------------------------------------------------------------------------------------------------------------------------------------------------------------|-----------|--------|
| <b>pOPS0516</b> | psNifH-sfGFP-C2 in pOGG026 Plasmid constructed by GG with universal primer binding site. Confirmed BC sequence: CGAGCAATCCTA Golay reference name:806rcbc25. Nm <sup>r</sup> /Kan <sup>r</sup>  | This work | 133157 |
| <b>pOPS0517</b> | psNifH-sfGFP-C3 in pOGG026 Plasmid constructed by GG with universal primer binding site. Confirmed BC sequence: AGTCGTGCACAT Golay reference name:806rcbc26. Nm <sup>r</sup> /Kan <sup>r</sup>  | This work | 133158 |
| <b>pOPS0518</b> | psNifH-sfGFP-C4 in pOGG026 Plasmid constructed by GG with universal primer binding site. Confirmed BC sequence: GTATCTGCGCGT Golay reference name:806rcbc27. Nm <sup>r</sup> /Kan <sup>r</sup>  | This work | 133159 |
| <b>pOPS0519</b> | psNifH-sfGFP-C5 in pOGG026 Plasmid constructed by GG with universal primer binding site. Confirmed BC sequence: CGAGGGAAAGTC Golay reference name:806rcbc28. Nm <sup>r</sup> /Kan <sup>r</sup>  | This work | 133160 |
| <b>pOPS0520</b> | psNifH-sfGFP-C6 in pOGG026 Plasmid constructed by GG with universal primer binding site. Confirmed BC sequence: CAAATTCGGGAT Golay reference name:806rcbc29. Nm <sup>r</sup> /Kan <sup>r</sup>  | This work | 133161 |
| <b>pOPS0521</b> | psNifH-sfGFP-C7 in pOGG026 Plasmid constructed by GG with universal primer binding site. Confirmed BC sequence: AGATTGACCAAC Golay reference name:806rcbc30. Nm <sup>r</sup> /Kan <sup>r</sup>  | This work | 133162 |
| <b>pOPS0522</b> | psNifH-sfGFP-C8 in pOGG026 Plasmid constructed by GG with universal primer binding site. Confirmed BC sequence: AGTTACGAGCTA Golay reference name:806rcbc31. Nm <sup>r</sup> /Kan <sup>r</sup>  | This work | 133163 |
| <b>pOPS0523</b> | psNifH-sfGFP-C9 in pOGG026 Plasmid constructed by GG with universal primer binding site. Confirmed BC sequence: GCATATGCACTG Golay reference name:806rcbc32. Nm <sup>r</sup> /Kan <sup>r</sup>  | This work | 133164 |
| <b>pOPS0524</b> | psNifH-sfGFP-C10 in pOGG026 Plasmid constructed by GG with universal primer binding site. Confirmed BC sequence: CAACTCCCGTGA Golay reference name:806rcbc33. Nm <sup>r</sup> /Kan <sup>r</sup> | This work | 133165 |
| <b>pOPS0525</b> | psNifH-sfGFP-C11 in pOGG026 Plasmid constructed by GG with universal primer binding site. Confirmed BC sequence: TTGCGTTAGCAG Golay reference name:806rcbc34. Nm <sup>r</sup> /Kan <sup>r</sup> | This work | 133166 |
| <b>pOPS0526</b> | psNifH-sfGFP-C12 in pOGG026 Plasmid constructed by GG with universal primer binding site. Confirmed BC sequence: TACGAGCCCTAA Golay reference name:806rcbc35. Nm <sup>r</sup> /Kan <sup>r</sup> | This work | 133167 |
| <b>pOPS0527</b> | psNifH-sfGFP-D1 in pOGG026 Plasmid constructed by GG with universal primer binding site. Confirmed BC sequence: CACTACGCTAGA Golay reference name:806rcbc36. Nm <sup>r</sup> /Kan <sup>r</sup>  | This work | 133168 |
| <b>pOPS0528</b> | psNifH-sfGFP-D2 in pOGG026 Plasmid constructed by GG with universal primer binding site. Confirmed BC sequence: TGCAGTCCTCGA Golay reference name:806rcbc37. Nm <sup>r</sup> /Kan <sup>r</sup>  | This work | 133169 |
| <b>pOPS0529</b> | psNifH-sfGFP-D3 in pOGG026 Plasmid constructed by GG with universal primer binding site. Confirmed BC sequence: ACCATAGCTCCG Golay reference name:806rcbc38. Nm <sup>r</sup> /Kan <sup>r</sup>  | This work | 133170 |

|                 |                                                                                                                                                                                                 |           |        |
|-----------------|-------------------------------------------------------------------------------------------------------------------------------------------------------------------------------------------------|-----------|--------|
| <b>pOPS0530</b> | psNifH-sfGFP-D4 in pOGG026 Plasmid constructed by GG with universal primer binding site. Confirmed BC sequence: TCGACATCTCTT Golay reference name:806rcbc39. Nm <sup>r</sup> /Kan <sup>r</sup>  | This work | 133171 |
| <b>pOPS0531</b> | psNifH-sfGFP-D5 in pOGG026 Plasmid constructed by GG with universal primer binding site. Confirmed BC sequence: GAACACTTTGGA Golay reference name:806rcbc40. Nm <sup>r</sup> /Kan <sup>r</sup>  | This work | 133172 |
| <b>pOPS0532</b> | psNifH-sfGFP-D6 in pOGG026 Plasmid constructed by GG with universal primer binding site. Confirmed BC sequence: GAGCCATCTGTA Golay reference name:806rcbc41. Nm <sup>r</sup> /Kan <sup>r</sup>  | This work | 133173 |
| <b>pOPS0533</b> | psNifH-sfGFP-D7 in pOGG026 Plasmid constructed by GG with universal primer binding site. Confirmed BC sequence: TTGGGTACACGT Golay reference name:806rcbc42. Nm <sup>r</sup> /Kan <sup>r</sup>  | This work | 133174 |
| <b>pOPS0534</b> | psNifH-sfGFP-D8 in pOGG026 Plasmid constructed by GG with universal primer binding site. Confirmed BC sequence: AAGGCGCTCCTT Golay reference name:806rcbc43. Nm <sup>r</sup> /Kan <sup>r</sup>  | This work | 133175 |
| <b>pOPS0535</b> | psNifH-sfGFP-D9 in pOGG026 Plasmid constructed by GG with universal primer binding site. Confirmed BC sequence: TAATACGGATCG Golay reference name:806rcbc44. Nm <sup>r</sup> /Kan <sup>r</sup>  | This work | 133176 |
| <b>pOPS0536</b> | psNifH-sfGFP-D10 in pOGG026 Plasmid constructed by GG with universal primer binding site. Confirmed BC sequence: TCGGAATTAGAC Golay reference name:806rcbc45. Nm <sup>r</sup> /Kan <sup>r</sup> | This work | 133177 |
| <b>pOPS0537</b> | psNifH-sfGFP-D11 in pOGG026 Plasmid constructed by GG with universal primer binding site. Confirmed BC sequence: TGTGAATTCGGA Golay reference name:806rcbc46. Nm <sup>r</sup> /Kan <sup>r</sup> | This work | 133178 |
| <b>pOPS0538</b> | psNifH-sfGFP-D12 in pOGG026 Plasmid constructed by GG with universal primer binding site. Confirmed BC sequence: CATTCTGGCGT Golay reference name:806rcbc47. Nm <sup>r</sup> /Kan <sup>r</sup>  | This work | 133179 |
| <b>pOPS0539</b> | psNifH-sfGFP-E1 in pOGG026 Plasmid constructed by GG with universal primer binding site. Confirmed BC sequence: TACTACGTGGCC Golay reference name:806rcbc48. Nm <sup>r</sup> /Kan <sup>r</sup>  | This work | 133180 |
| <b>pOPS0540</b> | psNifH-sfGFP-E2 in pOGG026 Plasmid constructed by GG with universal primer binding site. Confirmed BC sequence: GGCCAGTTCCTA Golay reference name:806rcbc49. Nm <sup>r</sup> /Kan <sup>r</sup>  | This work | 133181 |
| <b>pOPS0541</b> | psNifH-sfGFP-E3 in pOGG026 Plasmid constructed by GG with universal primer binding site. Confirmed BC sequence: GATGTTCGCTAG Golay reference name:806rcbc50. Nm <sup>r</sup> /Kan <sup>r</sup>  | This work | 133182 |
| <b>pOPS0542</b> | psNifH-sfGFP-E4 in pOGG026 Plasmid constructed by GG with universal primer binding site. Confirmed BC sequence: CTATCTCCTGTC Golay reference name:806rcbc51. Nm <sup>r</sup> /Kan <sup>r</sup>  | This work | 133183 |
| <b>pOPS0543</b> | psNifH-sfGFP-E5 in pOGG026 Plasmid constructed by GG with universal primer binding site. Confirmed BC sequence: ACTCACAGGAAT Golay reference name:806rcbc52. Nm <sup>r</sup> /Kan <sup>r</sup>  | This work | 133184 |

|                 |                                                                                                                                                                                                 |           |        |
|-----------------|-------------------------------------------------------------------------------------------------------------------------------------------------------------------------------------------------|-----------|--------|
| <b>pOPS0544</b> | psNifH-sfGFP-E6 in pOGG026 Plasmid constructed by GG with universal primer binding site. Confirmed BC sequence: ATGATGAGCCTC Golay reference name:806rcbc53. Nm <sup>r</sup> /Kan <sup>r</sup>  | This work | 133185 |
| <b>pOPS0545</b> | psNifH-sfGFP-E7 in pOGG026 Plasmid constructed by GG with universal primer binding site. Confirmed BC sequence: GTCGACAGAGGA Golay reference name:806rcbc54. Nm <sup>r</sup> /Kan <sup>r</sup>  | This work | 133186 |
| <b>pOPS0546</b> | psNifH-sfGFP-E8 in pOGG026 Plasmid constructed by GG with universal primer binding site. Confirmed BC sequence: TGTCGCAAATAG Golay reference name:806rcbc55. Nm <sup>r</sup> /Kan <sup>r</sup>  | This work | 133187 |
| <b>pOPS0547</b> | psNifH-sfGFP-E9 in pOGG026 Plasmid constructed by GG with universal primer binding site. Confirmed BC sequence: CATCCCTCTACT Golay reference name:806rcbc56. Nm <sup>r</sup> /Kan <sup>r</sup>  | This work | 133188 |
| <b>pOPS0548</b> | psNifH-sfGFP-E10 in pOGG026 Plasmid constructed by GG with universal primer binding site. Confirmed BC sequence: TATACCGCTGCG Golay reference name:806rcbc57. Nm <sup>r</sup> /Kan <sup>r</sup> | This work | 133189 |
| <b>pOPS0549</b> | psNifH-sfGFP-E11 in pOGG026 Plasmid constructed by GG with universal primer binding site. Confirmed BC sequence: AGTTGAGGCATT Golay reference name:806rcbc58. Nm <sup>r</sup> /Kan <sup>r</sup> | This work | 133190 |
| <b>pOPS0550</b> | psNifH-sfGFP-E12 in pOGG026 Plasmid constructed by GG with universal primer binding site. Confirmed BC sequence: ACAATAGACACC Golay reference name:806rcbc59. Nm <sup>r</sup> /Kan <sup>r</sup> | This work | 133191 |
| <b>pOPS0551</b> | psNifH-sfGFP-F1 in pOGG026 Plasmid constructed by GG with universal primer binding site. Confirmed BC sequence: CGGTCAATTGAC Golay reference name:806rcbc60. Nm <sup>r</sup> /Kan <sup>r</sup>  | This work | 133192 |
| <b>pOPS0552</b> | psNifH-sfGFP-F2 in pOGG026 Plasmid constructed by GG with universal primer binding site. Confirmed BC sequence: TGGAGTAGGTGG Golay reference name:806rcbc61. Nm <sup>r</sup> /Kan <sup>r</sup>  | This work | 133193 |
| <b>pOPS0553</b> | psNifH-sfGFP-F3 in pOGG026 Plasmid constructed by GG with universal primer binding site. Confirmed BC sequence: GCTCGAAGATTC Golay reference name:806rcbc62. Nm <sup>r</sup> /Kan <sup>r</sup>  | This work | 133194 |
| <b>pOPS0554</b> | psNifH-sfGFP-F4 in pOGG026 Plasmid constructed by GG with universal primer binding site. Confirmed BC sequence: AGGCTTACGTGT Golay reference name:806rcbc63. Nm <sup>r</sup> /Kan <sup>r</sup>  | This work | 133195 |
| <b>pOPS0555</b> | psNifH-sfGFP-F5 in pOGG026 Plasmid constructed by GG with universal primer binding site. Confirmed BC sequence: TCTCTACCACTC Golay reference name:806rcbc64. Nm <sup>r</sup> /Kan <sup>r</sup>  | This work | 133196 |
| <b>pOPS0556</b> | psNifH-sfGFP-F6 in pOGG026 Plasmid constructed by GG with universal primer binding site. Confirmed BC sequence: ACTTCCA ACTTC Golay reference name:806rcbc65. Nm <sup>r</sup> /Kan <sup>r</sup> | This work | 133197 |
| <b>pOPS0557</b> | psNifH-sfGFP-F7 in pOGG026 Plasmid constructed by GG with universal primer binding site. Confirmed BC sequence: CTCACCTAGGAA Golay reference name:806rcbc66. Nm <sup>r</sup> /Kan <sup>r</sup>  | This work | 133198 |

|                 |                                                                                                                                                                                                 |           |        |
|-----------------|-------------------------------------------------------------------------------------------------------------------------------------------------------------------------------------------------|-----------|--------|
| <b>pOPS0558</b> | psNifH-sfGFP-F8 in pOGG026 Plasmid constructed by GG with universal primer binding site. Confirmed BC sequence: GTGTTGTCGTGC Golay reference name:806rcbc67. Nm <sup>r</sup> /Kan <sup>r</sup>  | This work | 133199 |
| <b>pOPS0559</b> | psNifH-sfGFP-F9 in pOGG026 Plasmid constructed by GG with universal primer binding site. Confirmed BC sequence: CCACAGATCGAT Golay reference name:806rcbc68. Nm <sup>r</sup> /Kan <sup>r</sup>  | This work | 133200 |
| <b>pOPS0560</b> | psNifH-sfGFP-F10 in pOGG026 Plasmid constructed by GG with universal primer binding site. Confirmed BC sequence: TATCGACACAAG Golay reference name:806rcbc69. Nm <sup>r</sup> /Kan <sup>r</sup> | This work | 133201 |
| <b>pOPS0561</b> | psNifH-sfGFP-F11 in pOGG026 Plasmid constructed by GG with universal primer binding site. Confirmed BC sequence: GATTCCGGCTCA Golay reference name:806rcbc70. Nm <sup>r</sup> /Kan <sup>r</sup> | This work | 133202 |
| <b>pOPS0562</b> | psNifH-sfGFP-F12 in pOGG026 Plasmid constructed by GG with universal primer binding site. Confirmed BC sequence: CGTAATTGCCGC Golay reference name:806rcbc71. Nm <sup>r</sup> /Kan <sup>r</sup> | This work | 133203 |
| <b>pOPS0563</b> | psNifH-sfGFP-G1 in pOGG026 Plasmid constructed by GG with universal primer binding site. Confirmed BC sequence: GGTGACTAGTTC Golay reference name:806rcbc72. Nm <sup>r</sup> /Kan <sup>r</sup>  | This work | 133204 |
| <b>pOPS0564</b> | psNifH-sfGFP-G2 in pOGG026 Plasmid constructed by GG with universal primer binding site. Confirmed BC sequence: GTGGAGTCTCAT Golay reference name:806rcbc73. Nm <sup>r</sup> /Kan <sup>r</sup>  | This work | 133205 |
| <b>pOPS0565</b> | psNifH-sfGFP-G3 in pOGG026 Plasmid constructed by GG with universal primer binding site. Confirmed BC sequence: TAGGCATGCTTG Golay reference name:806rcbc74. Nm <sup>r</sup> /Kan <sup>r</sup>  | This work | 133206 |
| <b>pOPS0566</b> | psNifH-sfGFP-G4 in pOGG026 Plasmid constructed by GG with universal primer binding site. Confirmed BC sequence: AACTAGTTCAGG Golay reference name:806rcbc75. Nm <sup>r</sup> /Kan <sup>r</sup>  | This work | 133207 |
| <b>pOPS0567</b> | psNifH-sfGFP-G5 in pOGG026 Plasmid constructed by GG with universal primer binding site. Confirmed BC sequence: ATTCTGCCGAAG Golay reference name:806rcbc76. Nm <sup>r</sup> /Kan <sup>r</sup>  | This work | 133208 |
| <b>pOPS0568</b> | psNifH-sfGFP-G6 in pOGG026 Plasmid constructed by GG with universal primer binding site. Confirmed BC sequence: AGCATGTCCCGT Golay reference name:806rcbc77. Nm <sup>r</sup> /Kan <sup>r</sup>  | This work | 133209 |
| <b>pOPS0569</b> | psNifH-sfGFP-G7 in pOGG026 Plasmid constructed by GG with universal primer binding site. Confirmed BC sequence: GTACGATATGAC Golay reference name:806rcbc78. Nm <sup>r</sup> /Kan <sup>r</sup>  | This work | 133210 |
| <b>pOPS0570</b> | psNifH-sfGFP-G8 in pOGG026 Plasmid constructed by GG with universal primer binding site. Confirmed BC sequence: GTGGTGGTTTCC Golay reference name:806rcbc79. Nm <sup>r</sup> /Kan <sup>r</sup>  | This work | 133211 |
| <b>pOPS0571</b> | psNifH-sfGFP-G9 in pOGG026 Plasmid constructed by GG with universal primer binding site. Confirmed BC sequence: TAGTATGCGCAA Golay reference name:806rcbc80. Nm <sup>r</sup> /Kan <sup>r</sup>  | This work | 133212 |

|                 |                                                                                                                                                                                                 |           |        |
|-----------------|-------------------------------------------------------------------------------------------------------------------------------------------------------------------------------------------------|-----------|--------|
| <b>pOPS0572</b> | psNifH-sfGFP-G10 in pOGG026 Plasmid constructed by GG with universal primer binding site. Confirmed BC sequence: TGCGCTGAATGT Golay reference name:806rcbc81. Nm <sup>r</sup> /Kan <sup>r</sup> | This work | 133213 |
| <b>pOPS0573</b> | psNifH-sfGFP-G11 in pOGG026 Plasmid constructed by GG with universal primer binding site. Confirmed BC sequence: ATGGCTGTCAGT Golay reference name:806rcbc82. Nm <sup>r</sup> /Kan <sup>r</sup> | This work | 133214 |
| <b>pOPS0574</b> | psNifH-sfGFP-G12 in pOGG026 Plasmid constructed by GG with universal primer binding site. Confirmed BC sequence: GTTCTCTTCTCG Golay reference name:806rcbc83. Nm <sup>r</sup> /Kan <sup>r</sup> | This work | 133215 |
| <b>pOPS0575</b> | psNifH-sfGFP-H1 in pOGG026 Plasmid constructed by GG with universal primer binding site. Confirmed BC sequence: CGTAAGATGCCT Golay reference name:806rcbc84. Nm <sup>r</sup> /Kan <sup>r</sup>  | This work | 133216 |
| <b>pOPS0576</b> | psNifH-sfGFP-H2 in pOGG026 Plasmid constructed by GG with universal primer binding site. Confirmed BC sequence: GCGTTCTAGCTG Golay reference name:806rcbc85. Nm <sup>r</sup> /Kan <sup>r</sup>  | This work | 133217 |
| <b>pOPS0577</b> | psNifH-sfGFP-H3 in pOGG026 Plasmid constructed by GG with universal primer binding site. Confirmed BC sequence: GTTGTCTGGGA Golay reference name:806rcbc86. Nm <sup>r</sup> /Kan <sup>r</sup>   | This work | 133218 |
| <b>pOPS0578</b> | psNifH-sfGFP-H4 in pOGG026 Plasmid constructed by GG with universal primer binding site. Confirmed BC sequence: GGACTTCCAGCT Golay reference name:806rcbc87. Nm <sup>r</sup> /Kan <sup>r</sup>  | This work | 133219 |
| <b>pOPS0579</b> | psNifH-sfGFP-H5 in pOGG026 Plasmid constructed by GG with universal primer binding site. Confirmed BC sequence: CTCACAACCGTG Golay reference name:806rcbc88. Nm <sup>r</sup> /Kan <sup>r</sup>  | This work | 133220 |
| <b>pOPS0580</b> | psNifH-sfGFP-H6 in pOGG026 Plasmid constructed by GG with universal primer binding site. Confirmed BC sequence: CTGCTATTCCTC Golay reference name:806rcbc89. Nm <sup>r</sup> /Kan <sup>r</sup>  | This work | 133221 |
| <b>pOPS0581</b> | psNifH-sfGFP-H7 in pOGG026 Plasmid constructed by GG with universal primer binding site. Confirmed BC sequence: ATGTCACCGCTG Golay reference name:806rcbc90. Nm <sup>r</sup> /Kan <sup>r</sup>  | This work | 133222 |
| <b>pOPS0582</b> | psNifH-sfGFP-H8 in pOGG026 Plasmid constructed by GG with universal primer binding site. Confirmed BC sequence: TGTAACGCCGAT Golay reference name:806rcbc91. Nm <sup>r</sup> /Kan <sup>r</sup>  | This work | 133223 |
| <b>pOPS0584</b> | psNifH-sfGFP-H10 in pOGG026 Plasmid constructed by GG with universal primer binding site. Confirmed BC sequence: ATGGTTCCGTC Golay reference name:806rcbc93. Nm <sup>r</sup> /Kan <sup>r</sup>  | This work | 133224 |
| <b>pOPS0585</b> | psNifH-sfGFP-H11 in pOGG026 Plasmid constructed by GG with universal primer binding site. Confirmed BC sequence: TTGGCTCTATTC Golay reference name:806rcbc94. Nm <sup>r</sup> /Kan <sup>r</sup> | This work | 133225 |
| <b>pOPS0586</b> | psNifH-sfGFP-H12 in pOGG026 Plasmid constructed by GG with universal primer binding site. Confirmed BC sequence: GATCCCACGTAC Golay reference name:806rcbc95. Nm <sup>r</sup> /Kan <sup>r</sup> | This work | 133226 |

|                 |                                                                                                                                                                              |           |        |
|-----------------|------------------------------------------------------------------------------------------------------------------------------------------------------------------------------|-----------|--------|
| <b>pOSP0750</b> | Reporter Plasmid constructed with constitutive promoter pNeo (pOGG001), <i>gusA</i> (pOGG083) and T-pharma (pOGG003) assembled in pOGG026, Nm <sup>r</sup> /Kan <sup>r</sup> | This work | 133237 |
|-----------------|------------------------------------------------------------------------------------------------------------------------------------------------------------------------------|-----------|--------|

**GG, Golden Gate Cloning; BC, Barcode. Amp<sup>r</sup>, ampicillin resistance; Gm<sup>r</sup>, gentamicin resistance; Kan<sup>r</sup>, kanamycin resistance; Nm<sup>r</sup>, neomycin resistance; Nit<sup>r</sup>, nitrofurantoin resistance; Rf<sup>r</sup>, rifampicin resistance, Tet<sup>r</sup>, tetracycline resistance.**

**Table S2. Primers used in Golden Gate constructions.**

| <b>Primer</b>  | <b>Sequence (5'-3')</b>                    | <b>Description</b>                                                                   | <b>Source</b> |
|----------------|--------------------------------------------|--------------------------------------------------------------------------------------|---------------|
| <b>oxp0282</b> | CCTACCTAGATCCTCGC                          | Forward primer. Used for screening plasmid constructions in pOGG026 backbone vector  | This work     |
| <b>oxp0283</b> | AGCGTTCTGAACAAATCC                         | Reverse primer. Used for screening plasmid constructions in pOGG026 backbone vector  | This work     |
| <b>oxp1334</b> | CACTCTGTGGTCTCAGGAGCA<br>TCCTCCCTAATGCGCC  | Forward primer for amplification of promoterless region from pIJJ11268 for PU module | This work     |
| <b>oxp1335</b> | CACTTCGTGGTCTCACATTCGT<br>ATCCTCCAAGCCTGAA | Reverse primer for amplification of promoterless region from pIJJ11268 for PU module | This work     |



**Table S3. Plasmid IDs as sense and antisense oligonucleotides to be assembled as Golden Gate T modules.**

| Oligo name     | Full Sequence (5' to 3')                |
|----------------|-----------------------------------------|
| 806rcbc0       | GCTTTCCCTTGTCTCCCGTTTTACAACGTCGTGACTGGG |
| 806rcbc0_anti  | AGCGCCCAGTCACGACGTTGTAAAACGGGAGACAAGGGA |
| 806rcbc1       | GCTTACGAGACTGATTCGTTTTACAACGTCGTGACTGGG |
| 806rcbc1_anti  | AGCGCCCAGTCACGACGTTGTAAAACGAATCAGTCTCGT |
| 806rcbc2       | GCTTGCTGTACGGATTCGTTTTACAACGTCGTGACTGGG |
| 806rcbc2_anti  | AGCGCCCAGTCACGACGTTGTAAAACGAATCCGTACAGC |
| 806rcbc3       | GCTTATCACCAGGTGTCGTTTTACAACGTCGTGACTGGG |
| 806rcbc3_anti  | AGCGCCCAGTCACGACGTTGTAAAACGACACCTGGTGAT |
| 806rcbc4       | GCTTTGGTCAACGATACGTTTTACAACGTCGTGACTGGG |
| 806rcbc4_anti  | AGCGCCCAGTCACGACGTTGTAAAACGTATCGTTGACCA |
| 806rcbc5       | GCTTATCGCACAGTAACGTTTTACAACGTCGTGACTGGG |
| 806rcbc5_anti  | AGCGCCCAGTCACGACGTTGTAAAACGTTACTGTGCGAT |
| 806rcbc6       | GCTTGTCGTGTAGCCTCGTTTTACAACGTCGTGACTGGG |
| 806rcbc6_anti  | AGCGCCCAGTCACGACGTTGTAAAACGAGGCTACACGAC |
| 806rcbc7       | GCTTAGCGGAGGTTAGCGTTTTACAACGTCGTGACTGGG |
| 806rcbc7_anti  | AGCGCCCAGTCACGACGTTGTAAAACGCTAACCTCCGCT |
| 806rcbc8       | GCTTATCCTTTGGTTCGGTTTTACAACGTCGTGACTGGG |
| 806rcbc8_anti  | AGCGCCCAGTCACGACGTTGTAAAACGGAACCAAAGGAT |
| 806rcbc9       | GCTTTACAGCGCATAACGTTTTACAACGTCGTGACTGGG |
| 806rcbc9_anti  | AGCGCCCAGTCACGACGTTGTAAAACGGTATGCGCTGTA |
| 806rcbc10      | GCTTACCGGTATGTACCGTTTTACAACGTCGTGACTGGG |
| 806rcbc10_anti | AGCGCCCAGTCACGACGTTGTAAAACGGTACATACCGGT |
| 806rcbc11      | GCTTAATTGTGTCGGACGTTTTACAACGTCGTGACTGGG |
| 806rcbc11_anti | AGCGCCCAGTCACGACGTTGTAAAACGTCCGACACAATT |
| 806rcbc12      | GCTTTGCATACACTGGCGTTTTACAACGTCGTGACTGGG |
| 806rcbc12_anti | AGCGCCCAGTCACGACGTTGTAAAACGCCAGTGTATGCA |
| 806rcbc13      | GCTTAGTCGAACGAGGCGTTTTACAACGTCGTGACTGGG |
| 806rcbc13_anti | AGCGCCCAGTCACGACGTTGTAAAACGCCTCGTTGACT  |
| 806rcbc14      | GCTTACCAGTGACTCACGTTTTACAACGTCGTGACTGGG |
| 806rcbc14_anti | AGCGCCCAGTCACGACGTTGTAAAACGTGAGTCACTGGT |
| 806rcbc15      | GCTTGAATACCAAGTCCGTTTTACAACGTCGTGACTGGG |
| 806rcbc15_anti | AGCGCCCAGTCACGACGTTGTAAAACGGACTTGGTATTC |
| 806rcbc16      | GCTTGTAGATCGTGTACGTTTTACAACGTCGTGACTGGG |
| 806rcbc16_anti | AGCGCCCAGTCACGACGTTGTAAAACGTACACGATCTAC |
| 806rcbc17      | GCTTTAACGTGTGTGCCGTTTTACAACGTCGTGACTGGG |
| 806rcbc17_anti | AGCGCCCAGTCACGACGTTGTAAAACGGCACACACGTTA |
| 806rcbc18      | GCTTCATTATGGCGTGCGTTTTACAACGTCGTGACTGGG |

806rcbc18\_anti AGCGCCCAGTCACGACGTTGTAAAACGCACGCCATAATG  
806rcbc19 GCTTCCAATACGCCTGCGTTTTACAACGTCGTGACTGGG  
806rcbc19\_anti AGCGCCCAGTCACGACGTTGTAAAACGCAGGCGTATTGG  
806rcbc20 GCTTGATCTGCGATCCCGTTTTACAACGTCGTGACTGGG  
806rcbc20\_anti AGCGCCCAGTCACGACGTTGTAAAACGGGATCGCAGATC  
806rcbc21 GCTTCAGCTCATCAGCCGTTTTACAACGTCGTGACTGGG  
806rcbc21\_anti AGCGCCCAGTCACGACGTTGTAAAACGGCTGATGAGCTG  
806rcbc22 GCTTCAAACAACAGCTCGTTTTACAACGTCGTGACTGGG  
806rcbc22\_anti AGCGCCCAGTCACGACGTTGTAAAACGAGCTGTTGTTTG  
806rcbc23 GCTTGCAACACCATCCCGTTTTACAACGTCGTGACTGGG  
806rcbc23\_anti AGCGCCCAGTCACGACGTTGTAAAACGGGATGGTGTTC  
806rcbc24 GCTTGCGATATATCGCCGTTTTACAACGTCGTGACTGGG  
806rcbc24\_anti AGCGCCCAGTCACGACGTTGTAAAACGGCGATATATCGC  
806rcbc25 GCTTCGAGCAATCCTACGTTTTACAACGTCGTGACTGGG  
806rcbc25\_anti AGCGCCCAGTCACGACGTTGTAAAACGTAGGATTGCTCG  
806rcbc26 GCTTAGTCGTGCACATCGTTTTACAACGTCGTGACTGGG  
806rcbc26\_anti AGCGCCCAGTCACGACGTTGTAAAACGATGTGCACGACT  
806rcbc27 GCTTGTATCTGCGCGTCGTTTTACAACGTCGTGACTGGG  
806rcbc27\_anti AGCGCCCAGTCACGACGTTGTAAAACGACGCGCAGATAC  
806rcbc28 GCTTCGAGGGAAAGTCCGTTTTACAACGTCGTGACTGGG  
806rcbc28\_anti AGCGCCCAGTCACGACGTTGTAAAACGGACTTTCCCTCG  
806rcbc29 GCTTCAAATTCGGGATCGTTTTACAACGTCGTGACTGGG  
806rcbc29\_anti AGCGCCCAGTCACGACGTTGTAAAACGATCCCGAATTTG  
806rcbc30 GCTTAGATTGACCAACCGTTTTACAACGTCGTGACTGGG  
806rcbc30\_anti AGCGCCCAGTCACGACGTTGTAAAACGGTTGGTCAATCT  
806rcbc31 GCTTAGTTACGAGCTACGTTTTACAACGTCGTGACTGGG  
806rcbc31\_anti AGCGCCCAGTCACGACGTTGTAAAACGTAGCTCGTAACT  
806rcbc32 GCTTGCCATATGCACTGCGTTTTACAACGTCGTGACTGGG  
806rcbc32\_anti AGCGCCCAGTCACGACGTTGTAAAACGCAGTGCATATGC  
806rcbc33 GCTTCAACTCCCGTGACGTTTTACAACGTCGTGACTGGG  
806rcbc33\_anti AGCGCCCAGTCACGACGTTGTAAAACGTCACGGGAGTTG  
806rcbc34 GCTTTTGCGTTAGCAGCGTTTTACAACGTCGTGACTGGG  
806rcbc34\_anti AGCGCCCAGTCACGACGTTGTAAAACGCTGCTAACGCAA  
806rcbc35 GCTTTACGAGCCCTAACGTTTTACAACGTCGTGACTGGG  
806rcbc35\_anti AGCGCCCAGTCACGACGTTGTAAAACGTTAGGGCTCGTA  
806rcbc36 GCTTCACTACGCTAGACGTTTTACAACGTCGTGACTGGG  
806rcbc36\_anti AGCGCCCAGTCACGACGTTGTAAAACGTCTAGCGTAGTG  
806rcbc37 GCTTTGCAGTCCCTCGACGTTTTACAACGTCGTGACTGGG  
806rcbc37\_anti AGCGCCCAGTCACGACGTTGTAAAACGTCGAGGACTGCA  
806rcbc38 GCTTACCATAGCTCCGCGTTTTACAACGTCGTGACTGGG

806rcbc38\_anti AGCGCCCAGTCACGACGTTGTAAAACGCGGAGCTATGGT  
806rcbc39 GCTTTTCGACATCTCTTCGTTTTACAACGTCGTGACTGGG  
806rcbc39\_anti AGCGCCCAGTCACGACGTTGTAAAACGAAGAGATGTCTGA  
806rcbc40 GCTTGAACACTTTGGACGTTTTACAACGTCGTGACTGGG  
806rcbc40\_anti AGCGCCCAGTCACGACGTTGTAAAACGTCCAAAGTGTTT  
806rcbc41 GCTTGAGCCATCTGTACGTTTTACAACGTCGTGACTGGG  
806rcbc41\_anti AGCGCCCAGTCACGACGTTGTAAAACGTACAGATGGCTC  
806rcbc42 GCTTTTGGGTACACGTCGTTTTACAACGTCGTGACTGGG  
806rcbc42\_anti AGCGCCCAGTCACGACGTTGTAAAACGACGTGTACCCAA  
806rcbc43 GCTTAAGGCGCTCCTTCGTTTTACAACGTCGTGACTGGG  
806rcbc43\_anti AGCGCCCAGTCACGACGTTGTAAAACGAAGGAGCGCCTT  
806rcbc44 GCTTTAATACGGATCGCGTTTTACAACGTCGTGACTGGG  
806rcbc44\_anti AGCGCCCAGTCACGACGTTGTAAAACGCGATCCGTATTA  
806rcbc45 GCTTTTCGGAATTAGACCGTTTTACAACGTCGTGACTGGG  
806rcbc45\_anti AGCGCCCAGTCACGACGTTGTAAAACGGTCTAATTCCGA  
806rcbc46 GCTTTGTGAATTCGGACGTTTTACAACGTCGTGACTGGG  
806rcbc46\_anti AGCGCCCAGTCACGACGTTGTAAAACGTCCGAATTCACA  
806rcbc47 GCTTCATTCGTGGCGTCGTTTTACAACGTCGTGACTGGG  
806rcbc47\_anti AGCGCCCAGTCACGACGTTGTAAAACGACGCCACGAATG  
806rcbc48 GCTTTACTACGTGGCCCGTTTTACAACGTCGTGACTGGG  
806rcbc48\_anti AGCGCCCAGTCACGACGTTGTAAAACGGGCCACGTAGTA  
806rcbc49 GCTTGGCCAGTTCCTACGTTTTACAACGTCGTGACTGGG  
806rcbc49\_anti AGCGCCCAGTCACGACGTTGTAAAACGTAGGAACTGGCC  
806rcbc50 GCTTGATGTTTCGCTAGCGTTTTACAACGTCGTGACTGGG  
806rcbc50\_anti AGCGCCCAGTCACGACGTTGTAAAACGCTAGCGAACATC  
806rcbc51 GCTTCTATCTCCTGTCCGTTTTACAACGTCGTGACTGGG  
806rcbc51\_anti AGCGCCCAGTCACGACGTTGTAAAACGGACAGGAGATAG  
806rcbc52 GCTTACTCACAGGAATCGTTTTACAACGTCGTGACTGGG  
806rcbc52\_anti AGCGCCCAGTCACGACGTTGTAAAACGATTCCTGTGAGT  
806rcbc53 GCTTATGATGAGCCTCCGTTTTACAACGTCGTGACTGGG  
806rcbc53\_anti AGCGCCCAGTCACGACGTTGTAAAACGGAGGCTCATCAT  
806rcbc54 GCTTGTCGACAGAGGACGTTTTACAACGTCGTGACTGGG  
806rcbc54\_anti AGCGCCCAGTCACGACGTTGTAAAACGTCCTCTGTGAC  
806rcbc55 GCTTTGTGCGAAATAGCGTTTTACAACGTCGTGACTGGG  
806rcbc55\_anti AGCGCCCAGTCACGACGTTGTAAAACGCTATTTGCGACA  
806rcbc56 GCTTCATCCCTCTACTCGTTTTACAACGTCGTGACTGGG  
806rcbc56\_anti AGCGCCCAGTCACGACGTTGTAAAACGAGTAGAGGGATG  
806rcbc57 GCTTTATACCGCTGCGCGTTTTACAACGTCGTGACTGGG  
806rcbc57\_anti AGCGCCCAGTCACGACGTTGTAAAACGCGCAGCGGTATA  
806rcbc58 GCTTAGTTGAGGCATTCGTTTTACAACGTCGTGACTGGG

806rcbc58\_anti AGCGCCCAGTCACGACGTTGTAAAACGAATGCCTCAACT  
806rcbc59 GCTTACAATAGACACCCGTTTTACAACGTCGTGACTGGG  
806rcbc59\_anti AGCGCCCAGTCACGACGTTGTAAAACGGGTGTCTATTGT  
806rcbc60 GCTTCGGTCAATTGACCGTTTTACAACGTCGTGACTGGG  
806rcbc60\_anti AGCGCCCAGTCACGACGTTGTAAAACGGTCAATTGACCG  
806rcbc61 GCTTGTGGAGTCTCATCGTTTTACAACGTCGTGACTGGG  
806rcbc61\_anti AGCGCCCAGTCACGACGTTGTAAAACGATGAGACTCCAC  
806rcbc62 GCTTGCTCGAAGATTCCGTTTTACAACGTCGTGACTGGG  
806rcbc62\_anti AGCGCCCAGTCACGACGTTGTAAAACGGAATCTTCGAGC  
806rcbc63 GCTTAGGCTTACGTGTCGTTTTACAACGTCGTGACTGGG  
806rcbc63\_anti AGCGCCCAGTCACGACGTTGTAAAACGACACGTAAGCCT  
806rcbc64 GCTTTCTCTACCACTCCGTTTTACAACGTCGTGACTGGG  
806rcbc64\_anti AGCGCCCAGTCACGACGTTGTAAAACGGAGTGGTAGAGA  
806rcbc65 GCTTACTTCCAACCTCCGTTTTACAACGTCGTGACTGGG  
806rcbc65\_anti AGCGCCCAGTCACGACGTTGTAAAACGGAAGTTGGAAGT  
806rcbc66 GCTTCTCACCTAGGAACGTTTTACAACGTCGTGACTGGG  
806rcbc66\_anti AGCGCCCAGTCACGACGTTGTAAAACGTTCCCTAGGTGAG  
806rcbc67 GCTTGTGTTGTCGTGCCGTTTTACAACGTCGTGACTGGG  
806rcbc67\_anti AGCGCCCAGTCACGACGTTGTAAAACGGCACGACAACAC  
806rcbc68 GCTTCCACAGATCGATCGTTTTACAACGTCGTGACTGGG  
806rcbc68\_anti AGCGCCCAGTCACGACGTTGTAAAACGATCGATCTGTGG  
806rcbc69 GCTTTATCGACACAAGCGTTTTACAACGTCGTGACTGGG  
806rcbc69\_anti AGCGCCCAGTCACGACGTTGTAAAACGCTTGTGTCGATA  
806rcbc70 GCTTGATTCCGGCTCACGTTTTACAACGTCGTGACTGGG  
806rcbc70\_anti AGCGCCCAGTCACGACGTTGTAAAACGTGAGCCGGAATC  
806rcbc71 GCTTCGTAATTGCCGCCGTTTTACAACGTCGTGACTGGG  
806rcbc71\_anti AGCGCCCAGTCACGACGTTGTAAAACGGCGGCAATTACG  
806rcbc72 GCTTGGTGACTAGTTCCGTTTTACAACGTCGTGACTGGG  
806rcbc72\_anti AGCGCCCAGTCACGACGTTGTAAAACGGAAGTACTAGTACC  
806rcbc73 GCTTATGGGTTCCGTCCGTTTTACAACGTCGTGACTGGG  
806rcbc73\_anti AGCGCCCAGTCACGACGTTGTAAAACGGACGGAACCCAT  
806rcbc74 GCTTTAGGCATGCTTGCGTTTTACAACGTCGTGACTGGG  
806rcbc74\_anti AGCGCCCAGTCACGACGTTGTAAAACGCAAGCATGCCTA  
806rcbc75 GCTTAACTAGTTCAGGCGTTTTACAACGTCGTGACTGGG  
806rcbc75\_anti AGCGCCCAGTCACGACGTTGTAAAACGCCTGAACTAGTT  
806rcbc76 GCTTATTCTGCCGAAGCGTTTTACAACGTCGTGACTGGG  
806rcbc76\_anti AGCGCCCAGTCACGACGTTGTAAAACGCTTCGGCAGAAT  
806rcbc77 GCTTAGCATGTCCCGTCGTTTTACAACGTCGTGACTGGG  
806rcbc77\_anti AGCGCCCAGTCACGACGTTGTAAAACGACGGGACATGCT  
806rcbc78 GCTTGTACGATATGACCGTTTTACAACGTCGTGACTGGG

806rcbc78\_anti AGCGCCCAGTCACGACGTTGTAAAACGGTCATATCGTAC  
806rcbc79 GCTTGTGGTGGTTTTCCCGTTTTACAACGTCGTGACTGGG  
806rcbc79\_anti AGCGCCCAGTCACGACGTTGTAAAACGGGAAACCACCAC  
806rcbc80 GCTTTAGTATGCGCAACGTTTTACAACGTCGTGACTGGG  
806rcbc80\_anti AGCGCCCAGTCACGACGTTGTAAAACGTTGCGCATACTA  
806rcbc81 GCTTTGCGCTGAATGTCGTTTTACAACGTCGTGACTGGG  
806rcbc81\_anti AGCGCCCAGTCACGACGTTGTAAAACGACATTCAGCGCA  
806rcbc82 GCTTATGGCTGTCAGTCGTTTTACAACGTCGTGACTGGG  
806rcbc82\_anti AGCGCCCAGTCACGACGTTGTAAAACGACTGACAGCCAT  
806rcbc83 GCTTGTTCTCTTCTCGCGTTTTACAACGTCGTGACTGGG  
806rcbc83\_anti AGCGCCCAGTCACGACGTTGTAAAACGCGAGAAGAGAAC  
806rcbc84 GCTTCGTAAGATGCCTCGTTTTACAACGTCGTGACTGGG  
806rcbc84\_anti AGCGCCCAGTCACGACGTTGTAAAACGAGGCATCTTACG  
806rcbc85 GCTTGCGTTCTAGCTGCGTTTTACAACGTCGTGACTGGG  
806rcbc85\_anti AGCGCCCAGTCACGACGTTGTAAAACGCAGCTAGAACGC  
806rcbc86 GCTTGTTGTTCTGGGACGTTTTACAACGTCGTGACTGGG  
806rcbc86\_anti AGCGCCCAGTCACGACGTTGTAAAACGTCCCAGAACAAC  
806rcbc87 GCTTGGACTTCCAGCTCGTTTTACAACGTCGTGACTGGG  
806rcbc87\_anti AGCGCCCAGTCACGACGTTGTAAAACGAGCTGGAAGTCC  
806rcbc88 GCTTCTCACAACCGTGCGTTTTACAACGTCGTGACTGGG  
806rcbc88\_anti AGCGCCCAGTCACGACGTTGTAAAACGCACGGTTGTGAG  
806rcbc89 GCTTCTGCTATTCTCCGTTTTACAACGTCGTGACTGGG  
806rcbc89\_anti AGCGCCCAGTCACGACGTTGTAAAACGGAGGAATAGCAG  
806rcbc90 GCTTATGTCACCGCTGCGTTTTACAACGTCGTGACTGGG  
806rcbc90\_anti AGCGCCCAGTCACGACGTTGTAAAACGCAGCGGTGACAT  
806rcbc91 GCTTTGTAACGCCGATCGTTTTACAACGTCGTGACTGGG  
806rcbc91\_anti AGCGCCCAGTCACGACGTTGTAAAACGATCGGCGTTACA  
806rcbc92 GCTTAGCAGAACATCTCGTTTTACAACGTCGTGACTGGG  
806rcbc92\_anti AGCGCCCAGTCACGACGTTGTAAAACGAGATGTTCTGCT  
806rcbc93 GCTTTGGAGTAGGTGGCGTTTTACAACGTCGTGACTGGG  
806rcbc93\_anti AGCGCCCAGTCACGACGTTGTAAAACGCCACCTACTCCA  
806rcbc94 GCTTTTGGCTCTATTCCGTTTTACAACGTCGTGACTGGG  
806rcbc94\_anti AGCGCCCAGTCACGACGTTGTAAAACGGAATAGAGCCAA  
806rcbc95 GCTTGATCCCACGTACCGTTTTACAACGTCGTGACTGGG  
806rcbc95\_anti AGCGCCCAGTCACGACGTTGTAAAACGGTACGTGGGATC

**Table S4. PCR primers for multiplex Ion Torrent sequencing strategy.**

| <b>First- step PCR primers for Ion Torrent sequencing for well tagging</b> |                                        |                |                    |
|----------------------------------------------------------------------------|----------------------------------------|----------------|--------------------|
| <b>Forward primers (column tagging). Sequence (5'-3')</b>                  |                                        |                |                    |
| <b>Name</b>                                                                | <b>Forward landing pad<sup>†</sup></b> | <b>Barcode</b> | <b>Primer</b>      |
| 1_IT                                                                       | GCCCAGTCTACTCGAGGG                     | GCTA           | CATCACGCATGGTATGGA |
| 2_IT                                                                       | GCCCAGTCTACTCGAGGG                     | TGTGT          | CATCACGCATGGTATGGA |
| 3_IT                                                                       | GCCCAGTCTACTCGAGGG                     | AGTCTG         | CATCACGCATGGTATGGA |
| 4_IT                                                                       | GCCCAGTCTACTCGAGGG                     | ATCA           | CATCACGCATGGTATGGA |
| 5_IT                                                                       | GCCCAGTCTACTCGAGGG                     | GACGA          | CATCACGCATGGTATGGA |
| 6_IT                                                                       | GCCCAGTCTACTCGAGGG                     | TCGTCTG        | CATCACGCATGGTATGGA |
| 7_IT                                                                       | GCCCAGTCTACTCGAGGG                     | TGCT           | CATCACGCATGGTATGGA |
| 8_IT                                                                       | GCCCAGTCTACTCGAGGG                     | CAGTT          | CATCACGCATGGTATGGA |
| 9_IT                                                                       | GCCCAGTCTACTCGAGGG                     | ACATGT         | CATCACGCATGGTATGGA |
| 10_IT                                                                      | GCCCAGTCTACTCGAGGG                     | GCGG           | CATCACGCATGGTATGGA |
| 11_IT                                                                      | GCCCAGTCTACTCGAGGG                     | GTTGA          | CATCACGCATGGTATGGA |
| 12_IT                                                                      | GCCCAGTCTACTCGAGGG                     | GTGGCT         | CATCACGCATGGTATGGA |

  

| <b>Reverse primers (row tagging). Sequence (5'-3')</b> |                                        |                |                         |
|--------------------------------------------------------|----------------------------------------|----------------|-------------------------|
| <b>Name</b>                                            | <b>Reverse landing pad<sup>†</sup></b> | <b>Barcode</b> | <b>Primer</b>           |
| A_IT                                                   | ATCTCGGTGGTCGCCGTA                     | GCTC           | CCCAGTCACGACGTTGTAAAACG |
| B_IT                                                   | ATCTCGGTGGTCGCCGTA                     | CTAGT          | CCCAGTCACGACGTTGTAAAACG |
| C_IT                                                   | ATCTCGGTGGTCGCCGTA                     | TAGATC         | CCCAGTCACGACGTTGTAAAACG |
| D_IT                                                   | ATCTCGGTGGTCGCCGTA                     | TCGC           | CCCAGTCACGACGTTGTAAAACG |
| E_IT                                                   | ATCTCGGTGGTCGCCGTA                     | CCTTA          | CCCAGTCACGACGTTGTAAAACG |
| F_IT                                                   | ATCTCGGTGGTCGCCGTA                     | CATAAC         | CCCAGTCACGACGTTGTAAAACG |
| G_IT                                                   | ATCTCGGTGGTCGCCGTA                     | CAGA           | CCCAGTCACGACGTTGTAAAACG |
| H_IT                                                   | ATCTCGGTGGTCGCCGTA                     | TGTTC          | CCCAGTCACGACGTTGTAAAACG |

**Second-step PCR primers for Ion Torrent sequencing**

| <b>Plate tagging</b>                                                   |                                    |                            |                                       |
|------------------------------------------------------------------------|------------------------------------|----------------------------|---------------------------------------|
| <b>Forward primers (Library tagging). Sequence (5'-3')<sup>*</sup></b> |                                    |                            |                                       |
| <b>Name</b>                                                            | <b>IT adapter</b>                  | <b>Ion Xpress™ Barcode</b> | <b>Primer for Forward landing pad</b> |
| IT_A_FP_1                                                              | CCATCTCATCCCTGCGTGTCT<br>CCGACTCAG | CTAAGGT<br>AAC             | GATATAAAACCGCCCAGTCTA<br>CTCGAGGG     |
| IT_A_FP_2                                                              | CCATCTCATCCCTGCGTGTCT<br>CCGACTCAG | TAAGGAG<br>AAC             | GATATAAAACCGCCCAGTCTA<br>CTCGAGGG     |
| IT_A_FP_3                                                              | CCATCTCATCCCTGCGTGTCT<br>CCGACTCAG | AAGAGGA<br>TTC             | GATATAAAACCGCCCAGTCTA<br>CTCGAGGG     |

|            |                                    |                |                                   |
|------------|------------------------------------|----------------|-----------------------------------|
| IT_A_FP_4  | CCATCTCATCCCTGCGTGTCT<br>CCGACTCAG | TACCAAG<br>ATC | GATATAAAACCGCCCAGTCTA<br>CTCGAGGG |
| IT_A_FP_5  | CCATCTCATCCCTGCGTGTCT<br>CCGACTCAG | CAGAAGG<br>AAC | GATATAAAACCGCCCAGTCTA<br>CTCGAGGG |
| IT_A_FP_6  | CCATCTCATCCCTGCGTGTCT<br>CCGACTCAG | CTGCAAG<br>TTC | GATATAAAACCGCCCAGTCTA<br>CTCGAGGG |
| IT_A_FP_7  | CCATCTCATCCCTGCGTGTCT<br>CCGACTCAG | TTCGTGAT<br>TC | GATATAAAACCGCCCAGTCTA<br>CTCGAGGG |
| IT_A_FP_8  | CCATCTCATCCCTGCGTGTCT<br>CCGACTCAG | TTCCGATA<br>AC | GATATAAAACCGCCCAGTCTA<br>CTCGAGGG |
| IT_A_FP_9  | CCATCTCATCCCTGCGTGTCT<br>CCGACTCAG | TGAGCGG<br>AAC | GATATAAAACCGCCCAGTCTA<br>CTCGAGGG |
| IT_A_FP_10 | CCATCTCATCCCTGCGTGTCT<br>CCGACTCAG | CTGACCG<br>AAC | GATATAAAACCGCCCAGTCTA<br>CTCGAGGG |

| Reverse primer compatible with synthetic amplicons (IT adaptor). Sequence (5'-3') |                         |                                |
|-----------------------------------------------------------------------------------|-------------------------|--------------------------------|
| Name                                                                              | trP1 sequencing adapter | Primer for reverse landing pad |
| IT_trP1_FP_Sy<br>nthetic                                                          | CCTCTCTATGGGCAGTCGGTGAT | ATCTCGGTGGTCCCGTA              |

\* Modified from (29)

† Modified from Illumina Nextera transposase sequence

**Table S5. *PsnifH* evaluation in a competition assay of RlvUPM791[pOPS0263] vs Rlv3841[pOPS0262].**

| Inoculation<br>% of<br>UPM791 | Replicate | Blue<br>nodules<br>(Rlv3841) | Pink<br>nodules<br>(UPM791) | Mixed<br>nodules | % Blue<br>nodules<br>(Rlv3841) | % Pink<br>nodules<br>(UPM791) | % Mixed<br>nodules |
|-------------------------------|-----------|------------------------------|-----------------------------|------------------|--------------------------------|-------------------------------|--------------------|
| 50                            | 1         | NA                           | NA                          | NA               | NA                             | NA                            | NA                 |
| 50                            | 2         | 60                           | 94                          | 2                | 38.46                          | 60.26                         | 1.28               |
| 50                            | 3         | 71                           | 86                          | 2                | 44.65                          | 54.09                         | 1.26               |
| 50                            | 4         | 39                           | 138                         | 3                | 21.67                          | 76.67                         | 1.67               |
| 50                            | 5         | 62                           | 98                          | 2                | 38.27                          | 60.49                         | 1.23               |
| 50                            | 6         | 69                           | 81                          | 1                | 45.70                          | 53.64                         | 0.66               |
| 50                            | 7         | 52                           | 108                         | 3                | 31.90                          | 66.26                         | 1.84               |
| 50                            | 8         | 63                           | 141                         | 5                | 30.14                          | 67.46                         | 2.39               |
| 50                            | 9         | 72                           | 101                         | 4                | 40.68                          | 57.06                         | 2.26               |
| 50                            | 10        | 32                           | 122                         | 2                | 20.51                          | 78.21                         | 1.28               |
| 50                            | 11        | 58                           | 121                         | 3                | 31.87                          | 66.48                         | 1.65               |
| 50                            | 12        | 67                           | 144                         | 4                | 31.16                          | 66.98                         | 1.86               |
| 50                            | 13        | 62                           | 100                         | 2                | 37.80                          | 60.98                         | 1.22               |
| 50                            | 14        | 59                           | 127                         | 3                | 31.22                          | 67.20                         | 1.59               |
| 90                            | 1         | 7                            | 172                         | 1                | 3.89                           | 95.56                         | 0.56               |
| 90                            | 2         | 8                            | 185                         | 2                | 4.10                           | 94.87                         | 1.03               |
| 90                            | 3         | 15                           | 184                         | 2                | 7.46                           | 91.54                         | 1.00               |
| 90                            | 4         | 7                            | 188                         | 2                | 3.55                           | 95.43                         | 1.02               |
| 90                            | 5         | 8                            | 141                         | 1                | 5.33                           | 94.00                         | 0.67               |
| 90                            | 6         | 18                           | 119                         | 0                | 13.14                          | 86.86                         | 0.00               |
| 90                            | 7         | 10                           | 168                         | 1                | 5.59                           | 93.85                         | 0.56               |
| 90                            | 8         | 30                           | 189                         | 3                | 13.51                          | 85.14                         | 1.35               |
| 90                            | 9         | 26                           | 146                         | 2                | 14.94                          | 83.91                         | 1.15               |
| 90                            | 10        | 3                            | 114                         | 1                | 2.54                           | 96.61                         | 0.85               |

|           |    |     |     |    |       |       |      |
|-----------|----|-----|-----|----|-------|-------|------|
| <b>90</b> | 11 | 8   | 168 | 2  | 4.49  | 94.38 | 1.12 |
| <b>90</b> | 12 | 4   | 205 | 3  | 1.89  | 96.70 | 1.42 |
| <b>90</b> | 13 | 1   | 80  | 0  | 1.23  | 98.77 | 0.00 |
| <b>90</b> | 14 | 0   | 160 | 1  | 0.00  | 99.38 | 0.62 |
| <b>10</b> | 1  | 181 | 61  | 2  | 74.18 | 25.00 | 0.82 |
| <b>10</b> | 2  | NA  | NA  | NA | NA    | NA    | NA   |
| <b>10</b> | 3  | 115 | 20  | 0  | 85.19 | 14.81 | 0.00 |
| <b>10</b> | 4  | 221 | 4   | 2  | 97.36 | 1.76  | 0.88 |
| <b>10</b> | 5  | NA  | NA  | NA | NA    | NA    | NA   |
| <b>10</b> | 6  | 154 | 95  | 1  | 61.60 | 38.00 | 0.40 |
| <b>10</b> | 7  | 151 | 98  | 1  | 60.40 | 39.20 | 0.40 |
| <b>10</b> | 8  | 192 | 81  | 1  | 70.07 | 29.56 | 0.36 |
| <b>10</b> | 9  | 122 | 44  | 1  | 73.05 | 26.35 | 0.60 |
| <b>10</b> | 10 | 123 | 115 | 2  | 51.25 | 47.92 | 0.83 |
| <b>10</b> | 11 | NA  | NA  | NA | NA    | NA    | NA   |
| <b>10</b> | 12 | 72  | 36  | 0  | 66.67 | 33.33 | 0.00 |
| <b>10</b> | 13 | 152 | 43  | 2  | 77.16 | 21.83 | 1.02 |
| <b>10</b> | 14 | 135 | 52  | 1  | 71.81 | 27.66 | 0.53 |

\*NA: Dead plant or lost sample



**Table S6. Fluorescence from expression of sfGFP, acetylene reduced and shoot DW from nodules of pea plants inoculated with different rhizobial strains, harvested at 28, 35 and 42 dpi.**

| Strain         | Nodule fluorescence *               | ARA †                            | Shoot DW ‡                       | No. of nodules    | Nodule area §               |
|----------------|-------------------------------------|----------------------------------|----------------------------------|-------------------|-----------------------------|
| <b>28dpi</b>   |                                     |                                  |                                  |                   |                             |
| <b>WSM1475</b> | 6.19E+06 ±<br>1.42E+06 <sup>b</sup> | 1189.35 ±<br>74.78 <sup>b</sup>  | ND                               | 141.33 ±<br>24.92 | 1.70 ±<br>0.06 <sup>a</sup> |
| <b>Rlv3841</b> | 2.92E+08 ±<br>1.28E+07 <sup>a</sup> | 2758.50 ±<br>181.65 <sup>b</sup> | ND                               | 182.67 ±<br>24.88 | 2.23 ±<br>0.24              |
| <b>UPM791</b>  | 3.78E+08 ±<br>5.35E+07 <sup>a</sup> | 4613.00 ±<br>562.91 <sup>a</sup> | ND                               | 276.00 ±<br>37.75 | 1.88 ±<br>0.27              |
| <b>WSM1521</b> | 5.02E+08 ±<br>8.67E+07              | 9600.97 ±<br>1984.58             | ND                               | 176.00 ±<br>35.12 | 2.89 ±<br>0.50              |
| <b>35dpi</b>   |                                     |                                  |                                  |                   |                             |
| <b>WSM1475</b> | 1.47E+07 ±<br>1.57E+06 <sup>a</sup> | 2849.84 ±<br>385.46              | 333.33 ±<br>66.67 <sup>*</sup>   | 266.67 ±<br>23.47 | 1.44 ±<br>0.09 <sup>a</sup> |
| <b>Rlv3841</b> | 1.43E+08 ±<br>2.67E+07              | 4531.97 ±<br>932.35              | 776.00 ±<br>167.29 <sup>a</sup>  | 219.33 ±<br>44.36 | 2.16 ±<br>0.38              |
| <b>UPM791</b>  | 1.55E+08 ±<br>1.22E+07              | 5481.30 ±<br>621.64              | 916.67 ±<br>101.38               | 293.67 ±<br>23.90 | 1.93 ±<br>0.08              |
| <b>WSM1521</b> | 1.51E+08 ±<br>5.88E+07              | 3305.21 ±<br>525.85              | 1033.33 ±<br>185.59              | 138.00 ±<br>15.52 | 3.50 ±<br>0.74              |
| <b>42dpi</b>   |                                     |                                  |                                  |                   |                             |
| <b>WSM1475</b> | 2.01E+07 ±<br>2.12E+06              | ND                               | 800.00 ±<br>100 <sup>b</sup>     | 269.67 ±<br>18.85 | 1.67 ±<br>0.21 <sup>a</sup> |
| <b>Rlv3841</b> | 3.67E+08 ±<br>5.34E+07              | ND                               | 850.00 ±<br>28.87 <sup>b</sup>   | 295.67 ±<br>32.63 | 2.21 ±<br>0.28              |
| <b>UPM791</b>  | 1.79E+08 ±<br>7.04E+07              | ND                               | 1233.33 ±<br>185.59 <sup>a</sup> | 289.00 ±<br>41.58 | 2.58 ±<br>0.34              |
| <b>WSM1521</b> | 7.42E+07 ±<br>3.29E+07              | ND                               | 1750.00 ±<br>132.29              | 152.00 ±<br>13.58 | 2.96 ±<br>0.26              |

\*[cps][plant]<sup>-1</sup>, †Acetylene reduced in nanomoles of [C<sub>2</sub>H<sub>2</sub> reduced] [hour]<sup>-1</sup>[plant]<sup>-1</sup>, ‡[mg][plant]<sup>-1</sup>, § mm<sup>2</sup>[nodule]<sup>-1</sup>. ND, not determined.

Values are the mean from at least three biological replicates ± SEM. In the case of ARA values were obtained from three biological and three technical replicates.

Statistical analysis for each strain within the same time point were compared by One-way ANOVA (Dunnett's multiple comparisons test). Those that are significantly different to WSM1521 are indicated with <sup>a</sup> (P<0.05) and with <sup>b</sup> (P<0.005).

**Table S7. Golay barcode sequences and assigned position in a 96-well plate to be used as plasmid IDs.**

| Golay barcode    | Sequence      | Assigned position | Golay barcode    | Sequence      | Assigned position |
|------------------|---------------|-------------------|------------------|---------------|-------------------|
| <b>806rcbc0</b>  | TCCCTTGTCTCC  | A1                | <b>806rcbc48</b> | TACTACGTGGCC  | E1                |
| <b>806rcbc1</b>  | ACGAGACTGATT  | A2                | <b>806rcbc49</b> | GGCCAGTTCCTA  | E2                |
| <b>806rcbc2</b>  | GCTGTACGGATT  | A3                | <b>806rcbc50</b> | GATGTTGCTAG   | E3                |
| <b>806rcbc3</b>  | ATCACCAGGTGT  | A4                | <b>806rcbc51</b> | CTATCTCTGTC   | E4                |
| <b>806rcbc4</b>  | TGGTCAACGATA  | A5                | <b>806rcbc52</b> | ACTCACAGGAAT  | E5                |
| <b>806rcbc5</b>  | ATCGCACAGTAA  | A6                | <b>806rcbc53</b> | ATGATGAGCCTC  | E6                |
| <b>806rcbc6</b>  | GTCGTGTAGCCT  | A7                | <b>806rcbc54</b> | GTCGACAGAGGA  | E7                |
| <b>806rcbc7</b>  | AGCGGAGGTTAG  | A8                | <b>806rcbc55</b> | TGTCGCAAATAG  | E8                |
| <b>806rcbc8</b>  | ATCCTTTGGTTC  | A9                | <b>806rcbc56</b> | CATCCCTCTACT  | E9                |
| <b>806rcbc9</b>  | TACAGCGCATAC  | A10               | <b>806rcbc57</b> | TATACCGCTGCG  | E10               |
| <b>806rcbc10</b> | ACCGGTATGTAC  | A11               | <b>806rcbc58</b> | AGTTGAGGCATT  | E11               |
| <b>806rcbc11</b> | AATTGTGTCGGA  | A12               | <b>806rcbc59</b> | ACAATAGACACC  | E12               |
| <b>806rcbc12</b> | TGCATACACTGG  | B1                | <b>806rcbc60</b> | CGGTCAATTGAC  | F1                |
| <b>806rcbc13</b> | AGTCGAACGAGG  | B2                | <b>806rcbc61</b> | GTGGAGTCTCAT  | F2                |
| <b>806rcbc14</b> | ACCAGTGA CTCA | B3                | <b>806rcbc62</b> | GCTCGAAGATTC  | F3                |
| <b>806rcbc15</b> | GAATACCAAGTC  | B4                | <b>806rcbc63</b> | AGGCTTACGTGT  | F4                |
| <b>806rcbc16</b> | GTAGATCGTGTA  | B5                | <b>806rcbc64</b> | TCTCTACCACTC  | F5                |
| <b>806rcbc17</b> | TAACGTGTGTGC  | B6                | <b>806rcbc65</b> | ACTTCCA ACTTC | F6                |
| <b>806rcbc18</b> | CATTATGGCGTG  | B7                | <b>806rcbc66</b> | CTCACCTAGGAA  | F7                |
| <b>806rcbc19</b> | CCAATACGCCTG  | B8                | <b>806rcbc67</b> | GTGTTGTCGTGC  | F8                |
| <b>806rcbc20</b> | GATCTGCGATCC  | B9                | <b>806rcbc68</b> | CCACAGATCGAT  | F9                |
| <b>806rcbc21</b> | CAGCTCATCAGC  | B10               | <b>806rcbc69</b> | TATCGACACAAG  | F10               |
| <b>806rcbc22</b> | CAAACAACAGCT  | B11               | <b>806rcbc70</b> | GATTCCGGCTCA  | F11               |
| <b>806rcbc23</b> | GCAACACCATCC  | B12               | <b>806rcbc71</b> | CGTAATTGCCGC  | F12               |
| <b>806rcbc24</b> | GCGATATATCGC  | C1                | <b>806rcbc72</b> | GGTGA CTAGTTC | G1                |
| <b>806rcbc25</b> | CGAGCAATCCTA  | C2                | <b>806rcbc73</b> | ATGGGTTCCGTC  | G2                |
| <b>806rcbc26</b> | AGTCGTGCACAT  | C3                | <b>806rcbc74</b> | TAGGCATGCTTG  | G3                |
| <b>806rcbc27</b> | GTATCTGCGCGT  | C4                | <b>806rcbc75</b> | AACTAGTTCAGG  | G4                |
| <b>806rcbc28</b> | CGAGGGAAAGTC  | C5                | <b>806rcbc76</b> | ATTCTGCCGAAG  | G5                |
| <b>806rcbc29</b> | CAAATTCGGGAT  | C6                | <b>806rcbc77</b> | AGCATGTCCCGT  | G6                |
| <b>806rcbc30</b> | AGATTGACCAAC  | C7                | <b>806rcbc78</b> | GTACGATATGAC  | G7                |

|                  |              |     |                  |              |     |
|------------------|--------------|-----|------------------|--------------|-----|
| <b>806rcbc31</b> | AGTTACGAGCTA | C8  | <b>806rcbc79</b> | GTGGTGGTTTCC | G8  |
| <b>806rcbc32</b> | GCATATGCACTG | C9  | <b>806rcbc80</b> | TAGTATGCGCAA | G9  |
| <b>806rcbc33</b> | CAACTCCCCTGA | C10 | <b>806rcbc81</b> | TGCGCTGAATGT | G10 |
| <b>806rcbc34</b> | TTGCGTTAGCAG | C11 | <b>806rcbc82</b> | ATGGCTGTCAGT | G11 |
| <b>806rcbc35</b> | TACGAGCCCTAA | C12 | <b>806rcbc83</b> | GTTCTCTTCTCG | G12 |
| <b>806rcbc36</b> | CACTACGCTAGA | D1  | <b>806rcbc84</b> | CGTAAGATGCCT | H1  |
| <b>806rcbc37</b> | TGCAGTCCTCGA | D2  | <b>806rcbc85</b> | GCGTTCTAGCTG | H2  |
| <b>806rcbc38</b> | ACCATAGCTCCG | D3  | <b>806rcbc86</b> | GTTGTTCTGGGA | H3  |
| <b>806rcbc39</b> | TCGACATCTCTT | D4  | <b>806rcbc87</b> | GGACTTCCAGCT | H4  |
| <b>806rcbc40</b> | GAACACTTTGGA | D5  | <b>806rcbc88</b> | CTCACAACCGTG | H5  |
| <b>806rcbc41</b> | GAGCCATCTGTA | D6  | <b>806rcbc89</b> | CTGCTATTCTC  | H6  |
| <b>806rcbc42</b> | TTGGGTACACGT | D7  | <b>806rcbc90</b> | ATGTCACCGCTG | H7  |
| <b>806rcbc43</b> | AAGGCGCTCCTT | D8  | <b>806rcbc91</b> | TGTAACGCCGAT | H8  |
| <b>806rcbc44</b> | TAATACGGATCG | D9  | <b>806rcbc92</b> | AGCAGAACATCT | H9  |
| <b>806rcbc45</b> | TCGGAATTAGAC | D10 | <b>806rcbc93</b> | TGGAGTAGGTGG | H10 |
| <b>806rcbc46</b> | TGTGAATTCGGA | D11 | <b>806rcbc94</b> | TTGGCTCTATTC | H11 |
| <b>806rcbc47</b> | CATTCGTGGCGT | D12 | <b>806rcbc95</b> | GATCCCACGTAC | H12 |

**Table S8. Methods performed to obtain chemical composition.**

| <b>Methods</b>                                                     | <b>Accreditation*</b> |
|--------------------------------------------------------------------|-----------------------|
| pH Determination                                                   | DM007                 |
| Soil Extraction – 0.43M Acetic Acid – Ca, Mg, K & P                | DM005                 |
| Inductively coupled plasma–Optical Emission Spectroscopy (ICP-OES) | BM005                 |
| Soil Extraction – 1M KCl – NO <sub>3</sub> & NH <sub>4</sub>       | N/A                   |
| Analysis 1M KCl Extractions                                        | N/A                   |
| Moisture Determination                                             | DM007                 |

\*United Kingdom Accreditation Service (UKAS) approved methods

**Table S9. Chemical composition of Yatesbury House Farm soil.**

| Sample         | pH   | Ca <sup>+</sup> | K <sup>+</sup> | Mg <sup>+</sup> | P <sup>+</sup> | NO <sub>3</sub> <sup>+</sup> | NH <sub>4</sub> <sup>+</sup> |
|----------------|------|-----------------|----------------|-----------------|----------------|------------------------------|------------------------------|
| Yatesbury soil | 7.75 | 458             | 0.58           | 3.25            | 115.6          | 64.02                        | 13.05                        |

Values are expressed in <sup>+</sup>[cmol] [kg]<sup>-1</sup> or <sup>+</sup>[mg][kg]<sup>-1</sup>

**Table S10. Full list of the strain occurrence.**

| Strain or combination            | Occurrence | Strain or combination        | Occurrence | Strain or combination   | Occurrence |
|----------------------------------|------------|------------------------------|------------|-------------------------|------------|
| Riv3841-WSM1475-G093-H082-H031   | 1          | 24-H082                      | 1          | G0077-L111              | 2          |
| Riv3841-WSM1475-V050             | 1          | WSM1475-G093-H082-H031       | 1          | G093-H082-H031          | 2          |
| Riv3841-WSM1488                  | 1          | Riv3841-WSM1475-V116-V006    | 1          | SU303-G083              | 2          |
| BeanLA_2A                        | 1          | WSM1475-G093-L111            | 1          | G093-H031               | 2          |
| Riv3841-WSM1488-G0077-G093-VSX28 | 1          | G051-VSX28-H031              | 1          | V006-H031               | 2          |
| G004                             | 1          | WSM1475-H031                 | 1          | WSM1475-13              | 2          |
| SU303-G0077-G083-G109            | 1          | G083-L010                    | 1          | V006-H082               | 2          |
| 536-H174                         | 1          | WSM1475-SU303                | 1          | Riv3841-G093-H082-E2_1A | 2          |
| V006-L018-E2_1A                  | 1          | G093-G083                    | 1          | Riv3841-WSM1475-G093    | 2          |
| G007-G109                        | 1          | WSM1475-SU303-G083           | 1          | WSM1475-G051            | 2          |
| G051-G083-G067-VSX28-H031        | 1          | G093-H174                    | 1          | WSM1475-V006            | 2          |
| G0077-G093-H082-H031             | 1          | WSM1475-V043                 | 1          | WSM1529                 | 2          |
| G067-L111                        | 1          | G109-H174                    | 1          | SU303-G109              | 2          |
| SU303-G067                       | 1          | WSM1475-V116                 | 1          | Riv3841-H082-E2_1A-H031 | 2          |
| G083-H178                        | 1          | H174-VSX28-H031              | 1          | G109-L111               | 2          |
| SU303-G083-G067                  | 1          | WSM1475-VSX28-L111           | 1          | G109-G067-L111          | 2          |
| G088                             | 1          | L102-V006                    | 1          | SU303-L111              | 2          |
| SU303-H174-G067-L111             | 1          | WSM1475-WSM1488-G0077        | 1          | Riv3841-G051-VSX28-H031 | 2          |
| G093-G067                        | 1          | Riv3841-H031                 | 1          | L082                    | 2          |
| SU303-V116                       | 1          | WSM1488-13-G0077-L111        | 1          | H082-E2_1A              | 2          |
| G093-G083-H082                   | 1          | Riv3841-PB3-3-G109-G067      | 1          | G094                    | 2          |
| UPM791-G067                      | 1          | WSM1488-G051                 | 1          | 24                      | 3          |
| G093-H082-G067-H031              | 1          | Riv3841-V006-G093-H082-H031  | 1          | V057                    | 3          |
| UPM791-V006                      | 1          | WSM1488-V006-H082            | 1          | Riv3841-G067            | 3          |
| G093-L018                        | 1          | Riv3841-WSM1475-13-VSX28     | 1          | V116-V006               | 3          |
| V006-24-H082                     | 1          | Riv3841-G093-H082-E2_1A-H031 | 1          | VF2                     | 3          |
| G109-H082-VSX28-H031             | 1          | 13-G0077-V006-G109-L111      | 1          | G093-H082-E2_1A-H031    | 3          |
| V006-G067                        | 1          | Riv3841-H082-E2_1A           | 1          | H178                    | 4          |
| H082-G067                        | 1          | G0077-G109                   | 1          | L018-E2_1A              | 4          |
| V006-G083-L008                   | 1          | H082-E2_1A-H031              | 1          | VSX28                   | 5          |
| H174-G067                        | 1          | G088-L111                    | 1          | L102                    | 5          |
| V006-G094                        | 1          | V006-H082-E2_1A              | 1          | L111                    | 6          |
| L008-H082                        | 1          | G109-H082                    | 1          | UPM791                  | 6          |
| V006-G109-H082                   | 1          | E2_1A-H031                   | 1          | L079                    | 6          |
| L102-G083                        | 1          | L008-L018-H031               | 1          | L018                    | 6          |

|                              |   |                                      |   |         |     |
|------------------------------|---|--------------------------------------|---|---------|-----|
| V006-H082-H031               | 1 | Riv3841-E2_1A                        | 1 | V050    | 7   |
| PB3-3-G093                   | 1 | Riv3841-H174                         | 1 | 536     | 7   |
| V006-L018                    | 1 | Riv3841-536-E2_1A                    | 1 | WSM1488 | 7   |
| Riv3841-G067-VSX28           | 1 | Riv3841-V116-L079                    | 1 | G051    | 8   |
| V010                         | 1 | Riv3841-SU303-L079-E2_1A             | 1 | L010    | 9   |
| Riv3841-H082                 | 1 | Riv3841-WSM1475-V116-H174-VSX28-H031 | 1 | E2_1A   | 9   |
| V030                         | 1 | VSX28-L018-E2_1A                     | 1 | PB3-3   | 13  |
| Riv3841-L008-H031            | 1 | G093-G109                            | 1 | H174    | 15  |
| V116-H082                    | 1 | WSM1475-L018-E2_1A                   | 1 | L008    | 16  |
| Riv3841-SU303                | 1 | PB3-3-L008                           | 1 | H082    | 19  |
| V116-H174-L111               | 1 | WSM1475-G0077-L018-E2_1A             | 1 | G093    | 20  |
| Riv3841-V006-G067-VSX28-H031 | 1 | Riv3841-WSM1475-G0077-G093           | 1 | SU303   | 22  |
| V116-VSX28-H031              | 1 | PB3-3-E2_1A                          | 1 | H031    | 24  |
| Riv3841-V006-H082-H031       | 1 | H082-VSX28                           | 1 | V006    | 30  |
| VSX28-H031                   | 1 | Riv3841-G093-E2_1A                   | 1 | WSM1475 | 30  |
| Riv3841-WSM1475-13-V006-H031 | 1 | G067-VSX28                           | 1 | Riv3841 | 33  |
| VSX28-L111-H031              | 1 | Riv3841-536-L008-E2_1A               | 1 | G0077   | 34  |
| Riv3841-WSM1475-G0077-G083   | 1 | Riv3841-V006                         | 1 | G109    | 39  |
| WSM1475-G0077-V006-G093-H031 | 1 | L008-E2_1A                           | 1 | G067    | 40  |
| Riv3841-WSM1475-G0077-V006   | 1 | G0077-G083                           | 2 | V116    | 54  |
| WSM1475-G093-G109            | 1 | V006-G093-H082-H031                  | 2 | G083    | 117 |

**Table S11. Full statistical analysis of Competitiveness Index (CI)**

| ANOVA summary                               |            |                    |              |                    |          |
|---------------------------------------------|------------|--------------------|--------------|--------------------|----------|
| F                                           |            |                    |              | 16.02              |          |
| P value                                     |            |                    |              | <0.0001            |          |
| P value summary                             |            |                    |              | ****               |          |
| Significant diff. among means (P < 0.05)?   |            |                    |              | Yes                |          |
| R square                                    |            |                    |              | 0.3269             |          |
| Brown-Forsythe test                         |            |                    |              |                    |          |
| F (DFn, DFd)                                |            |                    |              | 1.599 (9, 297)     |          |
| P value                                     |            |                    |              | 0.1147             |          |
| P value summary                             |            |                    |              | ns                 |          |
| Are SDs significantly different (P < 0.05)? |            |                    |              | No                 |          |
| Bartlett's test                             |            |                    |              |                    |          |
| Bartlett's statistic (corrected)            |            |                    |              | 26.68              |          |
| P value                                     |            |                    |              | 0.0016             |          |
| P value summary                             |            |                    |              | **                 |          |
| Are SDs significantly different (P < 0.05)? |            |                    |              | Yes                |          |
| ANOVA table                                 |            |                    |              |                    |          |
|                                             | SS         | DF                 | MS           | F (DFn, DFd)       | P value  |
| Treatment (between columns)                 | 4136       | 9                  | 459.5        | F (9, 297) = 16.02 | P<0.0001 |
| Residual (within columns)                   | 8517       | 297                | 28.68        |                    |          |
| Total                                       | 12652      | 306                |              |                    |          |
| Data summary                                |            |                    |              |                    |          |
| Number of treatments (columns)              |            |                    |              |                    | 10       |
| Number of values (total)                    |            |                    |              |                    | 307      |
| Number of families                          |            |                    |              |                    |          |
|                                             |            |                    |              |                    | 1        |
| Number of comparisons per family            |            |                    |              |                    |          |
|                                             |            |                    |              |                    | 45       |
| Alpha                                       |            |                    |              |                    |          |
|                                             |            |                    |              |                    | 0.05     |
| Tukey's multiple comparisons test           |            |                    |              |                    |          |
|                                             | Mean Diff. | 95.00% CI of diff. | Significant? | Adjusted P Value   |          |
| SU303 vs. H031                              | 0.1387     | -4.197 to 4.475    | ns           | >0.9999            | A-B      |
| SU303 vs. V006                              | -0.1681    | -4.504 to 4.168    | ns           | >0.9999            | A-C      |
| SU303 vs. WSM1475                           | -0.3748    | -4.711 to 3.961    | ns           | >0.9999            | A-D      |
| SU303 vs. Rlv3841                           | -0.9531    | -5.325 to 3.419    | ns           | 0.9995             | A-E      |
| SU303 vs. G0077                             | -1.46      | -5.796 to 2.876    | ns           | 0.9869             | A-F      |
| SU303 vs. G109                              | -1.092     | -5.464 to 3.280    | ns           | 0.9986             | A-G      |
| SU303 vs. G067                              | -1.633     | -5.969 to 2.703    | ns           | 0.9719             | A-H      |



|                     |         |                  |      |         |     |
|---------------------|---------|------------------|------|---------|-----|
| SU303 vs. V116      | -3.597  | -7.933 to 0.7390 | ns   | 0.2019  | A-I |
| SU303 vs. G083      | -12.87  | -17.24 to -8.496 | **** | <0.0001 | A-J |
| H031 vs. V006       | -0.3068 | -4.643 to 4.029  | ns   | >0.9999 | B-C |
| H031 vs. WSM1475    | -0.5135 | -4.850 to 3.823  | ns   | >0.9999 | B-D |
| H031 vs. Rlv3841    | -1.092  | -5.464 to 3.280  | ns   | 0.9986  | B-E |
| H031 vs. G0077      | -1.599  | -5.935 to 2.737  | ns   | 0.9755  | B-F |
| H031 vs. G109       | -1.23   | -5.603 to 3.142  | ns   | 0.9965  | B-G |
| H031 vs. G067       | -1.772  | -6.108 to 2.565  | ns   | 0.9525  | B-H |
| H031 vs. V116       | -3.736  | -8.072 to 0.6003 | ns   | 0.1603  | B-I |
| H031 vs. G083       | -13.01  | -17.38 to -8.634 | **** | <0.0001 | B-J |
| V006 vs. WSM1475    | -0.2068 | -4.543 to 4.129  | ns   | >0.9999 | C-D |
| V006 vs. Rlv3841    | -0.785  | -5.157 to 3.587  | ns   | >0.9999 | C-E |
| V006 vs. G0077      | -1.292  | -5.628 to 3.044  | ns   | 0.9946  | C-F |
| V006 vs. G109       | -0.9237 | -5.296 to 3.448  | ns   | 0.9996  | C-G |
| V006 vs. G067       | -1.465  | -5.801 to 2.871  | ns   | 0.9866  | C-H |
| V006 vs. V116       | -3.429  | -7.765 to 0.9071 | ns   | 0.2616  | C-I |
| V006 vs. G083       | -12.7   | -17.07 to -8.328 | **** | <0.0001 | C-J |
| WSM1475 vs. Rlv3841 | -0.5782 | -4.950 to 3.794  | ns   | >0.9999 | D-E |
| WSM1475 vs. G0077   | -1.085  | -5.422 to 3.251  | ns   | 0.9986  | D-F |
| WSM1475 vs. G109    | -0.7169 | -5.089 to 3.655  | ns   | >0.9999 | D-G |
| WSM1475 vs. G067    | -1.258  | -5.594 to 3.078  | ns   | 0.9956  | D-H |
| WSM1475 vs. V116    | -3.222  | -7.558 to 1.114  | ns   | 0.3484  | D-I |
| WSM1475 vs. G083    | -12.49  | -16.86 to -8.121 | **** | <0.0001 | D-J |
| Rlv3841 vs. G0077   | -0.5073 | -4.879 to 3.865  | ns   | >0.9999 | E-F |
| Rlv3841 vs. G109    | -0.1387 | -4.546 to 4.269  | ns   | >0.9999 | E-G |
| Rlv3841 vs. G067    | -0.6798 | -5.052 to 3.692  | ns   | >0.9999 | E-H |
| Rlv3841 vs. V116    | -2.644  | -7.016 to 1.728  | ns   | 0.65    | E-I |
| Rlv3841 vs. G083    | -11.91  | -16.32 to -7.507 | **** | <0.0001 | E-J |
| G0077 vs. G109      | 0.3686  | -4.003 to 4.741  | ns   | >0.9999 | F-G |
| G0077 vs. G067      | -0.1726 | -4.509 to 4.164  | ns   | >0.9999 | F-H |
| G0077 vs. V116      | -2.137  | -6.473 to 2.199  | ns   | 0.8611  | F-I |
| G0077 vs. G083      | -11.41  | -15.78 to -7.035 | **** | <0.0001 | F-J |
| G109 vs. G067       | -0.5412 | -4.913 to 3.831  | ns   | >0.9999 | G-H |
| G109 vs. V116       | -2.505  | -6.877 to 1.867  | ns   | 0.7177  | G-I |
| G109 vs. G083       | -11.78  | -16.18 to -7.368 | **** | <0.0001 | G-J |
| G067 vs. V116       | -1.964  | -6.300 to 2.372  | ns   | 0.9122  | H-I |
| G067 vs. G083       | -11.23  | -15.61 to -6.863 | **** | <0.0001 | H-J |
| V116 vs. G083       | -9.271  | -13.64 to -4.899 | **** | <0.0001 | I-J |

| Test details      | Mean 1 | Mean 2 | Mean Diff. | SE of diff. | n1 | n2 | q      | DF  |
|-------------------|--------|--------|------------|-------------|----|----|--------|-----|
| SU303 vs. H031    | 3.272  | 3.133  | 0.1387     | 1.36        | 31 | 31 | 0.1442 | 297 |
| SU303 vs. V006    | 3.272  | 3.44   | -0.1681    | 1.36        | 31 | 31 | 0.1747 | 297 |
| SU303 vs. WSM1475 | 3.272  | 3.646  | -0.3748    | 1.36        | 31 | 31 | 0.3897 | 297 |
| SU303 vs. Rlv3841 | 3.272  | 4.225  | -0.9531    | 1.371       | 31 | 30 | 0.9828 | 297 |
| SU303 vs. G0077   | 3.272  | 4.732  | -1.46      | 1.36        | 31 | 31 | 1.518  | 297 |
| SU303 vs. G109    | 3.272  | 4.363  | -1.092     | 1.371       | 31 | 30 | 1.126  | 297 |
| SU303 vs. G067    | 3.272  | 4.905  | -1.633     | 1.36        | 31 | 31 | 1.698  | 297 |
| SU303 vs. V116    | 3.272  | 6.869  | -3.597     | 1.36        | 31 | 31 | 3.74   | 297 |
| SU303 vs. G083    | 3.272  | 16.14  | -12.87     | 1.371       | 31 | 30 | 13.27  | 297 |
| H031 vs. V006     | 3.133  | 3.44   | -0.3068    | 1.36        | 31 | 31 | 0.319  | 297 |
| H031 vs. WSM1475  | 3.133  | 3.646  | -0.5135    | 1.36        | 31 | 31 | 0.534  | 297 |

|                     |       |       |         |       |    |    |        |     |
|---------------------|-------|-------|---------|-------|----|----|--------|-----|
| H031 vs. Rlv3841    | 3.133 | 4.225 | -1.092  | 1.371 | 31 | 30 | 1.126  | 297 |
| H031 vs. G0077      | 3.133 | 4.732 | -1.599  | 1.36  | 31 | 31 | 1.663  | 297 |
| H031 vs. G109       | 3.133 | 4.363 | -1.23   | 1.371 | 31 | 30 | 1.269  | 297 |
| H031 vs. G067       | 3.133 | 4.905 | -1.772  | 1.36  | 31 | 31 | 1.842  | 297 |
| H031 vs. V116       | 3.133 | 6.869 | -3.736  | 1.36  | 31 | 31 | 3.884  | 297 |
| H031 vs. G083       | 3.133 | 16.14 | -13.01  | 1.371 | 31 | 30 | 13.41  | 297 |
| V006 vs. WSM1475    | 3.44  | 3.646 | -0.2068 | 1.36  | 31 | 31 | 0.215  | 297 |
| V006 vs. Rlv3841    | 3.44  | 4.225 | -0.785  | 1.371 | 31 | 30 | 0.8095 | 297 |
| V006 vs. G0077      | 3.44  | 4.732 | -1.292  | 1.36  | 31 | 31 | 1.344  | 297 |
| V006 vs. G109       | 3.44  | 4.363 | -0.9237 | 1.371 | 31 | 30 | 0.9525 | 297 |
| V006 vs. G067       | 3.44  | 4.905 | -1.465  | 1.36  | 31 | 31 | 1.523  | 297 |
| V006 vs. V116       | 3.44  | 6.869 | -3.429  | 1.36  | 31 | 31 | 3.565  | 297 |
| V006 vs. G083       | 3.44  | 16.14 | -12.7   | 1.371 | 31 | 30 | 13.1   | 297 |
| WSM1475 vs. Rlv3841 | 3.646 | 4.225 | -0.5782 | 1.371 | 31 | 30 | 0.5963 | 297 |
| WSM1475 vs. G0077   | 3.646 | 4.732 | -1.085  | 1.36  | 31 | 31 | 1.129  | 297 |
| WSM1475 vs. G109    | 3.646 | 4.363 | -0.7169 | 1.371 | 31 | 30 | 0.7392 | 297 |
| WSM1475 vs. G067    | 3.646 | 4.905 | -1.258  | 1.36  | 31 | 31 | 1.308  | 297 |
| WSM1475 vs. V116    | 3.646 | 6.869 | -3.222  | 1.36  | 31 | 31 | 3.35   | 297 |
| WSM1475 vs. G083    | 3.646 | 16.14 | -12.49  | 1.371 | 31 | 30 | 12.88  | 297 |
| Rlv3841 vs. G0077   | 4.225 | 4.732 | -0.5073 | 1.371 | 30 | 31 | 0.5231 | 297 |
| Rlv3841 vs. G109    | 4.225 | 4.363 | -0.1387 | 1.383 | 30 | 30 | 0.1418 | 297 |
| Rlv3841 vs. G067    | 4.225 | 4.905 | -0.6798 | 1.371 | 30 | 31 | 0.7011 | 297 |
| Rlv3841 vs. V116    | 4.225 | 6.869 | -2.644  | 1.371 | 30 | 31 | 2.727  | 297 |
| Rlv3841 vs. G083    | 4.225 | 16.14 | -11.91  | 1.383 | 30 | 30 | 12.19  | 297 |
| G0077 vs. G109      | 4.732 | 4.363 | 0.3686  | 1.371 | 31 | 30 | 0.3801 | 297 |
| G0077 vs. G067      | 4.732 | 4.905 | -0.1726 | 1.36  | 31 | 31 | 0.1794 | 297 |
| G0077 vs. V116      | 4.732 | 6.869 | -2.137  | 1.36  | 31 | 31 | 2.222  | 297 |
| G0077 vs. G083      | 4.732 | 16.14 | -11.41  | 1.371 | 31 | 30 | 11.76  | 297 |
| G109 vs. G067       | 4.363 | 4.905 | -0.5412 | 1.371 | 30 | 31 | 0.5581 | 297 |
| G109 vs. V116       | 4.363 | 6.869 | -2.505  | 1.371 | 30 | 31 | 2.584  | 297 |
| G109 vs. G083       | 4.363 | 16.14 | -11.78  | 1.383 | 30 | 30 | 12.04  | 297 |
| G067 vs. V116       | 4.905 | 6.869 | -1.964  | 1.36  | 31 | 31 | 2.042  | 297 |
| G067 vs. G083       | 4.905 | 16.14 | -11.23  | 1.371 | 31 | 30 | 11.59  | 297 |
| V116 vs. G083       | 6.869 | 16.14 | -9.271  | 1.371 | 31 | 30 | 9.56   | 297 |

**Table S12. Full statistical analysis of effectiveness by GFP detection.**

| ANOVA summary                               |                 |                    |              |                     |          |
|---------------------------------------------|-----------------|--------------------|--------------|---------------------|----------|
| F                                           | 19.83           |                    |              |                     |          |
| P value                                     | <0.0001         |                    |              |                     |          |
| P value summary                             | ****            |                    |              |                     |          |
| Significant diff. among means (P < 0.05)?   | Yes             |                    |              |                     |          |
| R square                                    | 0.608           |                    |              |                     |          |
| Brown-Forsythe test                         |                 |                    |              |                     |          |
| F (DFn, DFd)                                | 3.538 (14, 179) |                    |              |                     |          |
| P value                                     | <0.0001         |                    |              |                     |          |
| P value summary                             | ****            |                    |              |                     |          |
| Are SDs significantly different (P < 0.05)? | Yes             |                    |              |                     |          |
| ANOVA table                                 |                 |                    |              |                     |          |
|                                             | SS              | DF                 | MS           | F (DFn, DFd)        | P value  |
| Treatment (between columns)                 | 2.187E+14       | 14                 | 1.56E+13     | F (14, 179) = 19.83 | P<0.0001 |
| Residual (within columns)                   | 1.41E+14        | 179                | 7.88E+11     |                     |          |
| Total                                       | 3.596E+14       | 193                |              |                     |          |
| Data summary                                |                 |                    |              |                     |          |
| Number of treatments (columns)              | 15              |                    |              |                     |          |
| Number of values (total)                    | 194             |                    |              |                     |          |
| Number of families                          | 1               |                    |              |                     |          |
| Number of comparisons per family            | 105             |                    |              |                     |          |
| Alpha                                       | 0.05            |                    |              |                     |          |
| Tukey's multiple comparisons test           |                 |                    |              |                     |          |
|                                             | Mean Diff.      | 95.00% CI of diff. | Significant? | Adjusted P Value    |          |
| G083 vs. V116                               | 1779988         | 1081663 to 2478313 | ****         | <0.0001             | A-B      |
| G083 vs. G067                               | 1918909         | 1006968 to 2830850 | ****         | <0.0001             | A-C      |
| G083 vs. G109                               | 2187275         | 1243159 to 3131391 | ****         | <0.0001             | A-D      |
| G083 vs. G0077                              | 2122117         | 1099071 to 3145162 | ****         | <0.0001             | A-E      |
| G083 vs. Rlv3841                            | 2662809         | 1531648 to 3793970 | ****         | <0.0001             | A-F      |
| G083 vs. H031                               | 2359658         | 1228497 to 3490819 | ****         | <0.0001             | A-G      |
| G083 vs. L008                               | 1189810         | -12639 to 2392259  | ns           | 0.0557              | A-H      |
| G083 vs. WSM1475                            | 2117194         | 825801 to 3408586  | ****         | <0.0001             | A-I      |
| G083 vs. H082                               | 2489873         | 1083377 to 3896370 | ****         | <0.0001             | A-J      |

|                         |         |                     |      |         |     |
|-------------------------|---------|---------------------|------|---------|-----|
| <b>G083 vs. PB3-3</b>   | 2314184 | 907688 to 3720681   | **** | <0.0001 | A-K |
| <b>G083 vs. H174</b>    | 1714805 | 151463 to 3278146   | *    | 0.0173  | A-L |
| <b>G083 vs. G093</b>    | 2089565 | 526223 to 3652906   | ***  | 0.0008  | A-M |
| <b>G083 vs. SU303</b>   | 2847993 | 1053452 to 4642534  | **** | <0.0001 | A-N |
| <b>G083 vs. WSM1488</b> | 2715069 | 920528 to 4509610   | **** | <0.0001 | A-O |
| <b>V116 vs. G067</b>    | 138921  | -904758 to 1182600  | ns   | >0.9999 | B-C |
| <b>V116 vs. G109</b>    | 407287  | -664620 to 1479194  | ns   | 0.9929  | B-D |
| <b>V116 vs. G0077</b>   | 342129  | -799910 to 1484168  | ns   | 0.9994  | B-E |
| <b>V116 vs. Rlv3841</b> | 882821  | -356999 to 2122642  | ns   | 0.4824  | B-F |
| <b>V116 vs. H031</b>    | 579670  | -660151 to 1819490  | ns   | 0.9549  | B-G |
| <b>V116 vs. L008</b>    | -590178 | -1895365 to 715009  | ns   | 0.9657  | B-H |
| <b>V116 vs. WSM1475</b> | 337206  | -1050356 to 1724767 | ns   | >0.9999 | B-I |
| <b>V116 vs. H082</b>    | 709885  | -785395 to 2205165  | ns   | 0.9491  | B-J |
| <b>V116 vs. PB3-3</b>   | 534196  | -961084 to 2029476  | ns   | 0.9962  | B-K |
| <b>V116 vs. H174</b>    | -65183  | -1708858 to 1578492 | ns   | >0.9999 | B-L |
| <b>V116 vs. G093</b>    | 309577  | -1334098 to 1953252 | ns   | >0.9999 | B-M |
| <b>V116 vs. SU303</b>   | 1068005 | -796937 to 2932946  | ns   | 0.8131  | B-N |
| <b>V116 vs. WSM1488</b> | 935081  | -929860 to 2800023  | ns   | 0.9228  | B-O |
| <b>G067 vs. G109</b>    | 268366  | -953503 to 1490235  | ns   | >0.9999 | C-D |
| <b>G067 vs. G0077</b>   | 203208  | -1080627 to 1487042 | ns   | >0.9999 | C-E |
| <b>G067 vs. Rlv3841</b> | 743900  | -627644 to 2115445  | ns   | 0.8668  | C-F |
| <b>G067 vs. H031</b>    | 440749  | -930796 to 1812293  | ns   | 0.9987  | C-G |
| <b>G067 vs. L008</b>    | -729099 | -2160005 to 701807  | ns   | 0.9132  | C-H |
| <b>G067 vs. WSM1475</b> | 198285  | -1308137 to 1704706 | ns   | >0.9999 | C-I |
| <b>G067 vs. H082</b>    | 570964  | -1035224 to 2177152 | ns   | 0.9964  | C-J |
| <b>G067 vs. PB3-3</b>   | 395275  | -1210913 to 2001463 | ns   | >0.9999 | C-K |
| <b>G067 vs. H174</b>    | -204104 | -1949282 to 1541074 | ns   | >0.9999 | C-L |
| <b>G067 vs. G093</b>    | 170656  | -1574522 to 1915834 | ns   | >0.9999 | C-M |
| <b>G067 vs. SU303</b>   | 929084  | -1025907 to 2884074 | ns   | 0.9486  | C-N |
| <b>G067 vs. WSM1488</b> | 796160  | -1158830 to 2751151 | ns   | 0.9863  | C-O |
| <b>G109 vs. G0077</b>   | -65158  | -1372044 to 1241727 | ns   | >0.9999 | D-E |
| <b>G109 vs. Rlv3841</b> | 475534  | -917610 to 1868679  | ns   | 0.9976  | D-F |
| <b>G109 vs. H031</b>    | 172383  | -1220762 to 1565528 | ns   | >0.9999 | D-G |
| <b>G109 vs. L008</b>    | -997465 | -2449088 to 454159  | ns   | 0.5452  | D-H |
| <b>G109 vs. WSM1475</b> | -70081  | -1596195 to 1456032 | ns   | >0.9999 | D-I |
| <b>G109 vs. H082</b>    | 302598  | -1322074 to 1927270 | ns   | >0.9999 | D-J |
| <b>G109 vs. PB3-3</b>   | 126909  | -1497763 to 1751581 | ns   | >0.9999 | D-K |
| <b>G109 vs. H174</b>    | -472470 | -2234675 to 1289734 | ns   | 0.9998  | D-L |
| <b>G109 vs. G093</b>    | -97710  | -1859915 to 1664494 | ns   | >0.9999 | D-M |

|                            |          |                     |    |         |     |
|----------------------------|----------|---------------------|----|---------|-----|
| <b>G109 vs. SU303</b>      | 660718   | -1309487 to 2630922 | ns | 0.998   | D-N |
| <b>G109 vs. WSM1488</b>    | 527795   | -1442410 to 2497999 | ns | 0.9998  | D-O |
| <b>G0077 vs. Rlv3841</b>   | 540693   | -907106 to 1988491  | ns | 0.994   | E-F |
| <b>G0077 vs. H031</b>      | 237541   | -1210258 to 1685340 | ns | >0.9999 | E-G |
| <b>G0077 vs. L008</b>      | -932306  | -2436461 to 571848  | ns | 0.7118  | E-H |
| <b>G0077 vs. WSM1475</b>   | -4923    | -1581087 to 1571240 | ns | >0.9999 | E-I |
| <b>G0077 vs. H082</b>      | 367757   | -1304017 to 2039530 | ns | >0.9999 | E-J |
| <b>G0077 vs. PB3-3</b>     | 192068   | -1479706 to 1863841 | ns | >0.9999 | E-K |
| <b>G0077 vs. H174</b>      | -407312  | -2213034 to 1398410 | ns | >0.9999 | E-L |
| <b>G0077 vs. G093</b>      | -32552   | -1838274 to 1773170 | ns | >0.9999 | E-M |
| <b>G0077 vs. SU303</b>     | 725876   | -1283346 to 2735098 | ns | 0.9957  | E-N |
| <b>G0077 vs. WSM1488</b>   | 592953   | -1416269 to 2602175 | ns | 0.9995  | E-O |
| <b>Rlv3841 vs. H031</b>    | -303152  | -1829265 to 1222962 | ns | >0.9999 | F-G |
| <b>Rlv3841 vs. L008</b>    | -1472999 | -3052677 to 106679  | ns | 0.0968  | F-H |
| <b>Rlv3841 vs. WSM1475</b> | -545616  | -2194007 to 1102775 | ns | 0.9983  | F-I |
| <b>Rlv3841 vs. H082</b>    | -172936  | -1912974 to 1567101 | ns | >0.9999 | F-J |
| <b>Rlv3841 vs. PB3-3</b>   | -348625  | -2088663 to 1391412 | ns | >0.9999 | F-K |
| <b>Rlv3841 vs. H174</b>    | -948005  | -2817105 to 921095  | ns | 0.916   | F-L |
| <b>Rlv3841 vs. G093</b>    | -573245  | -2442345 to 1295855 | ns | 0.9993  | F-M |
| <b>Rlv3841 vs. SU303</b>   | 185183   | -1881184 to 2251551 | ns | >0.9999 | F-N |
| <b>Rlv3841 vs. WSM1488</b> | 52260    | -2014108 to 2118628 | ns | >0.9999 | F-O |
| <b>H031 vs. L008</b>       | -1169847 | -2749525 to 409830  | ns | 0.4129  | G-H |
| <b>H031 vs. WSM1475</b>    | -242464  | -1890855 to 1405927 | ns | >0.9999 | G-I |
| <b>H031 vs. H082</b>       | 130216   | -1609822 to 1870253 | ns | >0.9999 | G-J |
| <b>H031 vs. PB3-3</b>      | -45473   | -1785511 to 1694564 | ns | >0.9999 | G-K |
| <b>H031 vs. H174</b>       | -644853  | -2513953 to 1224247 | ns | 0.9973  | G-L |
| <b>H031 vs. G093</b>       | -270093  | -2139193 to 1599007 | ns | >0.9999 | G-M |
| <b>H031 vs. SU303</b>      | 488335   | -1578033 to 2554703 | ns | >0.9999 | G-N |
| <b>H031 vs. WSM1488</b>    | 355412   | -1710956 to 2421780 | ns | >0.9999 | G-O |
| <b>L008 vs. WSM1475</b>    | 927383   | -770719 to 2625486  | ns | 0.8607  | H-I |
| <b>L008 vs. H082</b>       | 1300063  | -487138 to 3087264  | ns | 0.4445  | H-J |
| <b>L008 vs. PB3-3</b>      | 1124374  | -662827 to 2911575  | ns | 0.6898  | H-K |
| <b>L008 vs. H174</b>       | 524995   | -1388090 to 2438079 | ns | 0.9998  | H-L |
| <b>L008 vs. G093</b>       | 899755   | -1013330 to 2812839 | ns | 0.9527  | H-M |
| <b>L008 vs. SU303</b>      | 1658183  | -448054 to 3764420  | ns | 0.309   | H-N |
| <b>L008 vs. WSM1488</b>    | 1525259  | -580978 to 3631496  | ns | 0.4525  | H-O |
| <b>WSM1475 vs. H082</b>    | 372680   | -1475536 to 2220895 | ns | >0.9999 | I-J |
| <b>WSM1475 vs. PB3-3</b>   | 196991   | -1651225 to 2045206 | ns | >0.9999 | I-K |
| <b>WSM1475 vs. H174</b>    | -402389  | -2372593 to 1567816 | ns | >0.9999 | I-L |

|                            |         |                     |    |         |     |
|----------------------------|---------|---------------------|----|---------|-----|
| <b>WSM1475 vs. G093</b>    | -27629  | -1997833 to 1942576 | ns | >0.9999 | I-M |
| <b>WSM1475 vs. SU303</b>   | 730799  | -1427452 to 2889050 | ns | 0.9978  | I-N |
| <b>WSM1475 vs. WSM1488</b> | 597876  | -1560375 to 2756127 | ns | 0.9998  | I-O |
| <b>H082 vs. PB3-3</b>      | -175689 | -2106087 to 1754709 | ns | >0.9999 | J-K |
| <b>H082 vs. H174</b>       | -775068 | -2822565 to 1272428 | ns | 0.9932  | J-L |
| <b>H082 vs. G093</b>       | -400308 | -2447805 to 1647188 | ns | >0.9999 | J-M |
| <b>H082 vs. SU303</b>      | 358120  | -1870912 to 2587151 | ns | >0.9999 | J-N |
| <b>H082 vs. WSM1488</b>    | 225196  | -2003836 to 2454228 | ns | >0.9999 | J-O |
| <b>PB3-3 vs. H174</b>      | -599379 | -2646876 to 1448117 | ns | 0.9996  | K-L |
| <b>PB3-3 vs. G093</b>      | -224619 | -2272116 to 1822877 | ns | >0.9999 | K-M |
| <b>PB3-3 vs. SU303</b>     | 533809  | -1695223 to 2762840 | ns | >0.9999 | K-N |
| <b>PB3-3 vs. WSM1488</b>   | 400885  | -1828147 to 2629917 | ns | >0.9999 | K-O |
| <b>H174 vs. G093</b>       | 374760  | -1783491 to 2533011 | ns | >0.9999 | L-M |
| <b>H174 vs. SU303</b>      | 1133188 | -1197989 to 3464365 | ns | 0.9388  | L-N |
| <b>H174 vs. WSM1488</b>    | 1000265 | -1330913 to 3331442 | ns | 0.9781  | L-O |
| <b>G093 vs. SU303</b>      | 758428  | -1572749 to 3089605 | ns | 0.9986  | M-N |
| <b>G093 vs. WSM1488</b>    | 625505  | -1705673 to 2956682 | ns | 0.9998  | M-O |
| <b>SU303 vs. WSM1488</b>   | -132923 | -2625057 to 2359210 | ns | >0.9999 | N-O |

| Test details            | Mean 1  | Mean 2  | Mean Diff. | SE of diff. | n1 | n2 | q      | DF  |
|-------------------------|---------|---------|------------|-------------|----|----|--------|-----|
| <b>G083 vs. V116</b>    | 3088426 | 1308438 | 1779988    | 203033      | 81 | 25 | 12.4   | 179 |
| <b>G083 vs. G067</b>    | 3088426 | 1169517 | 1918909    | 265140      | 81 | 13 | 10.24  | 179 |
| <b>G083 vs. G109</b>    | 3088426 | 901151  | 2187275    | 274495      | 81 | 12 | 11.27  | 179 |
| <b>G083 vs. G0077</b>   | 3088426 | 966309  | 2122117    | 297443      | 81 | 10 | 10.09  | 179 |
| <b>G083 vs. Rlv3841</b> | 3088426 | 425616  | 2662809    | 328877      | 81 | 8  | 11.45  | 179 |
| <b>G083 vs. H031</b>    | 3088426 | 728768  | 2359658    | 328877      | 81 | 8  | 10.15  | 179 |
| <b>G083 vs. L008</b>    | 3088426 | 1898616 | 1189810    | 349603      | 81 | 7  | 4.813  | 179 |
| <b>G083 vs. WSM1475</b> | 3088426 | 971232  | 2117194    | 375463      | 81 | 6  | 7.975  | 179 |
| <b>G083 vs. H082</b>    | 3088426 | 598553  | 2489873    | 408928      | 81 | 5  | 8.611  | 179 |
| <b>G083 vs. PB3-3</b>   | 3088426 | 774242  | 2314184    | 408928      | 81 | 5  | 8.003  | 179 |
| <b>G083 vs. H174</b>    | 3088426 | 1373621 | 1714805    | 454530      | 81 | 4  | 5.335  | 179 |
| <b>G083 vs. G093</b>    | 3088426 | 998861  | 2089565    | 454530      | 81 | 4  | 6.501  | 179 |
| <b>G083 vs. SU303</b>   | 3088426 | 240433  | 2847993    | 521750      | 81 | 3  | 7.72   | 179 |
| <b>G083 vs. WSM1488</b> | 3088426 | 373356  | 2715069    | 521750      | 81 | 3  | 7.359  | 179 |
| <b>V116 vs. G067</b>    | 1308438 | 1169517 | 138921     | 303442      | 25 | 13 | 0.6475 | 179 |
| <b>V116 vs. G109</b>    | 1308438 | 901151  | 407287     | 311649      | 25 | 12 | 1.848  | 179 |
| <b>V116 vs. G0077</b>   | 1308438 | 966309  | 342129     | 332039      | 25 | 10 | 1.457  | 179 |
| <b>V116 vs. Rlv3841</b> | 1308438 | 425616  | 882821     | 360469      | 25 | 8  | 3.464  | 179 |

|                          |         |         |         |        |    |    |         |     |
|--------------------------|---------|---------|---------|--------|----|----|---------|-----|
| <b>V116 vs. H031</b>     | 1308438 | 728768  | 579670  | 360469 | 25 | 8  | 2.274   | 179 |
| <b>V116 vs. L008</b>     | 1308438 | 1898616 | -590178 | 379474 | 25 | 7  | 2.199   | 179 |
| <b>V116 vs. WSM1475</b>  | 1308438 | 971232  | 337206  | 403423 | 25 | 6  | 1.182   | 179 |
| <b>V116 vs. H082</b>     | 1308438 | 598553  | 709885  | 434742 | 25 | 5  | 2.309   | 179 |
| <b>V116 vs. PB3-3</b>    | 1308438 | 774242  | 534196  | 434742 | 25 | 5  | 1.738   | 179 |
| <b>V116 vs. H174</b>     | 1308438 | 1373621 | -65183  | 477886 | 25 | 4  | 0.1929  | 179 |
| <b>V116 vs. G093</b>     | 1308438 | 998861  | 309577  | 477886 | 25 | 4  | 0.9161  | 179 |
| <b>V116 vs. SU303</b>    | 1308438 | 240433  | 1068005 | 542218 | 25 | 3  | 2.786   | 179 |
| <b>V116 vs. WSM1488</b>  | 1308438 | 373356  | 935081  | 542218 | 25 | 3  | 2.439   | 179 |
| <b>G067 vs. G109</b>     | 1169517 | 901151  | 268366  | 355249 | 13 | 12 | 1.068   | 179 |
| <b>G067 vs. G0077</b>    | 1169517 | 966309  | 203208  | 373265 | 13 | 10 | 0.7699  | 179 |
| <b>G067 vs. Rlv3841</b>  | 1169517 | 425616  | 743900  | 398766 | 13 | 8  | 2.638   | 179 |
| <b>G067 vs. H031</b>     | 1169517 | 728768  | 440749  | 398766 | 13 | 8  | 1.563   | 179 |
| <b>G067 vs. L008</b>     | 1169517 | 1898616 | -729099 | 416025 | 13 | 7  | 2.478   | 179 |
| <b>G067 vs. WSM1475</b>  | 1169517 | 971232  | 198285  | 437981 | 13 | 6  | 0.6402  | 179 |
| <b>G067 vs. H082</b>     | 1169517 | 598553  | 570964  | 466987 | 13 | 5  | 1.729   | 179 |
| <b>G067 vs. PB3-3</b>    | 1169517 | 774242  | 395275  | 466987 | 13 | 5  | 1.197   | 179 |
| <b>G067 vs. H174</b>     | 1169517 | 1373621 | -204104 | 507398 | 13 | 4  | 0.5689  | 179 |
| <b>G067 vs. G093</b>     | 1169517 | 998861  | 170656  | 507398 | 13 | 4  | 0.4756  | 179 |
| <b>G067 vs. SU303</b>    | 1169517 | 240433  | 929084  | 568399 | 13 | 3  | 2.312   | 179 |
| <b>G067 vs. WSM1488</b>  | 1169517 | 373356  | 796160  | 568399 | 13 | 3  | 1.981   | 179 |
| <b>G109 vs. G0077</b>    | 901151  | 966309  | -65158  | 379967 | 12 | 10 | 0.2425  | 179 |
| <b>G109 vs. Rlv3841</b>  | 901151  | 425616  | 475534  | 405047 | 12 | 8  | 1.66    | 179 |
| <b>G109 vs. H031</b>     | 901151  | 728768  | 172383  | 405047 | 12 | 8  | 0.6019  | 179 |
| <b>G109 vs. L008</b>     | 901151  | 1898616 | -997465 | 422049 | 12 | 7  | 3.342   | 179 |
| <b>G109 vs. WSM1475</b>  | 901151  | 971232  | -70081  | 443706 | 12 | 6  | 0.2234  | 179 |
| <b>G109 vs. H082</b>     | 901151  | 598553  | 302598  | 472361 | 12 | 5  | 0.906   | 179 |
| <b>G109 vs. PB3-3</b>    | 901151  | 774242  | 126909  | 472361 | 12 | 5  | 0.38    | 179 |
| <b>G109 vs. H174</b>     | 901151  | 1373621 | -472470 | 512348 | 12 | 4  | 1.304   | 179 |
| <b>G109 vs. G093</b>     | 901151  | 998861  | -97710  | 512348 | 12 | 4  | 0.2697  | 179 |
| <b>G109 vs. SU303</b>    | 901151  | 240433  | 660718  | 572822 | 12 | 3  | 1.631   | 179 |
| <b>G109 vs. WSM1488</b>  | 901151  | 373356  | 527795  | 572822 | 12 | 3  | 1.303   | 179 |
| <b>G0077 vs. Rlv3841</b> | 966309  | 425616  | 540693  | 420937 | 10 | 8  | 1.817   | 179 |
| <b>G0077 vs. H031</b>    | 966309  | 728768  | 237541  | 420937 | 10 | 8  | 0.7981  | 179 |
| <b>G0077 vs. L008</b>    | 966309  | 1898616 | -932306 | 437322 | 10 | 7  | 3.015   | 179 |
| <b>G0077 vs. WSM1475</b> | 966309  | 971232  | -4923   | 458258 | 10 | 6  | 0.01519 | 179 |
| <b>G0077 vs. H082</b>    | 966309  | 598553  | 367757  | 486056 | 10 | 5  | 1.07    | 179 |
| <b>G0077 vs. PB3-3</b>   | 966309  | 774242  | 192068  | 486056 | 10 | 5  | 0.5588  | 179 |
| <b>G0077 vs. H174</b>    | 966309  | 1373621 | -407312 | 525000 | 10 | 4  | 1.097   | 179 |

|                            |         |         |          |        |    |   |         |     |
|----------------------------|---------|---------|----------|--------|----|---|---------|-----|
| <b>G0077 vs. G093</b>      | 966309  | 998861  | -32552   | 525000 | 10 | 4 | 0.08769 | 179 |
| <b>G0077 vs. SU303</b>     | 966309  | 240433  | 725876   | 584166 | 10 | 3 | 1.757   | 179 |
| <b>G0077 vs. WSM1488</b>   | 966309  | 373356  | 592953   | 584166 | 10 | 3 | 1.435   | 179 |
| <b>Rlv3841 vs. H031</b>    | 425616  | 728768  | -303152  | 443706 | 8  | 8 | 0.9662  | 179 |
| <b>Rlv3841 vs. L008</b>    | 425616  | 1898616 | -1472999 | 459280 | 8  | 7 | 4.536   | 179 |
| <b>Rlv3841 vs. WSM1475</b> | 425616  | 971232  | -545616  | 479258 | 8  | 6 | 1.61    | 179 |
| <b>Rlv3841 vs. H082</b>    | 425616  | 598553  | -172936  | 505903 | 8  | 5 | 0.4834  | 179 |
| <b>Rlv3841 vs. PB3-3</b>   | 425616  | 774242  | -348625  | 505903 | 8  | 5 | 0.9746  | 179 |
| <b>Rlv3841 vs. H174</b>    | 425616  | 1373621 | -948005  | 543427 | 8  | 4 | 2.467   | 179 |
| <b>Rlv3841 vs. G093</b>    | 425616  | 998861  | -573245  | 543427 | 8  | 4 | 1.492   | 179 |
| <b>Rlv3841 vs. SU303</b>   | 425616  | 240433  | 185183   | 600781 | 8  | 3 | 0.4359  | 179 |
| <b>Rlv3841 vs. WSM1488</b> | 425616  | 373356  | 52260    | 600781 | 8  | 3 | 0.123   | 179 |
| <b>H031 vs. L008</b>       | 728768  | 1898616 | -1169847 | 459280 | 8  | 7 | 3.602   | 179 |
| <b>H031 vs. WSM1475</b>    | 728768  | 971232  | -242464  | 479258 | 8  | 6 | 0.7155  | 179 |
| <b>H031 vs. H082</b>       | 728768  | 598553  | 130216   | 505903 | 8  | 5 | 0.364   | 179 |
| <b>H031 vs. PB3-3</b>      | 728768  | 774242  | -45473   | 505903 | 8  | 5 | 0.1271  | 179 |
| <b>H031 vs. H174</b>       | 728768  | 1373621 | -644853  | 543427 | 8  | 4 | 1.678   | 179 |
| <b>H031 vs. G093</b>       | 728768  | 998861  | -270093  | 543427 | 8  | 4 | 0.7029  | 179 |
| <b>H031 vs. SU303</b>      | 728768  | 240433  | 488335   | 600781 | 8  | 3 | 1.15    | 179 |
| <b>H031 vs. WSM1488</b>    | 728768  | 373356  | 355412   | 600781 | 8  | 3 | 0.8366  | 179 |
| <b>L008 vs. WSM1475</b>    | 1898616 | 971232  | 927383   | 493711 | 7  | 6 | 2.656   | 179 |
| <b>L008 vs. H082</b>       | 1898616 | 598553  | 1300063  | 519616 | 7  | 5 | 3.538   | 179 |
| <b>L008 vs. PB3-3</b>      | 1898616 | 774242  | 1124374  | 519616 | 7  | 5 | 3.06    | 179 |
| <b>L008 vs. H174</b>       | 1898616 | 1373621 | 524995   | 556215 | 7  | 4 | 1.335   | 179 |
| <b>L008 vs. G093</b>       | 1898616 | 998861  | 899755   | 556215 | 7  | 4 | 2.288   | 179 |
| <b>L008 vs. SU303</b>      | 1898616 | 240433  | 1658183  | 612373 | 7  | 3 | 3.829   | 179 |
| <b>L008 vs. WSM1488</b>    | 1898616 | 373356  | 1525259  | 612373 | 7  | 3 | 3.522   | 179 |
| <b>WSM1475 vs. H082</b>    | 971232  | 598553  | 372680   | 537355 | 6  | 5 | 0.9808  | 179 |
| <b>WSM1475 vs. PB3-3</b>   | 971232  | 774242  | 196991   | 537355 | 6  | 5 | 0.5184  | 179 |
| <b>WSM1475 vs. H174</b>    | 971232  | 1373621 | -402389  | 572822 | 6  | 4 | 0.9934  | 179 |
| <b>WSM1475 vs. G093</b>    | 971232  | 998861  | -27629   | 572822 | 6  | 4 | 0.06821 | 179 |
| <b>WSM1475 vs. SU303</b>   | 971232  | 240433  | 730799   | 627495 | 6  | 3 | 1.647   | 179 |
| <b>WSM1475 vs. WSM1488</b> | 971232  | 373356  | 597876   | 627495 | 6  | 3 | 1.347   | 179 |
| <b>H082 vs. PB3-3</b>      | 598553  | 774242  | -175689  | 561249 | 5  | 5 | 0.4427  | 179 |
| <b>H082 vs. H174</b>       | 598553  | 1373621 | -775068  | 595294 | 5  | 4 | 1.841   | 179 |
| <b>H082 vs. G093</b>       | 598553  | 998861  | -400308  | 595294 | 5  | 4 | 0.951   | 179 |
| <b>H082 vs. SU303</b>      | 598553  | 240433  | 358120   | 648075 | 5  | 3 | 0.7815  | 179 |
| <b>H082 vs. WSM1488</b>    | 598553  | 373356  | 225196   | 648075 | 5  | 3 | 0.4914  | 179 |
| <b>PB3-3 vs. H174</b>      | 774242  | 1373621 | -599379  | 595294 | 5  | 4 | 1.424   | 179 |



|                          |         |        |         |        |   |   |        |     |
|--------------------------|---------|--------|---------|--------|---|---|--------|-----|
| <b>PB3-3 vs. G093</b>    | 774242  | 998861 | -224619 | 595294 | 5 | 4 | 0.5336 | 179 |
| <b>PB3-3 vs. SU303</b>   | 774242  | 240433 | 533809  | 648075 | 5 | 3 | 1.165  | 179 |
| <b>PB3-3 vs. WSM1488</b> | 774242  | 373356 | 400885  | 648075 | 5 | 3 | 0.8748 | 179 |
| <b>H174 vs. G093</b>     | 1373621 | 998861 | 374760  | 627495 | 4 | 4 | 0.8446 | 179 |
| <b>H174 vs. SU303</b>    | 1373621 | 240433 | 1133188 | 677773 | 4 | 3 | 2.364  | 179 |
| <b>H174 vs. WSM1488</b>  | 1373621 | 373356 | 1000265 | 677773 | 4 | 3 | 2.087  | 179 |
| <b>G093 vs. SU303</b>    | 998861  | 240433 | 758428  | 677773 | 4 | 3 | 1.583  | 179 |
| <b>G093 vs. WSM1488</b>  | 998861  | 373356 | 625505  | 677773 | 4 | 3 | 1.305  | 179 |
| <b>SU303 vs. WSM1488</b> | 240433  | 373356 | -132923 | 724569 | 3 | 3 | 0.2594 | 179 |

**Table S13. Results of effectiveness assessment of selected strains by ARA at 21 dpi**

|                | No. of nodules | Total nodule fresh weight † | Average nodule fresh weight † | ARA ‡       |
|----------------|----------------|-----------------------------|-------------------------------|-------------|
| <b>WC</b>      | 0              | 0                           | 0                             | 0.10 ± 0.03 |
| <b>Rlv3841</b> | 142.75± 13.24  | 0.38 ± 0.03                 | 2.75 ± 0.22                   | 4.72 ± 0.55 |
| <b>V116</b>    | 165.75± 15.14  | 0.37 ± 0.03                 | 2.23 ± 0.15                   | 4.26 ± 0.39 |
| <b>G083</b>    | 112.75± 23.10  | 0.34 ± 0.02                 | 3.32 ± 0.59                   | 7.53 ± 1.17 |

\*[gr] [plant]<sup>-1</sup>, † [mg] [nodule]<sup>-1</sup>[plant]<sup>-1</sup>, ‡ Acetylene reduced in nanomoles of [μmoles of C<sub>2</sub>H<sub>2</sub> reduced][hr]<sup>-1</sup>[plant]<sup>-1</sup>. Values are the mean from at least four biological replicates ± SEM. In the case of ARA values were obtained from four biological and three technical replicates.

**Table S14. Full statistical analysis of effectiveness assessment of selected strains by ARA[plant]<sup>-1</sup>**

|                                                       |                  |                    |              |                   |          |         |       |    |
|-------------------------------------------------------|------------------|--------------------|--------------|-------------------|----------|---------|-------|----|
| <b>Table Analyzed</b>                                 | <b>ARA/plant</b> |                    |              |                   |          |         |       |    |
| <b>Data sets analyzed</b>                             | A-D              |                    |              |                   |          |         |       |    |
| <b>ANOVA summary</b>                                  |                  |                    |              |                   |          |         |       |    |
| <b>F</b>                                              | 20.70            |                    |              |                   |          |         |       |    |
| <b>P value</b>                                        | <0.0001          |                    |              |                   |          |         |       |    |
| <b>P value summary</b>                                | ****             |                    |              |                   |          |         |       |    |
| <b>Significant diff. among means (P &lt; 0.05)?</b>   | Yes              |                    |              |                   |          |         |       |    |
| <b>R squared</b>                                      | 0.8381           |                    |              |                   |          |         |       |    |
| <b>Brown-Forsythe test</b>                            |                  |                    |              |                   |          |         |       |    |
| <b>F (DFn, DFd)</b>                                   | 17.81 (3, 12)    |                    |              |                   |          |         |       |    |
| <b>P value</b>                                        | 0.0001           |                    |              |                   |          |         |       |    |
| <b>P value summary</b>                                | ***              |                    |              |                   |          |         |       |    |
| <b>Are SDs significantly different (P &lt; 0.05)?</b> | Yes              |                    |              |                   |          |         |       |    |
| <b>Bartlett's test</b>                                |                  |                    |              |                   |          |         |       |    |
| <b>Bartlett's statistic (corrected)</b>               | 17.77            |                    |              |                   |          |         |       |    |
| <b>P value</b>                                        | 0.0005           |                    |              |                   |          |         |       |    |
| <b>P value summary</b>                                | ***              |                    |              |                   |          |         |       |    |
| <b>Are SDs significantly different (P &lt; 0.05)?</b> | Yes              |                    |              |                   |          |         |       |    |
| <b>ANOVA table</b>                                    | SS               | DF                 | MS           | F (DFn, DFd)      | P value  |         |       |    |
| <b>Treatment (between columns)</b>                    | 112.8            | 3                  | 37.61        | F (3, 12) = 20.70 | P<0.0001 |         |       |    |
| <b>Residual (within columns)</b>                      | 21.80            | 12                 | 1.817        |                   |          |         |       |    |
| <b>Total</b>                                          | 134.6            | 15                 |              |                   |          |         |       |    |
| <b>Data summary</b>                                   |                  |                    |              |                   |          |         |       |    |
| <b>Number of treatments (columns)</b>                 | 4                |                    |              |                   |          |         |       |    |
| <b>Number of values (total)</b>                       | 16               |                    |              |                   |          |         |       |    |
| <b>Number of families</b>                             | 1                |                    |              |                   |          |         |       |    |
| <b>Number of comparisons per family</b>               | 3                |                    |              |                   |          |         |       |    |
| <b>Alpha</b>                                          | 0.05             |                    |              |                   |          |         |       |    |
| <b>Dunnett's multiple comparisons test</b>            | Mean Diff.       | 95.00% CI of diff. | Significant? | Adjusted P Value  | D-?      |         |       |    |
| <b>G083 vs. WC</b>                                    | 7.436            | 4.879 to 9.993     | ****         | <0.0001           | A        | WC      |       |    |
| <b>G083 vs. Rlv3841</b>                               | 2.813            | 0.2555 to 5.370    | *            | 0.0310            | B        | Rlv3841 |       |    |
| <b>G083 vs. V116</b>                                  | 3.270            | 0.7130 to 5.827    | *            | 0.0130            | C        | V116    |       |    |
| <b>Test details</b>                                   | Mean 1           | Mean 2             | Mean Diff.   | SE of diff.       | n1       | n2      | q     | DF |
| <b>G083 vs. WC</b>                                    | 7.532            | 0.09592            | 7.436        | 0.9531            | 4        | 4       | 7.802 | 12 |
| <b>G083 vs. Rlv3841</b>                               | 7.532            | 4.719              | 2.813        | 0.9531            | 4        | 4       | 2.951 | 12 |
| <b>G083 vs. V116</b>                                  | 7.532            | 4.262              | 3.270        | 0.9531            | 4        | 4       | 3.431 | 12 |

**Table S15. Results of effectiveness assessment of selected strains by DW at 42dpi.**

|                | No. of nodules<br>[plant] <sup>-1</sup> | Total nodule<br>fresh weight<br>* | Average<br>nodule fresh<br>weight † | No. of<br>pods<br>[plant] <sup>-1</sup> | Pods DW ‡        | Total shoot<br>DW ‡ |
|----------------|-----------------------------------------|-----------------------------------|-------------------------------------|-----------------------------------------|------------------|---------------------|
| <b>WC</b>      | 0                                       | 0                                 | 0                                   | 1 ± 0                                   | 172.87 ± 33.03   | 300 ± 81.65         |
| <b>Rlv3841</b> | 139.5 ± 18.80                           | 0.68 ± 0.05                       | 4.87 ± 1.10                         | 3 ± 0                                   | 1232.67 ± 54.26  | 2275 ± 94.65        |
| <b>V116</b>    | 198.75 ± 23.48                          | 1.06 ± 0.13                       | 5.34 ± 0.03                         | 3 ± 1.08                                | 1001.12 ± 334.87 | 2575 ± 165.20       |
| <b>G083</b>    | 118.75 ± 10.21                          | 0.75 ± 0.06                       | 6.27 ± 0.75                         | 4.25 ± 0.25                             | 1883 ± 138.30    | 3475 ± 893.84       |

[gr] [plant]<sup>-1</sup>, † [mg] [nodule]<sup>-1</sup>[plant]<sup>-1</sup>, ‡ [mg] [plant]<sup>-1</sup>. Values are the mean from at least four biological replicates ± SEM.

**Table S16. Full statistical analysis of effectiveness assessment of selected strains by DW[plant]<sup>-1</sup>**

| <b>Table Analyzed</b>                                 |  | <b>DW/plant</b> |                    |              |                   |          |         |       |    |
|-------------------------------------------------------|--|-----------------|--------------------|--------------|-------------------|----------|---------|-------|----|
| <b>Data sets analyzed</b>                             |  | A-D             |                    |              |                   |          |         |       |    |
| <b>ANOVA summary</b>                                  |  |                 |                    |              |                   |          |         |       |    |
| <b>F</b>                                              |  | 119.0           |                    |              |                   |          |         |       |    |
| <b>P value</b>                                        |  | <0.0001         |                    |              |                   |          |         |       |    |
| <b>P value summary</b>                                |  | ****            |                    |              |                   |          |         |       |    |
| <b>Significant diff. among means (P &lt; 0.05)?</b>   |  | Yes             |                    |              |                   |          |         |       |    |
| <b>R squared</b>                                      |  | 0.9675          |                    |              |                   |          |         |       |    |
| <b>Brown-Forsythe test</b>                            |  |                 |                    |              |                   |          |         |       |    |
| <b>F (DFn, DFd)</b>                                   |  | 0.2632 (3, 12)  |                    |              |                   |          |         |       |    |
| <b>P value</b>                                        |  | 0.8506          |                    |              |                   |          |         |       |    |
| <b>P value summary</b>                                |  | ns              |                    |              |                   |          |         |       |    |
| <b>Are SDs significantly different (P &lt; 0.05)?</b> |  | No              |                    |              |                   |          |         |       |    |
| <b>Bartlett's test</b>                                |  |                 |                    |              |                   |          |         |       |    |
| <b>Bartlett's statistic (corrected)</b>               |  | 1.259           |                    |              |                   |          |         |       |    |
| <b>P value</b>                                        |  | 0.7390          |                    |              |                   |          |         |       |    |
| <b>P value summary</b>                                |  | ns              |                    |              |                   |          |         |       |    |
| <b>Are SDs significantly different (P &lt; 0.05)?</b> |  | No              |                    |              |                   |          |         |       |    |
| <b>ANOVA table</b>                                    |  | SS              | DF                 | MS           | F (DFn, DFd)      | P value  |         |       |    |
| <b>Treatment (between columns)</b>                    |  | 21496875        | 3                  | 7165625      | F (3, 12) = 119.0 | P<0.0001 |         |       |    |
| <b>Residual (within columns)</b>                      |  | 722500          | 12                 | 60208        |                   |          |         |       |    |
| <b>Total</b>                                          |  | 22219375        | 15                 |              |                   |          |         |       |    |
| <b>Data summary</b>                                   |  |                 |                    |              |                   |          |         |       |    |
| <b>Number of treatments (columns)</b>                 |  | 4               |                    |              |                   |          |         |       |    |
| <b>Number of values (total)</b>                       |  | 16              |                    |              |                   |          |         |       |    |
| <b>Number of families</b>                             |  | 1               |                    |              |                   |          |         |       |    |
| <b>Number of comparisons per family</b>               |  | 3               |                    |              |                   |          |         |       |    |
| <b>Alpha</b>                                          |  | 0.05            |                    |              |                   |          |         |       |    |
| <b>Dunnett's multiple comparisons test</b>            |  | Mean Diff.      | 95.00% CI of diff. | Significant? | Adjusted P Value  | B-?      |         |       |    |
| <b>G083 vs. Rlv3841</b>                               |  | 1200            | 734.5 to 1666      | ****         | <0.0001           | A        | Rlv3841 |       |    |
| <b>G083 vs. V116</b>                                  |  | 900.0           | 434.5 to 1366      | ***          | 0.0006            | C        | V116    |       |    |
| <b>G083 vs. WC</b>                                    |  | 3175            | 2709 to 3641       | ****         | <0.0001           | D        | WC      |       |    |
| <b>Test details</b>                                   |  | Mean 1          | Mean 2             | Mean Diff.   | SE of diff.       | n1       | n2      | q     | DF |
| <b>G083 vs. Rlv3841</b>                               |  | 3475            | 2275               | 1200         | 173.5             | 4        | 4       | 6.916 | 12 |
| <b>G083 vs. V116</b>                                  |  | 3475            | 2575               | 900.0        | 173.5             | 4        | 4       | 5.187 | 12 |
| <b>G083 vs. WC</b>                                    |  | 3475            | 300.0              | 3175         | 173.5             | 4        | 4       | 18.30 | 12 |

## SI Figures

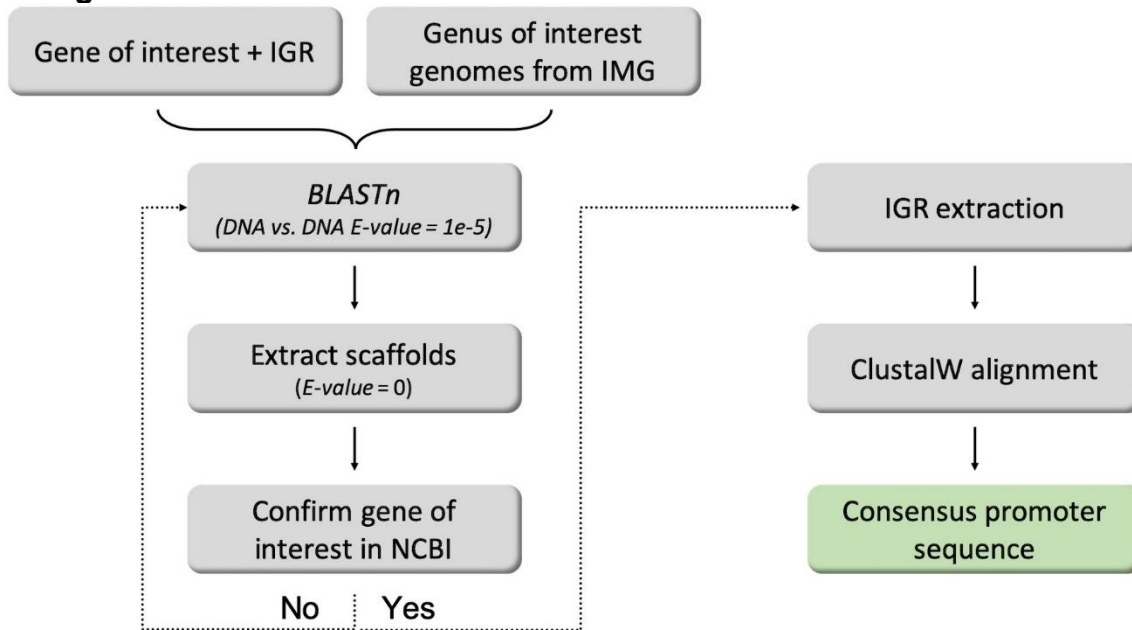

**Fig. S1.** Process followed to determine a consensus sequence for a nodule-specific promoter expressed in a wide range of biovars and strains of *R. leguminosarum*.

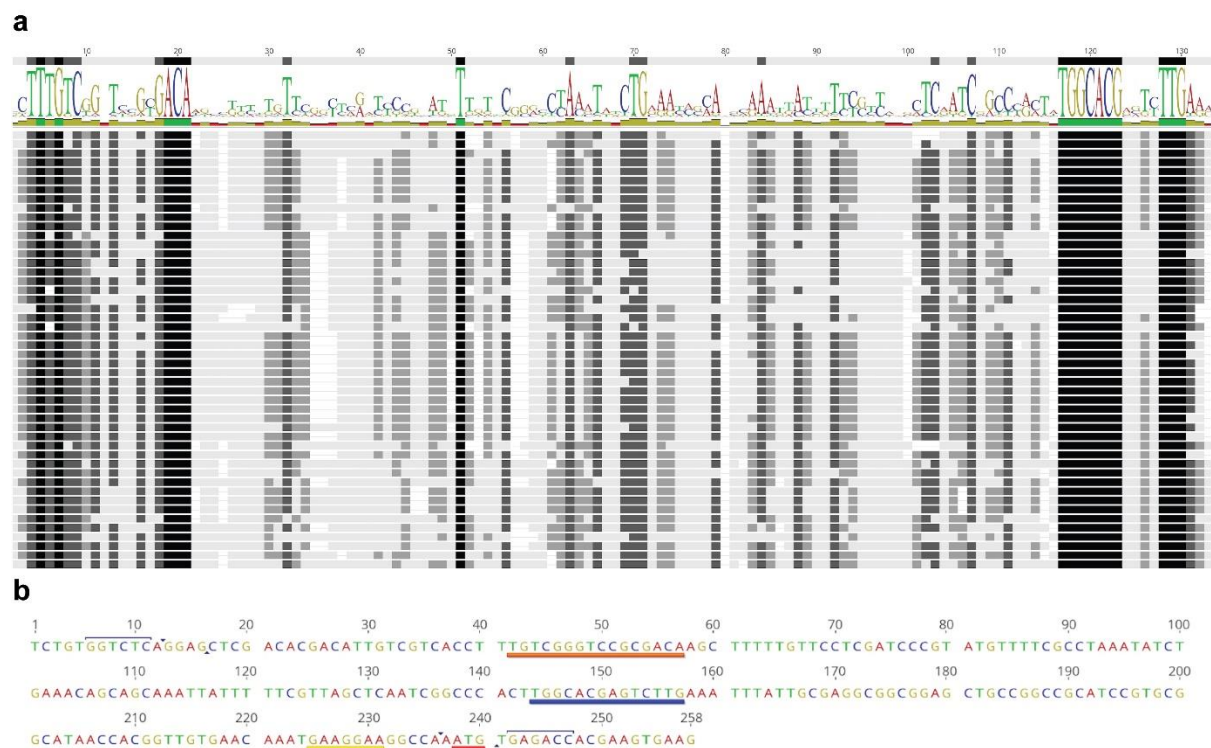

**Fig. S2. Design of *PsnifH*, a consensus promoter for *nifH* in *Rhizobium*.** a) Alignment of the IGR upstream of *nifH* from 48 rhizobial strains, b) *PsnifH* synthesized as a fragment with terminal *Bsa*I restriction sites for Golden Gate assembly as a PU module. The following features are indicated; UAS (orange), RpoN-binding site (blue) and RBS (yellow), with a start codon ATG (red).

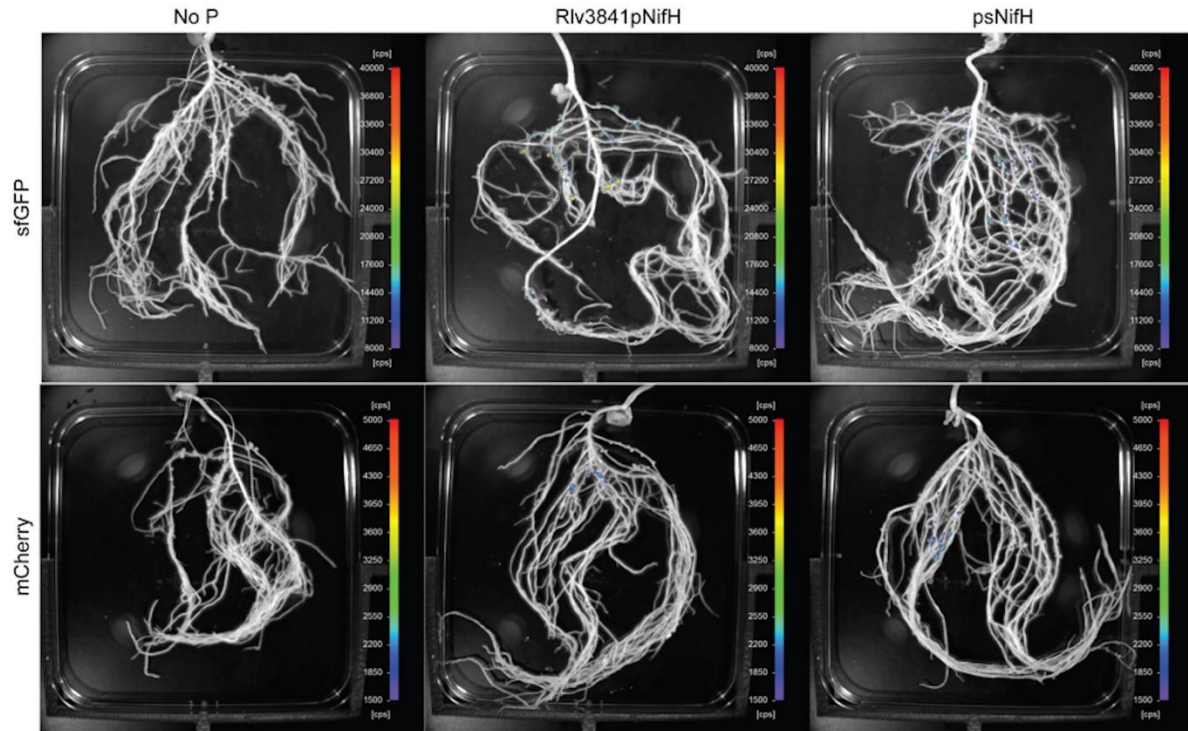

**Fig. S3. Pea root system from plants harvested at 21 dpi.** Fluorescence measurement from Rlv3841 expressing GFP under the control of i) No promoter, Rlv3841[pOPS0383] (negative control), ii) Rlv3841[pOPS0379] (positive control) and iii) Rlv3841[pOPS0381] (*PsniffH*) (scale, 8,000-40,000 cps). Rlv3841 expressing mCherry under the control of i) No promoter, Rlv3841[pOPS0384] (negative control), ii) Rlv3841[pOPS0380] (positive control) and iii) Rlv3841[pOPS0382] (*PsniffH*) (scale, 1,500-5,000 cps). Images shown are representative of four biological replicates.



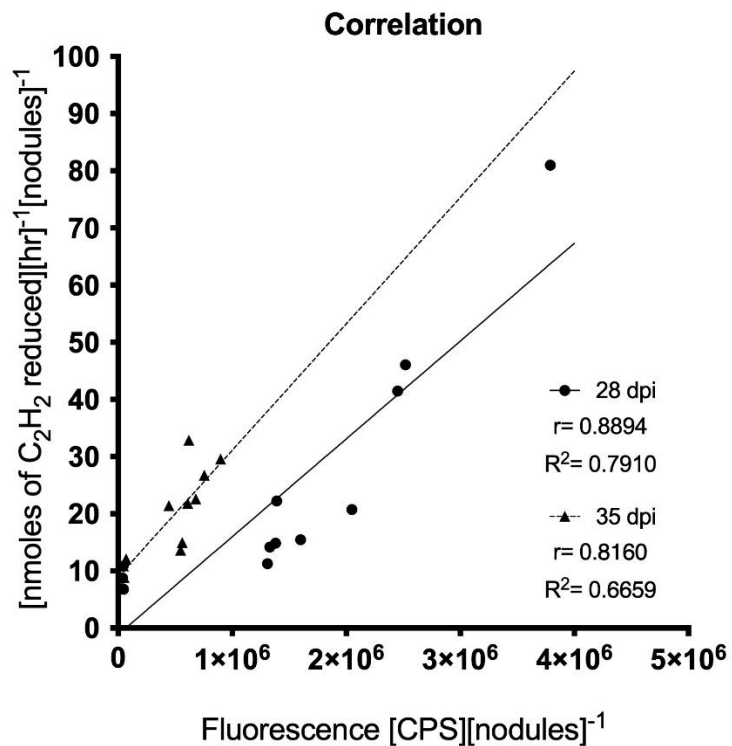

**Fig. S3. Correlation of nodule fluorescence and nitrogenase activity.** Pea plants at 28 and 35 dpi. GFP fluorescence and nitrogenase activity are normalized by number of nodules per plant. Each dot represents a single plant.

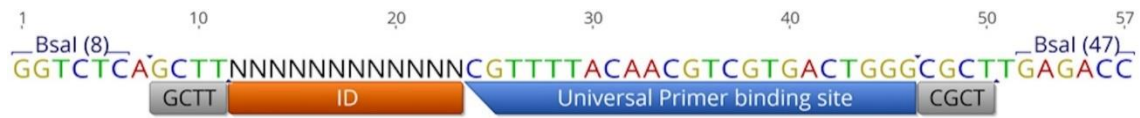

**Fig. S4. Plasmid ID Golden Gate T module.** Terminal Bsal restriction sites and overhangs (grey, sequence 5' to 3'). Plasmid ID is due to 12-nt Golay barcode (orange) and the universal primer binding site (blue).

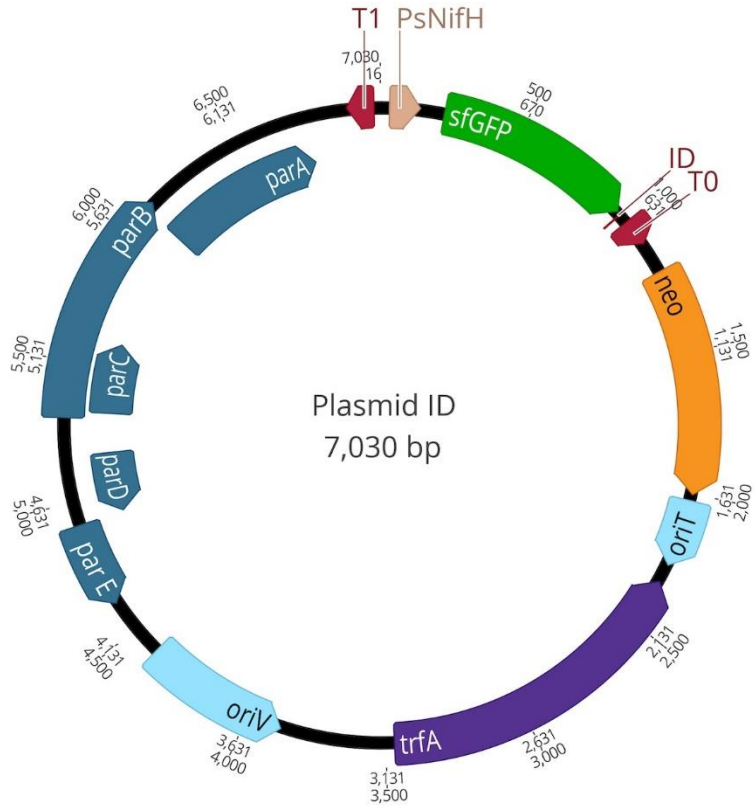

**Fig.S5. Schematic map of 95 plasmids constructed with unique plasmid IDs.** Plasmid ID (in red) is in T module position. Components for construction of all plasmids were identical, except the Plasmid ID T module, which was different in each case.

|          | 1        | 2        | 3        | 4        | 5        | 6        | 7        | 8        | 9        | 10       | 11       | 12       |
|----------|----------|----------|----------|----------|----------|----------|----------|----------|----------|----------|----------|----------|
| <b>A</b> | pOPS0491 | pOPS0492 | pOPS0493 | pOPS0494 | pOPS0495 | pOPS0496 | pOPS0497 | pOPS0498 | pOPS0499 | pOPS0500 | pOPS0501 | pOPS0502 |
| <b>B</b> | pOPS0503 | pOPS0504 | pOPS0505 | pOPS0506 | pOPS0507 | pOPS0508 | pOPS0509 | pOPS0510 | pOPS0511 | pOPS0512 | pOPS0513 | pOPS0514 |
| <b>C</b> | pOPS0515 | pOPS0516 | pOPS0517 | pOPS0518 | pOPS0519 | pOPS0520 | pOPS0521 | pOPS0522 | pOPS0523 | pOPS0524 | pOPS0525 | pOPS0526 |
| <b>D</b> | pOPS0527 | pOPS0528 | pOPS0529 | pOPS0530 | pOPS0531 | pOPS0532 | pOPS0533 | pOPS0534 | pOPS0535 | pOPS0536 | pOPS0537 | pOPS0538 |
| <b>E</b> | pOPS0539 | pOPS0540 | pOPS0541 | pOPS0542 | pOPS0543 | pOPS0544 | pOPS0545 | pOPS0546 | pOPS0547 | pOPS0548 | pOPS0549 | pOPS0550 |
| <b>F</b> | pOPS0551 | pOPS0552 | pOPS0553 | pOPS0554 | pOPS0555 | pOPS0556 | pOPS0557 | pOPS0558 | pOPS0559 | pOPS0560 | pOPS0561 | pOPS0562 |
| <b>G</b> | pOPS0563 | pOPS0564 | pOPS0565 | pOPS0566 | pOPS0567 | pOPS0568 | pOPS0569 | pOPS0570 | pOPS0571 | pOPS0572 | pOPS0573 | pOPS0574 |
| <b>H</b> | pOPS0575 | pOPS0576 | pOPS0577 | pOPS0578 | pOPS0579 | pOPS0580 | pOPS0581 | pOPS0582 | Control  | pOPS0584 | pOPS0585 | pOPS0586 |

**Fig. S6. Plasmid IDs library, position in a 96-well plate.** All plasmids are identical, apart from the plasmid ID which is different in each case.

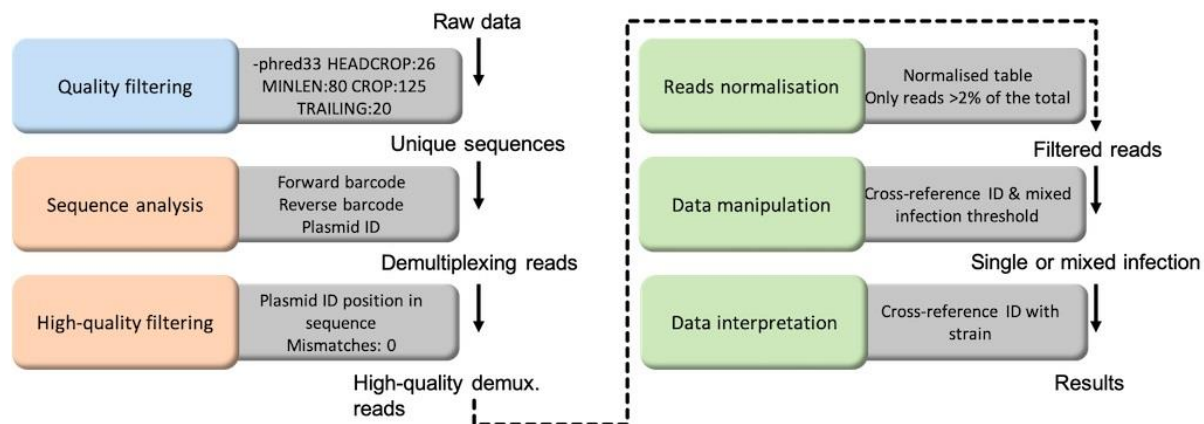

**Fig. S7 Workflow for data analysis from Ion Torrent reads.** Pre-processing steps in blue rectangles, sequence analysis in orange rectangles and data manipulation in green rectangles.

```

import sys
import getopt
import csv
import gzip
import itertools
import pandas as pd
import numpy as np
from Bio import SeqIO
from Bio.Seq import Seq

def fasta_to_dict(path, reverse):
    ret_dict = SeqIO.to_dict(SeqIO.parse(path, "fasta"))
    ret_dict = {k:v.seq for k, v in ret_dict.items()}
    if(reverse):
        ret_dict = {k:v.reverse_complement() for k, v in ret_dict.items()}
    ret_dict = {k:str(v) for k, v in ret_dict.items()}
    #print(ret_dict)
    return(ret_dict)

def read_plasmids_table(path):
    plasmids = {}
    with open(path, 'r') as csvfile:
        table_reader = csv.DictReader(csvfile, delimiter=',', quotechar="")
        for row in table_reader:
            plasmids[row["Barcode name"]]= row["ID plasmid sequence"]
    return(plasmids)

def find_hash_position(sequence, tags):
    for key, value in tags.items():
        position = sequence.find(value)
        if position != -1:
            return (key, position)
    return ("none", -1)

def find_plasmid_positions(sequence, forward_dict, reverse_dict, plasmids,
orientation):
    fw_name, fw_pos = find_hash_position(sequence, forward_dict)
    rv_name, rv_pos = find_hash_position(sequence, reverse_dict)
    pl_name, pl_pos = find_hash_position(sequence, plasmids)

    if(fw_pos + rv_pos + pl_pos == -3 ):
        orientation = "."

    return ([fw_name, str(fw_pos), rv_name, str(rv_pos), pl_name,str(pl_pos),
orientation])

def write_raw_counts(fq, output_prefix, forward_dict, reverse_dict, plasmids):
    fw_f = fq

```

```

distances_f = output_prefix + "_distances_merge.txt"
with gzip.open(fw_f, "rt") as r1, open(distances_f, "w") as f3:

f3.write("fw_name, fw_pos, rev_name, rev_pos, pl_name, pl_pos, orientation\n")
for fw in SeqIO.parse(r1, "fastq") :
    str_seq = str(fw.seq)
    values = find_plasmid_positions(str_seq, forward_dict, reverse_dict,
plasmids, "+")

    if values[6] == ".":
        str_seq = str(fw.seq.reverse_complement())
        values = find_plasmid_positions(str_seq, forward_dict,
reverse_dict, plasmids, "-")

    f3.write(",".join(values))
f3.write("\n")

def write_summary(output_prefix):
    distances_f = output_prefix + "_distances_merge.txt"
    df = pd.read_csv(distances_f)
    summ=df[['fw_name', 'rev_name', 'pl_name', 'pl_pos']].groupby(['fw_name',
'rev_name', 'pl_name']).agg( ['count', 'mean'])
    summ.to_csv(output_prefix + "summary_merge.csv", sep=',')

def usage():
    print ("Usage: " + sys.argv[0] + " --plasmid=<plasmids.csv> --
forward=<forward_ids.fa> --reverse=<reverse_ids.fa> --
sequences=<sequences.fq.gz> --output_prefix=<file_prefix>")

def main(argv):
    try:
        opts, args = getopt.getopt(argv, 'p:f:r:s:o:h',
['plasmid=', 'forward=', 'reverse=', 'sequences=', 'output_prefix=', 'help'])
    except getopt.GetOptError:
        usage()
        sys.exit(2)

    if not opts:
        print ('No options supplied')
        usage()

    for opt, arg in opts:
        if opt in ('h', '--help'):
            usage()
            sys.exit(2)
        elif opt in ('p', '--plasmid'):
            plasmid_path = arg
            plasmids_dict = read_plasmids_tables_table(plasmid_path)
        elif opt in ('f', '--forward'):

```

```

        forward_path = arg
        forward_dict = fasta_to_dict(forward_path, False)
    elif opt in ('r', '--reverse'):
        reverse_path = arg
        reverse_dict = fasta_to_dict(reverse_path, True)
    elif opt in ('s', '--sequences'):
        sequences_path = arg
        print(arg)
    elif opt in ('o', '--output_prefix'):
        output_prefix = arg

    write_raw_counts(sequences_path, output_prefix, forward_dict, reverse_dict,
plamids_dict)
    write_summary(output_prefix)

if __name__ == '__main__':
    main(sys.argv[1:])

```

**Fig. S8 Biopython script to identify reads by amplicon (plasmid ID) and sample-specific barcodes.**  
Full script available in: <https://github.com/marcelamendoza/Plasmid-ID>



| Row Barcode | Column Barcode |       |       |       |       |       |       |     |       |       |       |     |       |     |    |     |    |     |    |     |    |     |    |     |    |
|-------------|----------------|-------|-------|-------|-------|-------|-------|-----|-------|-------|-------|-----|-------|-----|----|-----|----|-----|----|-----|----|-----|----|-----|----|
|             | ID             | 1     |       | 2     |       | 3     |       | 4   |       | 5     |       | 6   |       | 7   |    | 8   |    | 9   |    | 10  |    | 11  |    | 12  |    |
|             |                | E10   | G2    | E10   | G2    | E10   | G2    | E10 | G2    | E10   | G2    | E10 | G2    | E10 | G2 | E10 | G2 | E10 | G2 | E10 | G2 | E10 | G2 | E10 | G2 |
| A           | 3E+04          | 2E+03 | 5E+04 |       | 6E+04 |       | 3E+04 |     | 1E+05 |       | 2E+05 |     | 3E+05 |     |    |     |    |     |    |     |    |     |    |     |    |
| B           | 4E+04          | 2E+05 | 2E+05 | 5E+03 | 2E+05 | 4E+03 | 1E+05 |     | 4E+05 |       | 4E+05 |     | 4E+05 |     |    |     |    |     |    |     |    |     |    |     |    |
| C           | 1E+05          | 2E+04 | 2E+05 | 2E+03 | 1E+05 | 3E+03 |       |     | 4E+05 |       | 5E+05 |     |       |     |    |     |    |     |    |     |    |     |    |     |    |
| D           | 1E+04          | 1E+05 | 2E+05 | 3E+03 | 1E+05 | 2E+03 |       |     | 3E+05 |       | 4E+05 |     |       |     |    |     |    |     |    |     |    |     |    |     |    |
| E           |                |       | 1E+05 |       | 1E+05 |       |       |     | 2E+05 |       | 4E+05 |     |       |     |    |     |    |     |    |     |    |     |    |     |    |
| F           |                |       | 2E+05 |       | 1E+05 |       |       |     | 3E+05 | 4E+03 | 4E+05 |     |       |     |    |     |    |     |    |     |    |     |    |     |    |
| G           |                |       | 2E+05 |       | 1E+05 |       |       |     | 3E+05 |       | 4E+05 |     |       |     |    |     |    |     |    |     |    |     |    |     |    |
| H           |                |       | 1E+05 |       | 9E+04 |       |       |     | 3E+05 |       | 5E+05 |     |       |     |    |     |    |     |    |     |    |     |    |     |    |

**Fig. S9. Total counts of plasmid ID E10 and G2 assigned to column and row barcodes.** Results are classified in graded coloured scale where green is the highest value, yellow is the midpoint percentile and red is the minimum value, cells in white do not show reads.

|   | 1        | 2       | 3       | 4       | 5       | 6        | 7       | 8      | 9       | 10   | 11   | 12    |
|---|----------|---------|---------|---------|---------|----------|---------|--------|---------|------|------|-------|
| A | UPM791   | Rlv3841 | WSM1475 | WSM1481 | WSM1529 | WSM1488  | WSM1521 | 370    | V060    | V014 | G011 | VSX1  |
| B | CellTech | JED2    | 364     | PB6-3B  | VF2     | CORUS 16 | CORUS 1 | 388    | V068    | V043 | V002 | VSX7  |
| C | 13       | VF5     | SU303   | LegTech | G004    | G077     | G073    | 23--1  | V067    | H012 | V004 | VSX10 |
| D | L102     | L104    | G007    | G051    | V116    | G008     | V006    | 387    | V069    | H009 | V008 | VSX11 |
| E | 24       | E2-1B   | PB3-3   | 536     | 42      | PeanNW   | 367     | BeanLA | V074    | H127 | V010 | VSX16 |
| F | G093     | G099    | G083    | G109    | G108    | G094     | L008    | L019   | V100    | H130 | V030 | VSX25 |
| G | H011     | H082    | H174    | G028    | G067    | G088     | L002    | 2B-1   | G016    | H178 | V050 | VSX28 |
| H | L010     | L018    | L070    | L074    | L079    | L082     | L111    | E2-1A  | Control | H031 | V057 | VSX32 |

**Fig. S11. Final selected Rlv strains (Rlv-library) arranged in a 96-well plate.** Strains in yellow were studied in competition assays. Strains in blue were studied for effectiveness at fixing nitrogen in laboratory conditions, strains in grey were studied for effectiveness at fixing nitrogen in field conditions, strains in green have been phylogenetically analyzed and strains in orange came from the same soil but were selected by different hosts.

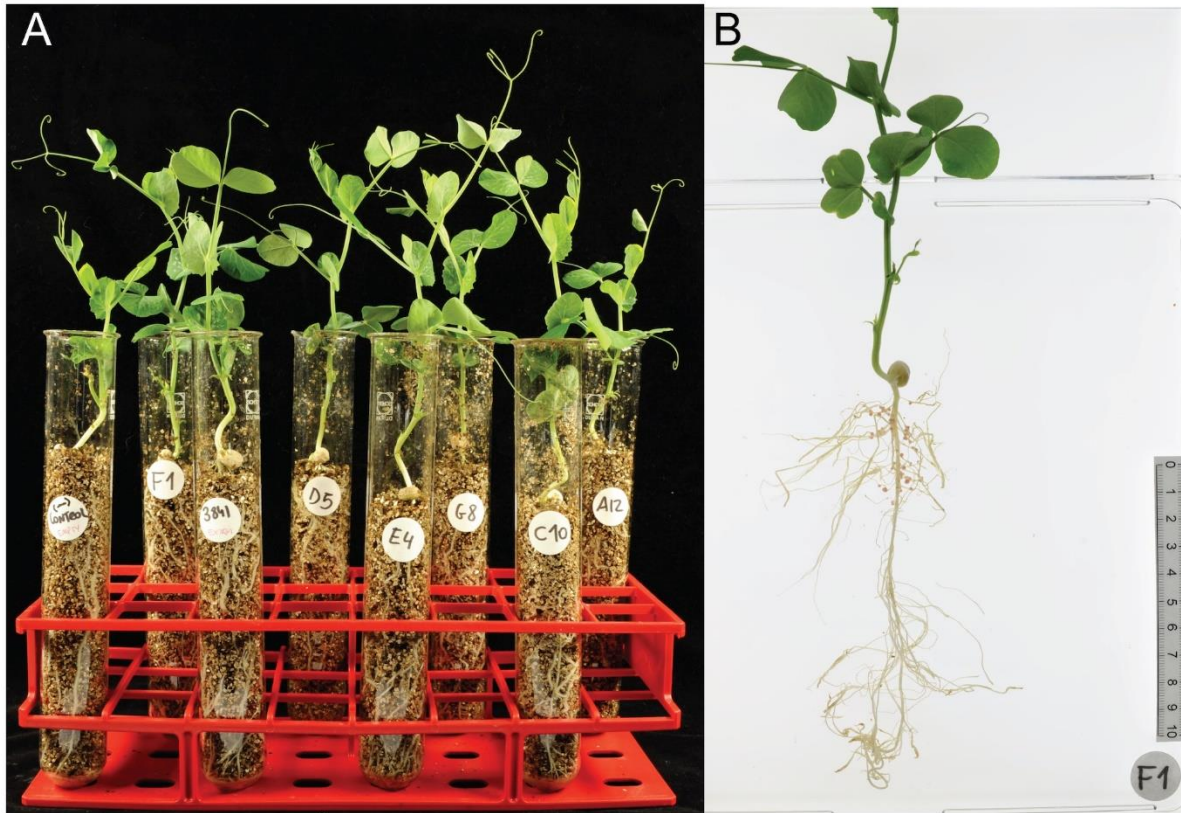

**Fig. S10. Nodulation of pea plant seedlings by rhizobial strains.** A) Nodulation test in pea plants using the 95 selected rhizobial strains from Fig. S11. B) Example of a pea plant showing root nodules indicative of an effective symbiosis.

|   | 1                      | 2                     | 3                     | 4                     | 5                  | 6                      | 7                       | 8                   | 9                  | 10                 | 11                 | 12                  |
|---|------------------------|-----------------------|-----------------------|-----------------------|--------------------|------------------------|-------------------------|---------------------|--------------------|--------------------|--------------------|---------------------|
| A | UPM791<br>[pOPS0491]   | Riv3841<br>[pOPS0492] | WSM1475<br>[pOPS0493] | WSM1481<br>[pOPS0494] |                    | WSM1488<br>[pOPS0496]  |                         |                     | V060<br>[pOPS0499] | V014<br>[pOPS0500] | G011<br>[pOPS0501] | VSX1<br>[pOPS0502]  |
| B | CellTech<br>[pOPS0503] | JED2<br>[pOPS0504]    | 364<br>[pOPS0505]     | PB6-3B<br>[pOPS0506]  | VF2<br>[pOPS0507]  | CORUS 16<br>[pOPS0508] | CORUS 1+2<br>[pOPS0509] |                     | V068<br>[pOPS0511] |                    | V002<br>[pOPS0513] | VSX7<br>[pOPS0514]  |
| C | 13<br>[pOPS0515]       | VF5<br>[pOPS0516]     | SU303<br>[pOPS0517]   | LegTech<br>[pOPS0518] | G004<br>[pOPS0519] | G077<br>[pOPS0520]     | G073<br>[pOPS0521]      | 23-1<br>[pOPS0522]  | V067<br>[pOPS0523] | H012<br>[pOPS0524] | V004<br>[pOPS0525] | VSX10<br>[pOPS0526] |
| D | L102<br>[pOPS0527]     | L104<br>[pOPS0528]    | G007<br>[pOPS0529]    | G051<br>[pOPS0530]    | V116<br>[pOPS0531] | G008<br>[pOPS0532]     | V006<br>[pOPS0533]      | 387<br>[pOPS0534]   | V069<br>[pOPS0535] | H009<br>[pOPS0536] | V008<br>[pOPS0537] | VSX11<br>[pOPS0538] |
| E | 24<br>[pOPS0539]       | E2-1B<br>[pOPS0540]   | PB3-3<br>[pOPS0541]   | 536<br>[pOPS0542]     |                    | PeanNW<br>[pOPS0544]   | 367<br>[pOPS0545]       |                     | V074<br>[pOPS0547] | H127<br>[pOPS0548] | V010<br>[pOPS0549] | VSX16<br>[pOPS0550] |
| F | G093<br>[pOPS0551]     | G099<br>[pOPS0552]    | G083<br>[pOPS0553]    | G109<br>[pOPS0554]    | G108<br>[pOPS0555] | G094<br>[pOPS0556]     | L008<br>[pOPS0557]      | L019<br>[pOPS0558]  | V100<br>[pOPS0559] | H130<br>[pOPS0560] | V030<br>[pOPS0561] |                     |
| G |                        | H082<br>[pOPS0564]    | H174<br>[pOPS0565]    | G028<br>[pOPS0566]    | G067<br>[pOPS0567] | G088<br>[pOPS0568]     |                         | 2B-1<br>[pOPS0570]  | G016<br>[pOPS0571] | H178<br>[pOPS0572] | V050<br>[pOPS0573] | VSX28<br>[pOPS0574] |
| H | L010<br>[pOPS0575]     | L018<br>[pOPS0576]    | L070<br>[pOPS0577]    | L074<br>[pOPS0578]    | L079<br>[pOPS0579] | L082<br>[pOPS0580]     |                         | E2-1A<br>[pOPS0582] |                    | H031<br>[pOPS0584] | V057<br>[pOPS0585] | VSX32<br>[pOPS0586] |

**Fig. S11. Final library of tagged Riv strains (tagged-strains) with plasmid IDs.** Empty cells do not contain any bacteria.

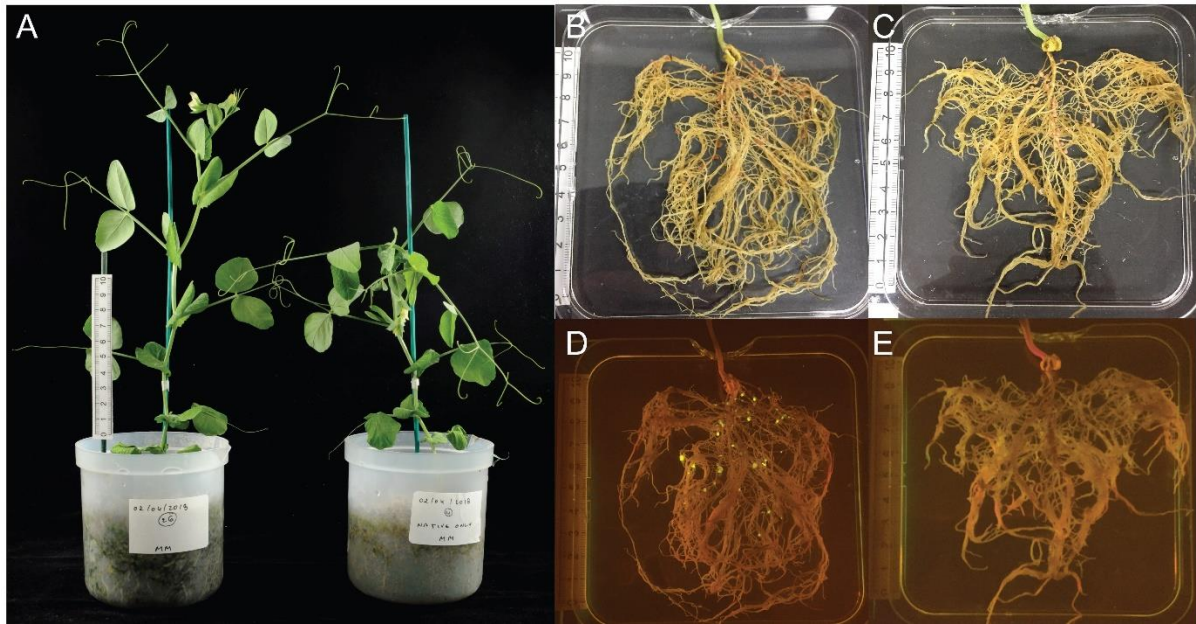

**Fig. S12. Pea plants grown in Yatesbury soil.** A) Plant at 21 dpi with tagged-strain inoculum on the left and -ve control on the right. (B) Root system of inoculated and (C) -ve control plants showing typical symbiotically-effective root nodules exposed to a blue-light transilluminator examining fluorescence from nodules formed by tagged-strains expressing GFP under *PsnifH* control. Photographs taken with a camera fitted with a blue light filter. D) Plant inoculated with tagged-strains showing nodules with green fluorescence. E) Nodules from -ve controls show no green fluorescence.

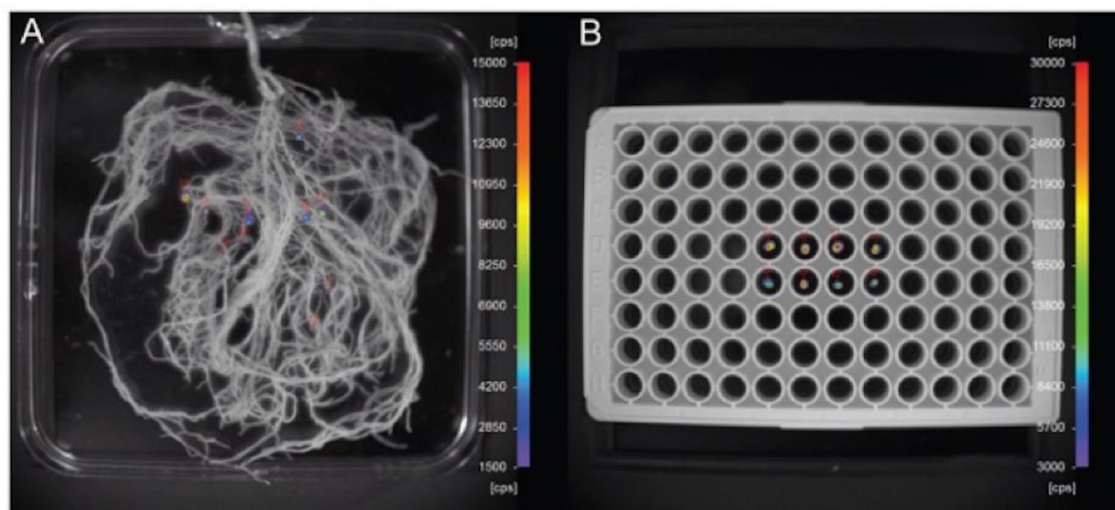

**Fig. S13. Analysis of fluorescence from nodules.** A) Quantification of green fluorescence with a NightOWL CCD camera of whole root systems to identify the brightest nodules. B) Fluorescence of eight selected individual nodules was quantified in a plate reader.

## SI VIDEO

**Video S1. 3D structures of individual bacteroids.** Bacteroids formed by Rlv3841[pOPS0381] (GFP under the control of *PsniifH*) from crushed pea root nodules. 3D segmentation using a GFP TIF image stack. Meshes were generated to obtain the volume of individual bacteroids. Individual bacteroids were color-identified according to volume (scale from 0 to 60  $\mu\text{m}^3$ ).

## SI References

1. V. M. Markowitz, *et al.*, IMG/M: The integrated metagenome data management and comparative analysis system. *Nucleic Acids Res.* **40** (2012).
2. N. R. Coordinators, Database resources of the National Center for Biotechnology Information. *Nucleic Acids Res* **41**, D8–D20 (2013).
3. C. Engler, R. Kandzia, S. Marillonnet, A one pot, one step, precision cloning method with high throughput capability. *PLoS One* **3**, e3647 (2008).
4. D. W. Fadrosh, *et al.*, An improved dual-indexing approach for multiplexed 16S rRNA gene sequencing on the Illumina MiSeq platform. *Microbiome* **2**, 6 (2014).
5. R. S. C. de Souza, *et al.*, Unlocking the bacterial and fungal communities assemblages of sugarcane microbiome. *Sci. Rep.* **6**, 28774 (2016).
6. A. M. Bolger, M. Lohse, B. Usadel, Trimmomatic: a flexible trimmer for Illumina sequence data. *Bioinformatics* **30**, 2114–2120 (2014).
7. P. J. A. Cock, *et al.*, Biopython: freely available Python tools for computational molecular biology and bioinformatics. *Bioinformatics* **25**, 1422–1423 (2009).
8. W. McKinney, Data Structures for Statistical Computing in Python. *Proc. 9th Python Sci. Conf.* **1697900**, 51–56 (2010).
9. D. C. Murray, M. L. Coghlan, M. Bunce, From benchtop to desktop: important considerations when designing amplicon sequencing workflows. *PLoS One* **10**, e0124671 (2015).
10. P. Chomczynski, M. Rymaszewski, Alkaline polyethylene glycol-based method for direct PCR from bacteria, eukaryotic tissue samples, and whole blood. *Biotechniques* **40**, 454, 456, 458 (2006).
11. P. S. Poole, N. Schofield, C. J. Reid, E. M. Drew, D. L. Walshaw, Identification of chromosomal genes located downstream of *dctD* that affect the requirement for calcium and the lipopolysaccharide layer of *Rhizobium leguminosarum*. *Microbiology* **140**, 2797–809 (1994).
12. A. Sessitsch, K. Wilson, A. Akkermans, W. de Vos, Simultaneous detection of different *Rhizobium* strains marked with either the *Escherichia coli gusA* gene or the *Pyrococcus furiosus celB* gene. *Appl. Environ. Microbiol.* **62**, 4191–4194 (1996).
13. J. G. Howieson, M. J. Dilworth, *Working with rhizobia*, J. G. Howieson, M. J. Dilworth, Eds. (ACIAR, 2016).
14. J. Schindelin, *et al.*, Fiji: an open-source platform for biological-image analysis. *Nat. Methods* **9**, 676–682 (2012).
15. P. Barbier de Reuille, *et al.*, MorphoGraphX: A platform for quantifying morphogenesis in 4D. *Elife* **4** (2015).
16. S. Thoma, M. Schobert, An improved *Escherichia coli* donor strain for diparental mating. *FEMS Microbiol. Lett.* **294**, 127–132 (2009).
17. A. W. B. Johnston, J. E. Beringer, Identification of the *rhizobium* strains in pea root nodules using genetic markers. *J. Gen. Microbiol.* **87**, 343–50 (1975).
18. J. A. Downie, Q. S. Ma, C. D. Knight, G. Hombrecher, A. W. Johnston, Cloning of



- the symbiotic region of *Rhizobium leguminosarum*: the nodulation genes are between the nitrogenase genes and a nifA-like gene. *EMBO J.* **2**, 947–52 (1983).
19. C. Quinto, *et al.*, Reiteration of nitrogen fixation gene sequences in *Rhizobium phaseoli*. *Nature* **299**, 724–726 (1982).
  20. P. H. Graham, S. E. Viteri, F. Mackie, A. T. Vargas, A. Palacios, Variation in acid soil tolerance among strains of *Rhizobium phaseoli*. *F. Crop. Res.* **5**, 121–128 (1982).
  21. W. Reeve, *et al.*, Complete genome sequence of *Rhizobium leguminosarum* bv. *trifolii* strain WSM1325, an effective microsymbiont of annual Mediterranean clovers. *Stand. Genomic Sci.* **2**, 347–356 (2010).
  22. W. Reeve, *et al.*, Complete genome sequence of the Medicago microsymbiont *Ensifer (Sinorhizobium) medicae* strain WSM419. *Stand. Genomic Sci.* **2**, 77–86 (2010).
  23. S. Weidner, *et al.*, Genome sequence of the soybean symbiont *Sinorhizobium fredii* HH103. *J. Bacteriol.* **194**, 1617–8 (2012).
  24. C. Sánchez-Cañizares, J. Palacios, Construction of a marker system for the evaluation of competitiveness for legume nodulation in *Rhizobium* strains. *J. Microbiol. Methods* **92**, 246–249 (2013).
  25. N. Kumar, *et al.*, Bacterial genospecies that are not ecologically coherent: population genomics of *Rhizobium leguminosarum*. *Open Biol.* **5**, 140133 (2015).
  26. B. Jorriin Rubio, “Genomics of Specificity in the Symbiotic Interaction between *Rhizobium leguminosarum* and Legumes,” Universidad Politécnica de Madrid. (2016) <https://doi.org/10.20868/UPM.thesis.43380> (September 25, 2018).
  27. B. A. Geddes, M. A. Mendoza-Suárez, P. S. Poole, A Bacterial Expression Vector Archive (BEVA) for Flexible Modular Assembly of Golden Gate-Compatible Vectors. *Front. Microbiol.* **9**, 3345 (2019).
  28. E. Weber, C. Engler, R. Gruetzner, S. Werner, S. Marillonnet, A modular cloning system for standardized assembly of multigene constructs. *PLoS One* **6**, e16765 (2011).
  29. B. J. Perry, C. K. Yost, Construction of a mariner-based transposon vector for use in insertion sequence mutagenesis in selected members of the *Rhizobiaceae*. *BMC Microbiol.* **14**, 298 (2014).
